# Supplementary material for: Alternative splicing events implicated in carcinogenesis and prognosis of thyroid gland cancer
Source: PubMed Central journal article supplement (PMC7921437; doi:10.1038/s41598-021-84403-6), 2021-03-01

**Figure S1.** Risk survival status plot of acceptor sites (AA) model in thyroid cancer patients.

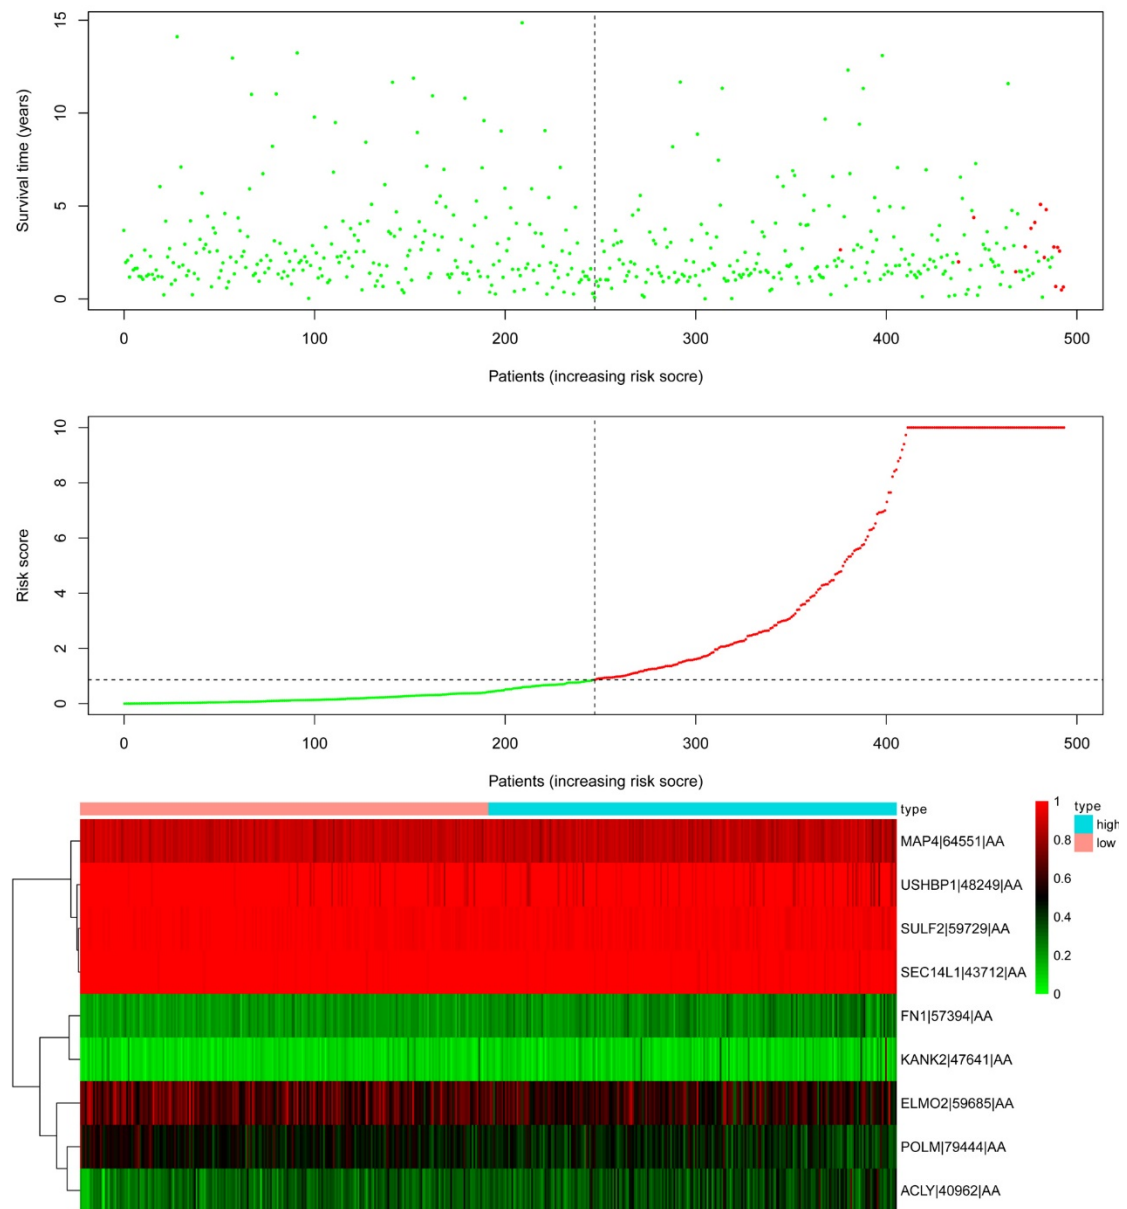

**Figure S2.** Risk survival status plot of alternate donor sites (AD) model in thyroid cancer patients.

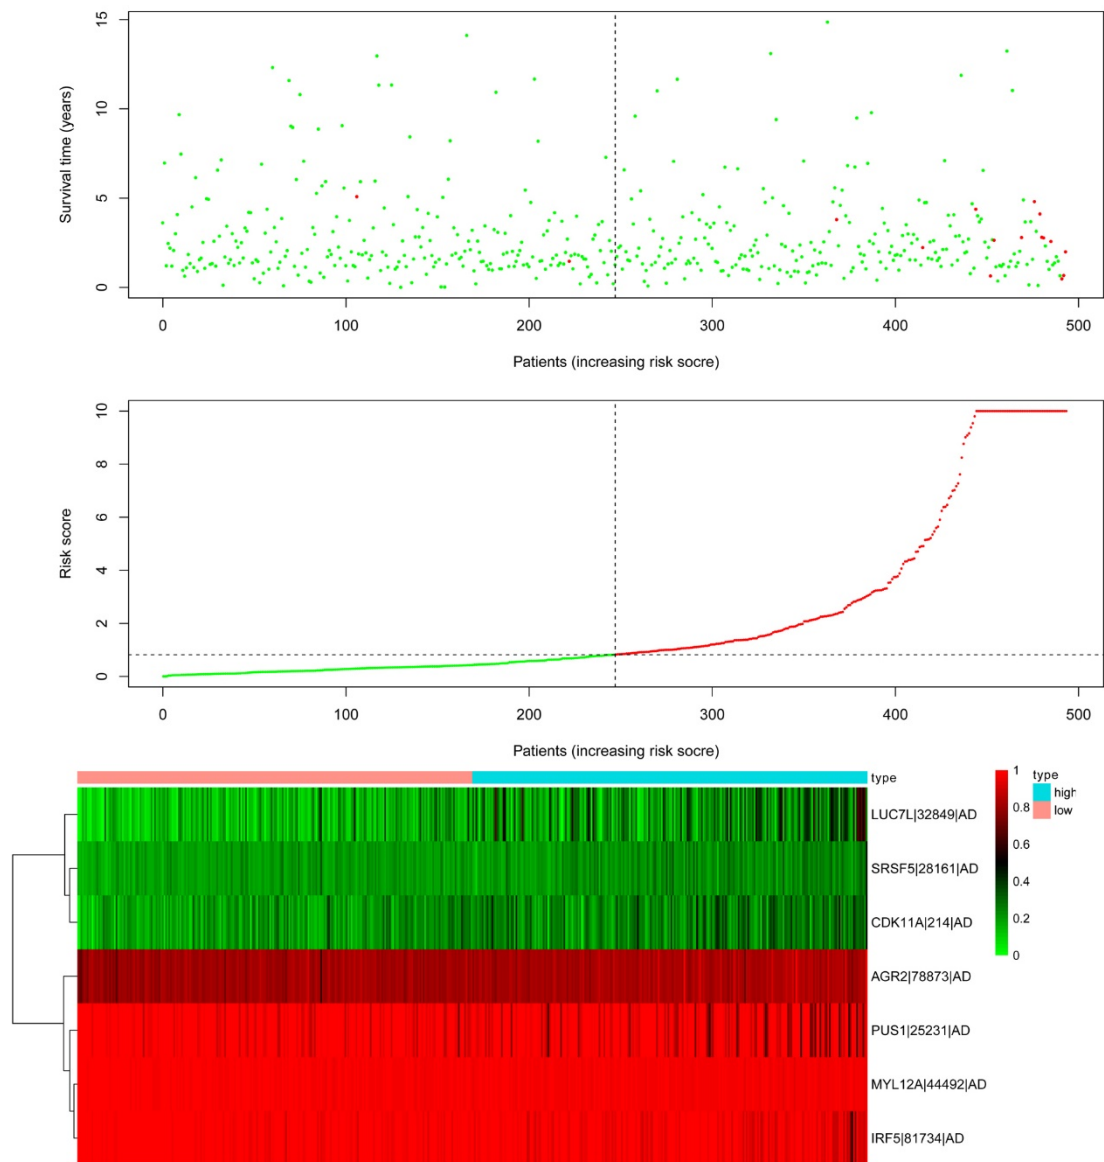

**Figure S3.** Risk survival status plot of alternate promoter (AP) model in thyroid cancer patients.

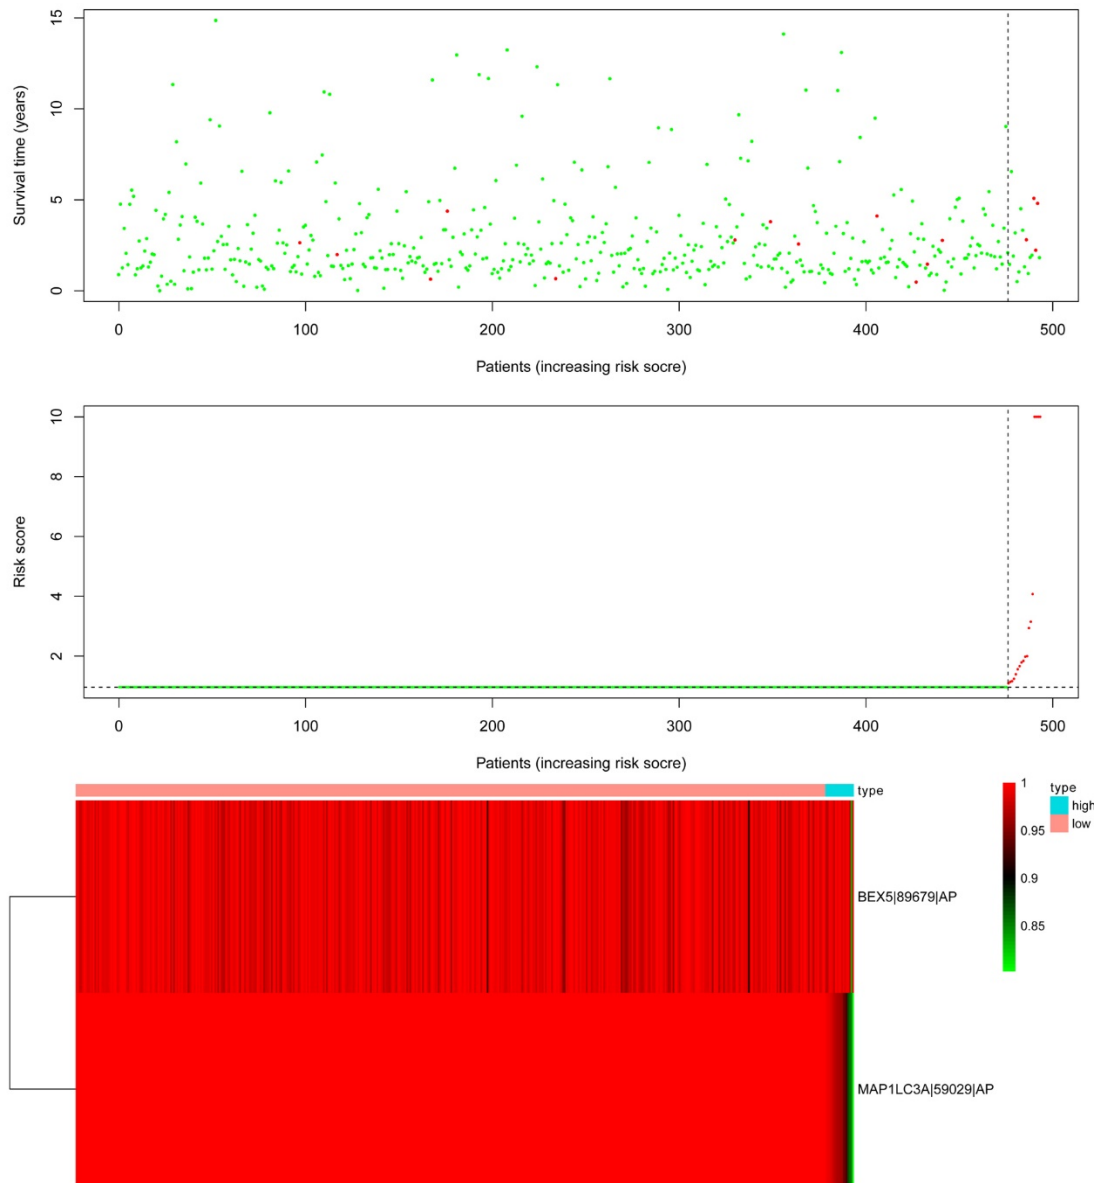

**Figure S4.** Risk survival status plot of alternate terminator (AT) model in thyroid cancer patients.

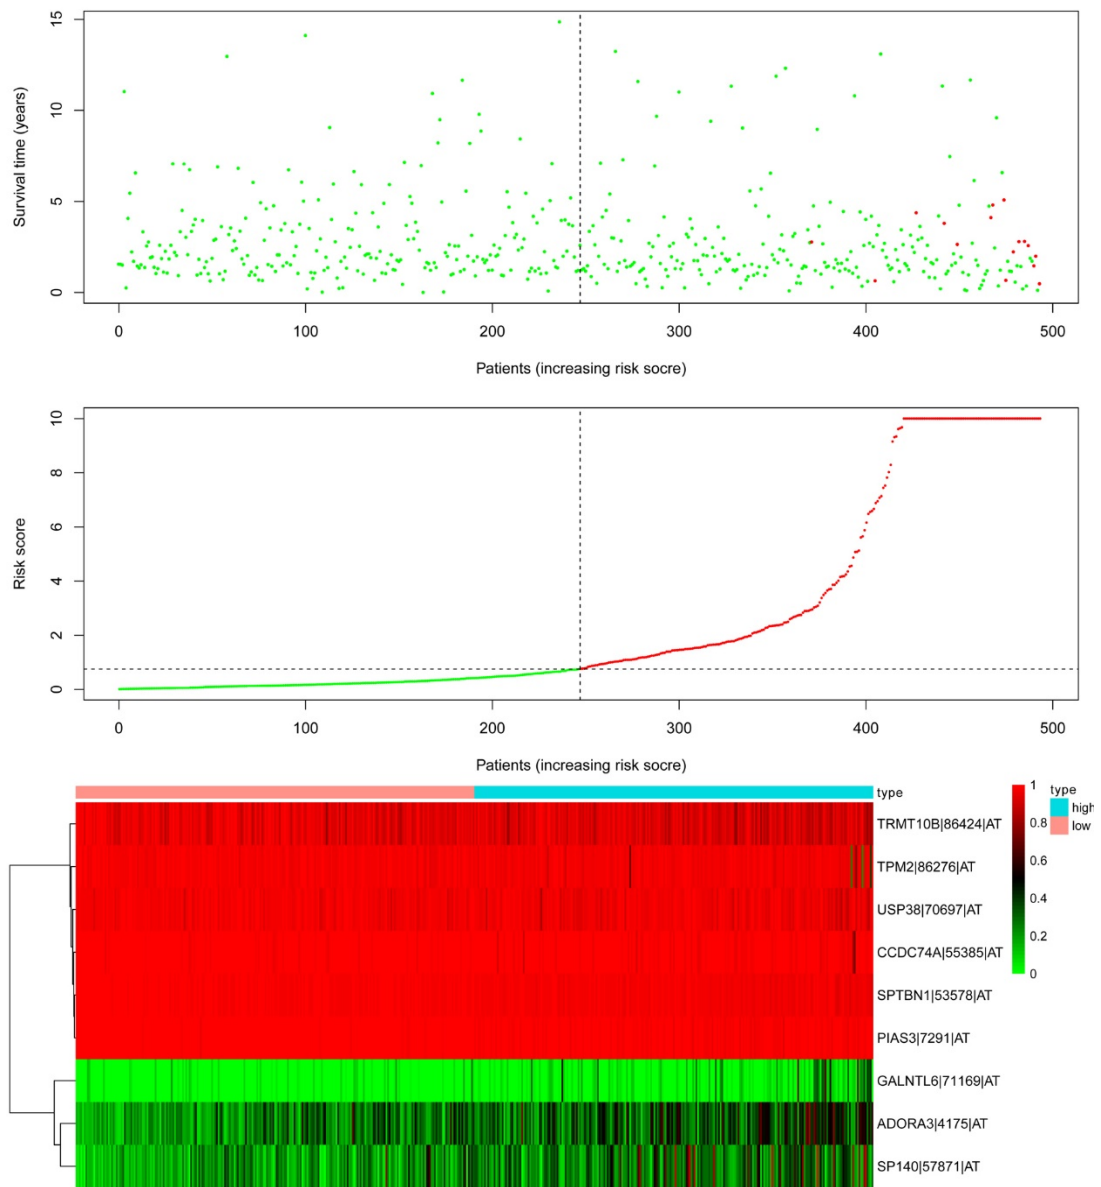

**Figure S5.** Risk survival status plot of exon skipping (ES) model in thyroid cancer patients.

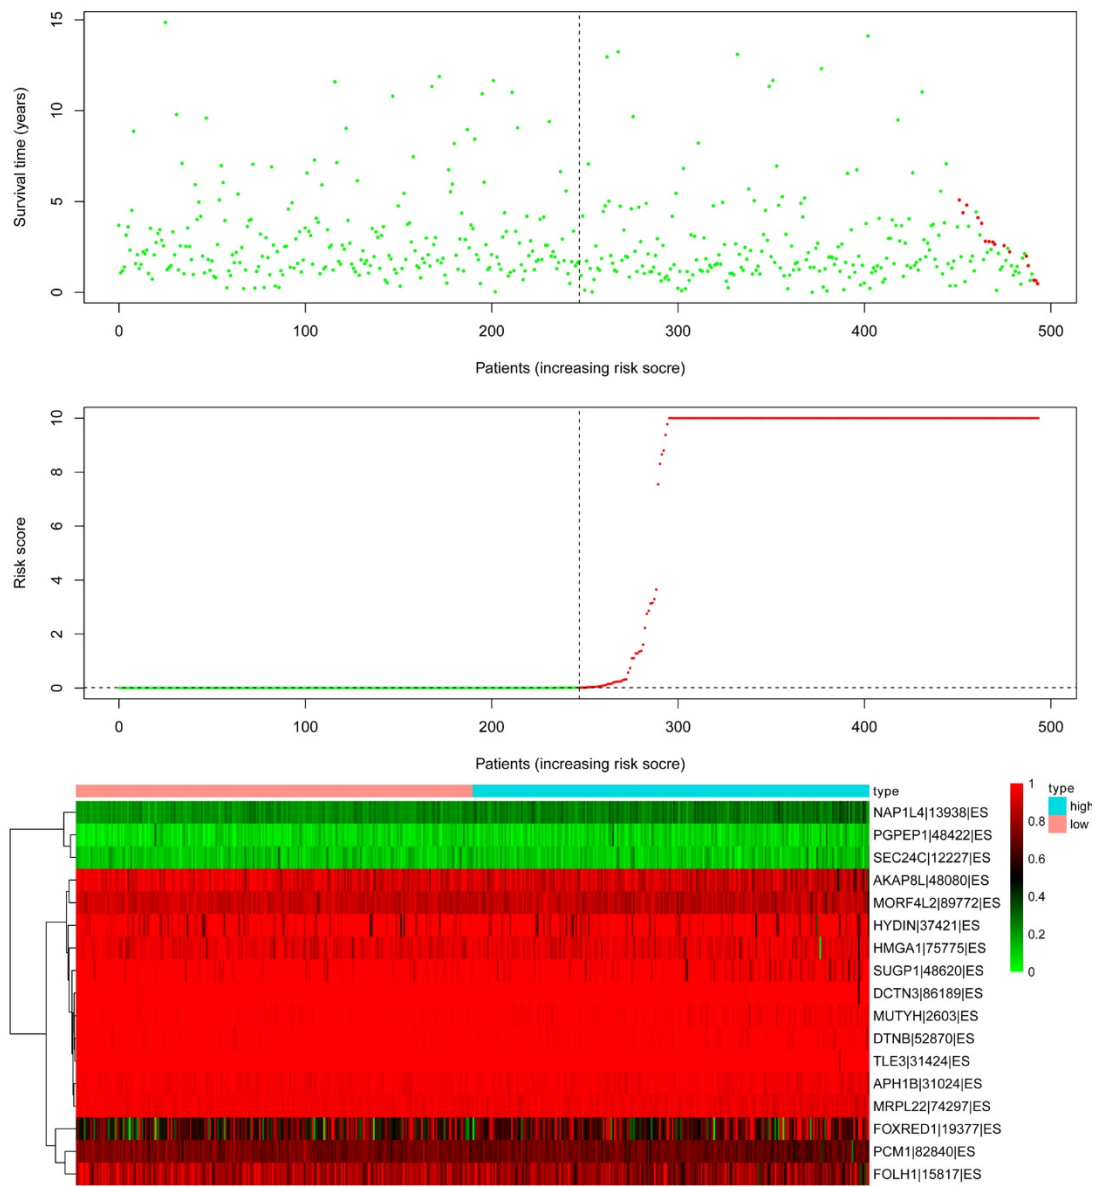

**Figure S6.** Risk survival status plot of exclusive exons (ME) model in thyroid cancer patients.

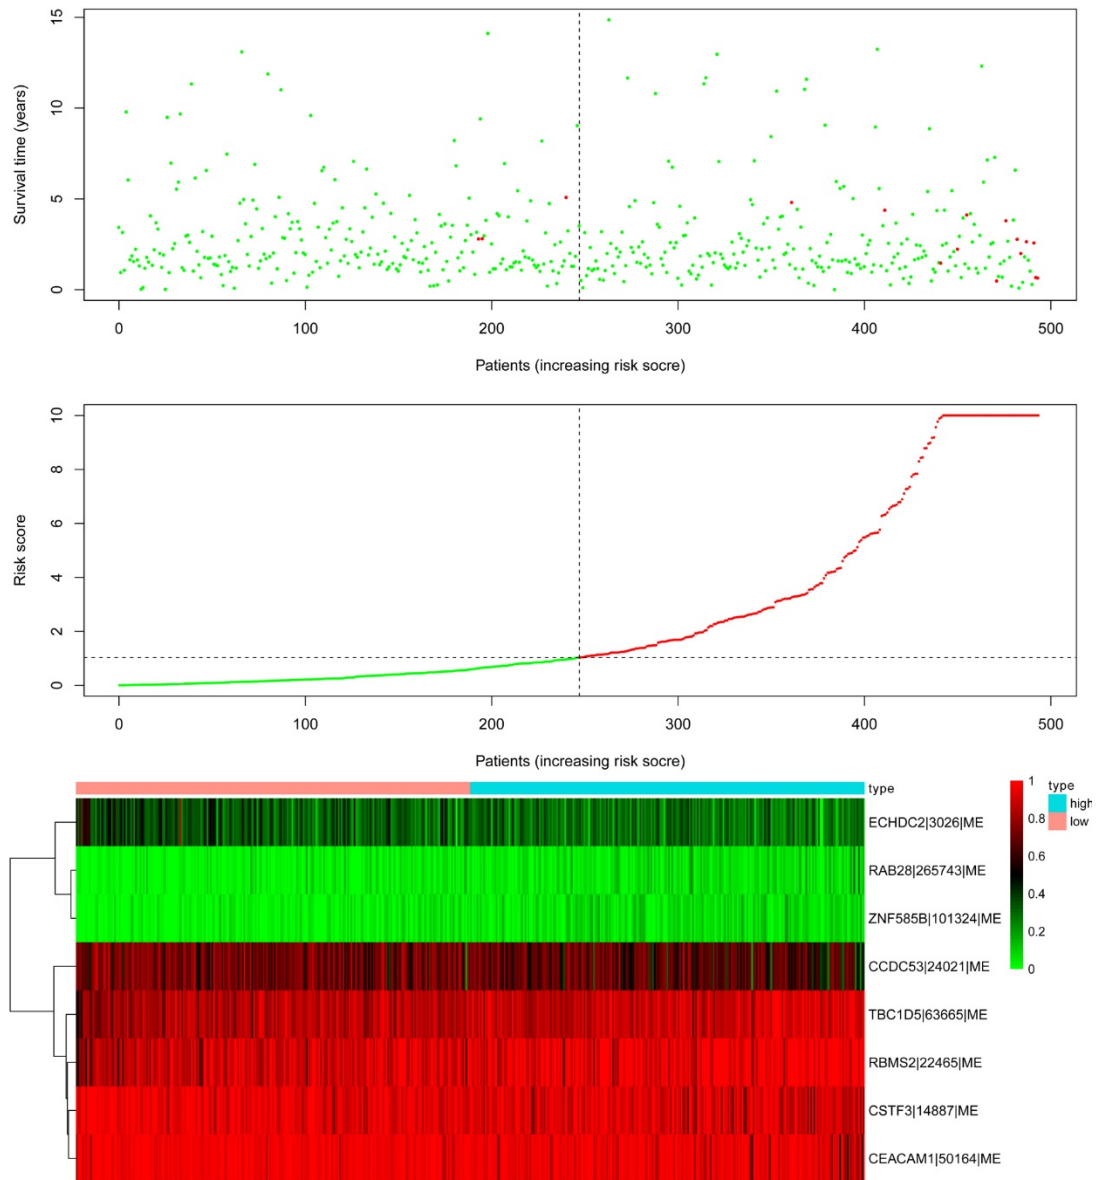

**Figure S7.** Risk survival status plot of retained intron (RI) model in thyroid cancer patients.

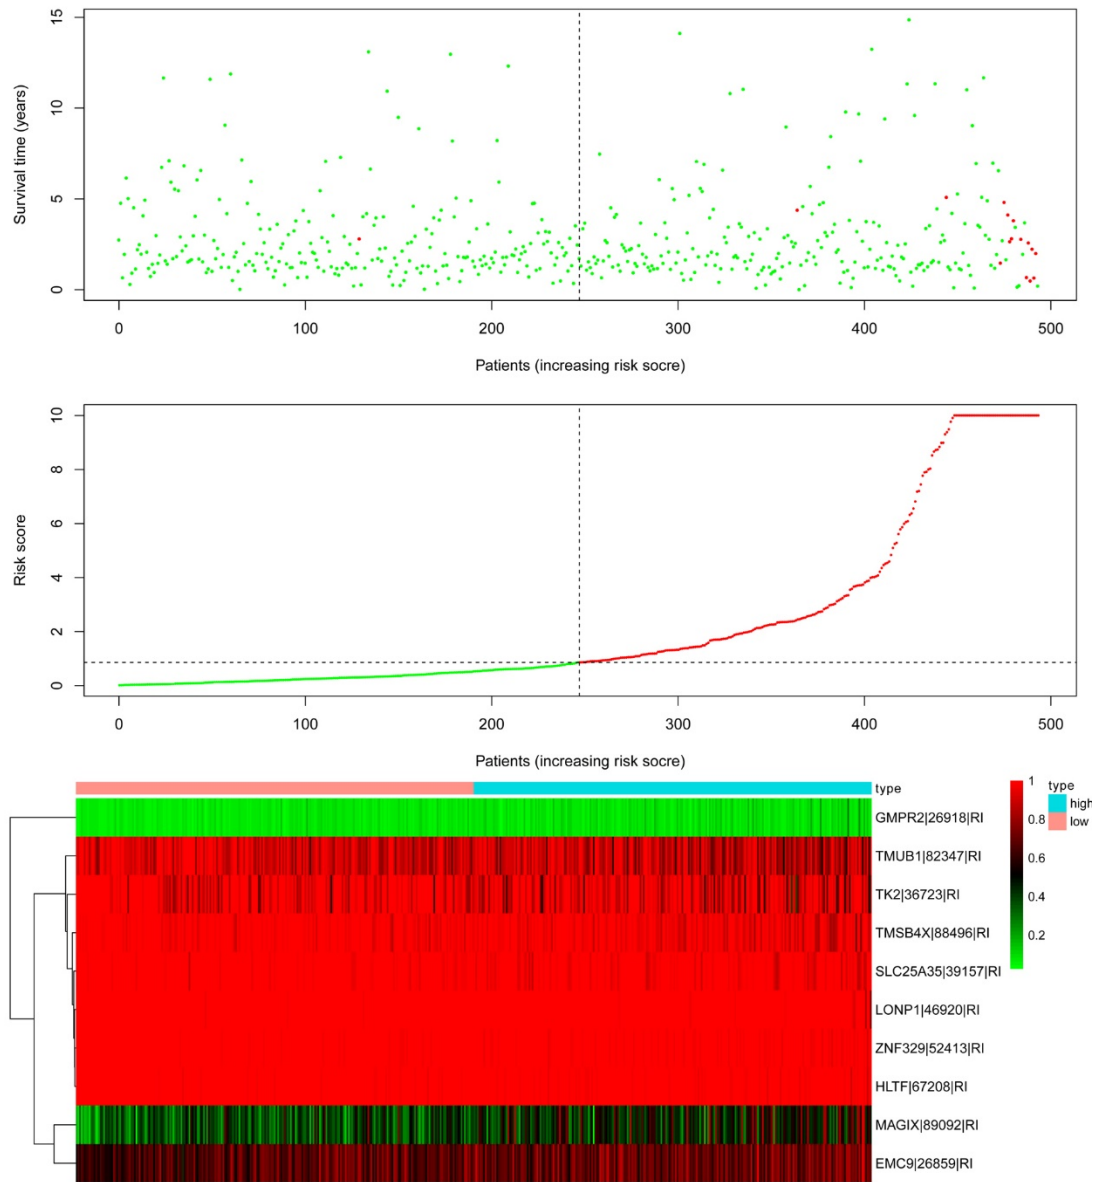

**Figure S8.** Risk survival status plot of all model in thyroid cancer patients.

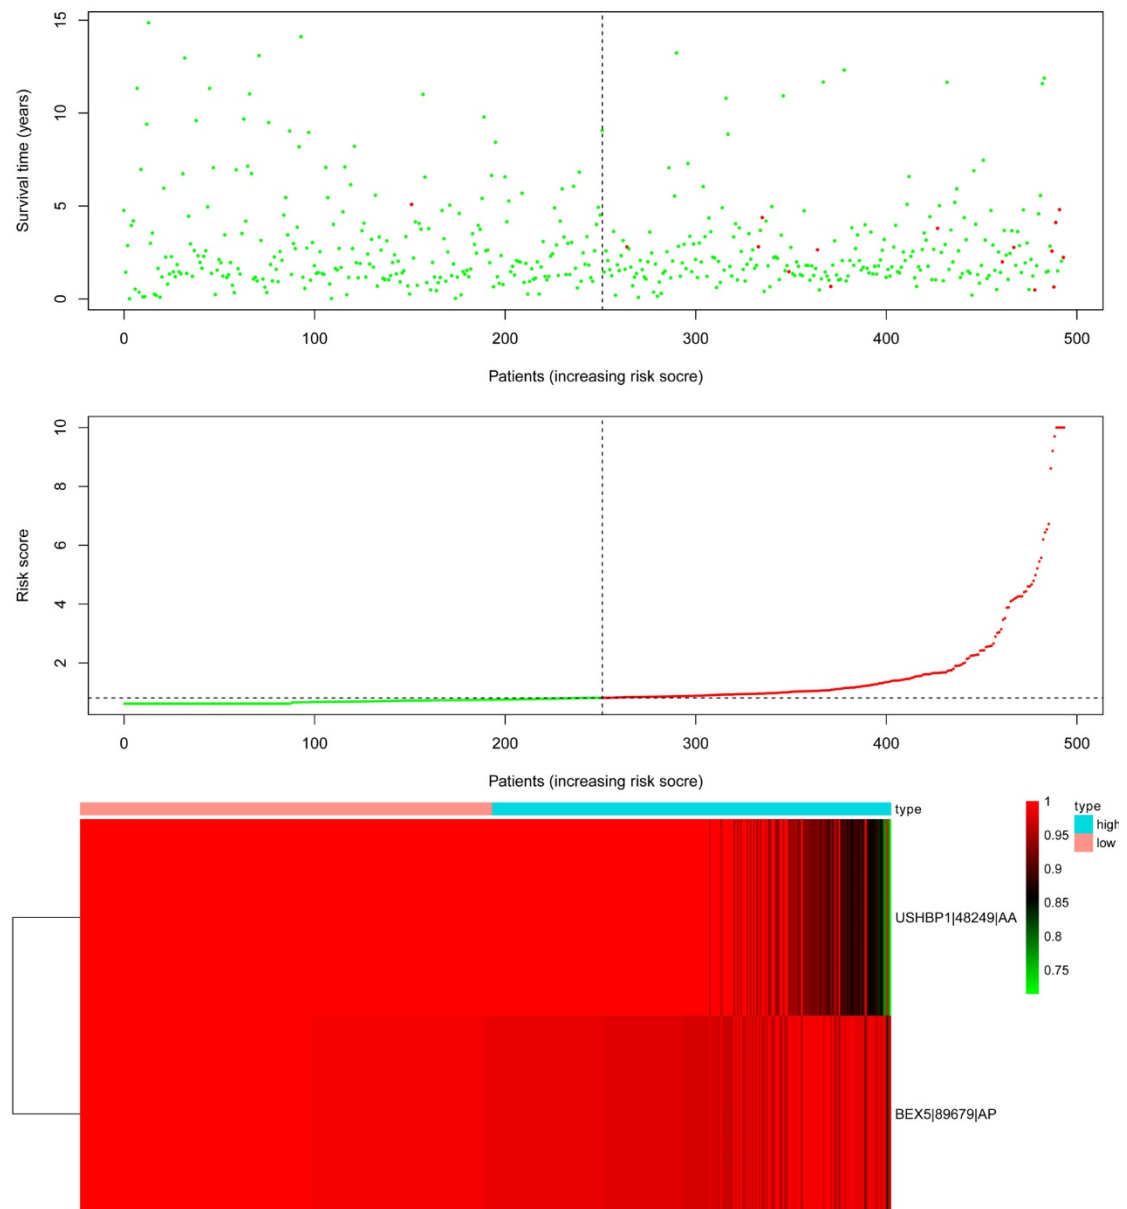

Supplement: 41598_2021_84403_MOESM1_ESM.pdf [file 41598_2021_84403_MOESM1_ESM.pdf]
