# Supplementary material for: Alternative splicing events implicated in carcinogenesis and prognosis of thyroid gland cancer
Source: PubMed Central journal article supplement (PMC7921437; doi:10.1038/s41598-021-84403-6), 2021-03-01
Supplement: 41598_2021_84403_MOESM2_ESM.pdf [file 41598_2021_84403_MOESM2_ESM.pdf]

| id                | z        | HR       | HR.95L   | HR.95H   | pvalue   |
|-------------------|----------|----------|----------|----------|----------|
| GALNTL6 71169 AT  | 4.768496 | 664.3407 | 45.95384 | 9604.173 | 1.86E-06 |
| SRSF5 28161 AD    | 4.571637 | 1.59E+08 | 48524.59 | 5.24E+11 | 4.84E-06 |
| AKAP8L 48080 ES   | -4.52571 | 1.58E-05 | 1.32E-07 | 0.001898 | 6.02E-06 |
| PGPEP1 48422 ES   | 4.482982 | 14397452 | 10682.59 | 1.94E+10 | 7.36E-06 |
| DNP1 76257 RI     | 4.458243 | 1.51E+17 | 4.24E+09 | 5.41E+24 | 8.26E-06 |
| MAP1LC3A 59029 AP | -4.44407 | 3.83E-09 | 7.44E-13 | 1.97E-05 | 8.83E-06 |
| TRAPPC3 1754 AD   | 4.440502 | 1.68E+10 | 515781.3 | 5.49E+14 | 8.97E-06 |
| CHMP2A 52481 AP   | -4.35995 | 4.05E-09 | 6.83E-13 | 2.40E-05 | 1.30E-05 |
| APH1B 31024 ES    | -4.33299 | 3.19E-16 | 3.13E-23 | 3.26E-09 | 1.47E-05 |
| USHBP1 48249 AA   | -4.3258  | 1.33E-06 | 2.88E-09 | 0.00061  | 1.52E-05 |
| SULF2 59729 AA    | -4.32368 | 8.18E-29 | 1.52E-41 | 4.41E-16 | 1.53E-05 |
| CACNB1 40626 AT   | -4.30182 | 0.000154 | 2.81E-06 | 0.008397 | 1.69E-05 |
| BEX5 89679 AP     | -4.29459 | 9.55E-10 | 7.30E-14 | 1.25E-05 | 1.75E-05 |
| PDCD10 67560 ES   | 4.28643  | 4369.352 | 94.58917 | 201833.2 | 1.82E-05 |
| MRPS35 20898 ES   | -4.20204 | 6.28E-16 | 5.09E-23 | 7.74E-09 | 2.65E-05 |
| MED31 38769 AP    | -4.11002 | 8.38E-18 | 6.03E-26 | 1.17E-09 | 3.96E-05 |
| SPTBN1 53578 AT   | -4.09106 | 1.43E-31 | 2.40E-46 | 8.57E-17 | 4.29E-05 |
| CHMP2A 52483 AP   | 4.082702 | 4.38E+08 | 31128.6  | 6.17E+12 | 4.45E-05 |
| MAP4 64551 AA     | -4.07677 | 2.16E-09 | 1.47E-13 | 3.17E-05 | 4.57E-05 |
| GALNTL6 71170 AT  | -4.04031 | 0.002844 | 0.000166 | 0.04887  | 5.34E-05 |
| MUTYH 2603 ES     | -4.03795 | 4.96E-11 | 4.93E-16 | 4.98E-06 | 5.39E-05 |
| SUGP1 48620 ES    | -4.03559 | 6.27E-05 | 5.71E-07 | 0.006894 | 5.45E-05 |
| MYL12A 44489 AP   | -4.01658 | 0.001133 | 4.14E-05 | 0.031022 | 5.90E-05 |
| DCTN3 86189 ES    | -4.0079  | 1.18E-05 | 4.61E-08 | 0.003036 | 6.13E-05 |
| PCM1 82840 ES     | -3.93907 | 2.96E-05 | 1.65E-07 | 0.005302 | 8.18E-05 |
| FOXRED1 19377 ES  | 3.914589 | 468.3061 | 21.54982 | 10176.91 | 9.06E-05 |
| FN1 57394 AA      | 3.903323 | 62738494 | 7623.973 | 5.16E+11 | 9.49E-05 |
| KAT5 16912 AP     | 3.902028 | 22060.32 | 145.1587 | 3352590  | 9.54E-05 |
| KAT5 16911 AP     | -3.89967 | 4.54E-05 | 2.98E-07 | 0.006916 | 9.63E-05 |
| ADORA3 4175 AT    | 3.892528 | 526.7705 | 22.4508  | 12359.79 | 9.92E-05 |
| ADORA3 4174 AT    | -3.89253 | 0.001898 | 8.09E-05 | 0.044542 | 9.92E-05 |
| TPM2 86278 ME     | -3.88442 | 0.00411  | 0.000257 | 0.065737 | 0.000103 |
| C19orf70 46865 AP | -3.87183 | 2.49E-11 | 1.07E-16 | 5.80E-06 | 0.000108 |
| C19orf70 46864 AP | 3.871695 | 4.02E+10 | 172229.5 | 9.39E+15 | 0.000108 |
| NDUFAF6 84593 AT  | -3.86624 | 2.38E-23 | 8.09E-35 | 7.01E-12 | 0.000111 |
| TPM2 86276 AT     | -3.84791 | 0.005143 | 0.000351 | 0.07534  | 0.000119 |
| NAP1L4 13938 ES   | 3.845235 | 2.77E+08 | 13788.68 | 5.58E+12 | 0.00012  |
| MRPL22 74297 ES   | -3.83525 | 6.57E-16 | 1.14E-23 | 3.77E-08 | 0.000125 |
| DECR1 84407 ES    | 3.818454 | 119.2356 | 10.24739 | 1387.391 | 0.000134 |
| FOLH1 15817 ES    | -3.81746 | 0.00068  | 1.61E-05 | 0.028762 | 0.000135 |
| RFESD 72811 AP    | 3.751415 | 54.03907 | 6.721054 | 434.4885 | 0.000176 |
| HYDIN 37421 ES    | -3.7082  | 0.007876 | 0.000609 | 0.10191  | 0.000209 |
| PIAS3 7291 AT     | -3.70772 | 2.32E-26 | 6.51E-40 | 8.24E-13 | 0.000209 |
| MORF4L2 89772 ES  | -3.69012 | 2.80E-06 | 3.14E-09 | 0.00249  | 0.000224 |
| SEC24C 12227 ES   | 3.66828  | 156142.4 | 262.1923 | 92986883 | 0.000244 |
| EEF1D 85436 AP    | -3.66804 | 3.12E-08 | 3.05E-12 | 0.00032  | 0.000244 |
| RFESD 72810 AP    | -3.64609 | 0.019659 | 0.002378 | 0.162504 | 0.000266 |
| MPV17 52961 AP    | -3.63823 | 9.46E-14 | 9.12E-21 | 9.82E-07 | 0.000275 |
| DTNB 52870 ES     | -3.6268  | 1.44E-12 | 5.75E-19 | 3.61E-06 | 0.000287 |
| MAGIX 89092 RI    | 3.622995 | 137.6679 | 9.588907 | 1976.497 | 0.000291 |
| TLE3 31424 ES     | -3.59974 | 3.61E-11 | 7.44E-17 | 1.75E-05 | 0.000319 |
| PHC2 1670 AP      | -3.5965  | 0.00273  | 0.000109 | 0.068136 | 0.000323 |
| PHC2 1671 AP      | 3.58153  | 363.3206 | 14.42752 | 9149.31  | 0.000342 |
| GMPR2 26918 RI    | 3.574447 | 3545390  | 908.4677 | 1.38E+10 | 0.000351 |
| PPIH 2096 AP      | -3.56651 | 5.17E-09 | 1.45E-13 | 0.000185 | 0.000362 |
| ICAM2 43038 AP    | 3.560748 | 33818.82 | 108.6791 | 10523755 | 0.00037  |
| ICAM2 43039 AP    | -3.56071 | 2.96E-05 | 9.50E-08 | 0.009202 | 0.00037  |

|                   |          |          |          |          |          |
|-------------------|----------|----------|----------|----------|----------|
| C11orf74 15436 AP | -3.53995 | 4.97E-05 | 2.06E-07 | 0.012002 | 0.0004   |
| C11orf74 15435 AP | 3.539924 | 20110.13 | 83.31554 | 4854044  | 0.0004   |
| HMGA1 75775 ES    | -3.53511 | 0.030435 | 0.00439  | 0.210976 | 0.000408 |
| FAM84A 52720 ES   | 3.534721 | 2157.861 | 30.57341 | 152301.1 | 0.000408 |
| CCDC74A 55385 AT  | -3.53367 | 4.80E-06 | 5.38E-09 | 0.004277 | 0.00041  |
| LDHA 14634 ES     | -3.52517 | 9.76E-09 | 3.43E-13 | 0.000277 | 0.000423 |
| CFLAR 56792 AT    | 3.523132 | 1.82E+13 | 764352.2 | 4.33E+20 | 0.000426 |
| YPEL4 15880 RI    | 3.48036  | 11.69854 | 2.928286 | 46.7358  | 0.000501 |
| PLEKHA4 50820 ES  | -3.47873 | 0.000279 | 2.77E-06 | 0.028065 | 0.000504 |
| MORF4L2 89774 ES  | -3.47483 | 0.004597 | 0.000221 | 0.095707 | 0.000511 |
| MASTL 11063 ES    | -3.4705  | 0.000368 | 4.23E-06 | 0.032    | 0.000519 |
| POLM 79444 AA     | -3.4578  | 4.54E-05 | 1.57E-07 | 0.013149 | 0.000545 |
| TMSB4X 88496 RI   | -3.45766 | 1.26E-05 | 2.10E-08 | 0.00754  | 0.000545 |
| TRMT10B 86424 AT  | -3.45204 | 1.81E-07 | 2.69E-11 | 0.001218 | 0.000556 |
| TRMT10B 86423 AT  | 3.452011 | 5526526  | 820.8418 | 3.72E+10 | 0.000556 |
| SP140 57871 AT    | 3.449762 | 41.9161  | 5.019192 | 350.0483 | 0.000561 |
| SEC14L1 43712 AA  | -3.44294 | 9.64E-24 | 7.61E-37 | 1.22E-10 | 0.000575 |
| PTS 18764 ES      | -3.43826 | 5.56E-09 | 1.09E-13 | 0.000282 | 0.000585 |
| PLCB2 29965 ES    | -3.43404 | 1.46E-05 | 2.55E-08 | 0.008408 | 0.000595 |
| C11orf74 15441 ES | 3.43381  | 138.9292 | 8.312296 | 2322.019 | 0.000595 |
| RAP1A 4176 AP     | 3.424157 | 3124.737 | 31.21806 | 312767   | 0.000617 |
| SCD5 69716 AT     | -3.41915 | 9.82E-11 | 1.80E-16 | 5.36E-05 | 0.000628 |
| IQCA1 58093 ES    | -3.40816 | 3.00E-07 | 5.31E-11 | 0.001691 | 0.000654 |
| SCRN2 42115 AP    | -3.40204 | 1.38E-05 | 2.18E-08 | 0.008699 | 0.000669 |
| SCRN2 42116 AP    | 3.402036 | 72614.97 | 114.9518 | 45870820 | 0.000669 |
| ZNF407 45821 AT   | -3.40116 | 2.78E-16 | 3.02E-25 | 2.56E-07 | 0.000671 |
| MKRN1 81998 AP    | -3.39559 | 3.81E-09 | 5.26E-14 | 0.000276 | 0.000685 |
| DENND3 85329 ES   | -3.38896 | 2.55E-06 | 1.49E-09 | 0.004381 | 0.000702 |
| SHROOM4 89139 AP  | 3.388611 | 14.70205 | 3.105772 | 69.59635 | 0.000702 |
| C2CD3 17760 AT    | -3.38627 | 1.04E-06 | 3.58E-10 | 0.00302  | 0.000709 |
| LUC7L 32849 AD    | 3.380954 | 135.5039 | 7.871245 | 2332.707 | 0.000722 |
| SLC25A35 39157 RI | -3.37871 | 4.60E-09 | 6.71E-14 | 0.000316 | 0.000728 |
| USP38 70697 AT    | -3.37665 | 1.11E-08 | 2.67E-13 | 0.000459 | 0.000734 |
| TM4SF18 67217 AP  | 3.376637 | 5264.799 | 36.41759 | 761118.9 | 0.000734 |
| C2CD3 17761 AT    | 3.373388 | 820706.5 | 300.6074 | 2.24E+09 | 0.000742 |
| CENPM 62469 ES    | -3.37302 | 7.98E-07 | 2.28E-10 | 0.002789 | 0.000743 |
| BTBD11 24190 AP   | 3.368431 | 39.19647 | 4.636562 | 331.3583 | 0.000756 |
| MMAB 24330 ES     | 3.366334 | 43.5433  | 4.838382 | 391.8704 | 0.000762 |
| MORF4L2 89771 ES  | -3.3629  | 0.011637 | 0.000868 | 0.155996 | 0.000771 |
| LONP1 46920 RI    | -3.33785 | 1.55E-11 | 6.94E-18 | 3.45E-05 | 0.000844 |
| CYB5R2 14205 AP   | -3.33388 | 0.000525 | 6.19E-06 | 0.044493 | 0.000856 |
| TPM3 7785 AP      | -3.32924 | 4.66E-05 | 1.31E-07 | 0.01653  | 0.000871 |
| ELP2 45235 ES     | -3.32841 | 3.64E-05 | 8.85E-08 | 0.014958 | 0.000873 |
| ELMO2 59685 AA    | -3.32832 | 0.000444 | 4.72E-06 | 0.041863 | 0.000874 |
| DPYSL3 73958 AP   | 3.313645 | 68.95911 | 5.637625 | 843.5038 | 0.000921 |
| DPYSL3 73957 AP   | -3.31288 | 0.014507 | 0.001186 | 0.177511 | 0.000923 |
| NSL1 9746 ES      | 3.311022 | 34779.74 | 71.29877 | 16965658 | 0.00093  |
| VPS13D 706 AP     | 3.305177 | 18.54388 | 3.282161 | 104.7711 | 0.000949 |
| SEPT11 69618 AT   | 3.297266 | 1.44E+10 | 13179.85 | 1.57E+16 | 0.000976 |
| CCDC91 99554 ES   | -3.28343 | 1.22E-05 | 1.43E-08 | 0.010463 | 0.001026 |
| ATG13 15599 ES    | 3.28174  | 14205.1  | 47.03991 | 4289651  | 0.001032 |
| FNTA 83754 AD     | 3.278049 | 34188.86 | 66.53491 | 17567898 | 0.001045 |
| NAT9 43295 ES     | -3.27394 | 1.10E-11 | 3.02E-18 | 4.00E-05 | 0.001061 |
| FN1 57397 ES      | 3.273291 | 1242.332 | 17.43758 | 88509.38 | 0.001063 |
| XRN2 58833 AP     | -3.27191 | 4.40E-15 | 1.10E-23 | 1.75E-06 | 0.001068 |
| WDR6 64798 ES     | -3.26906 | 2.54E-07 | 2.82E-11 | 0.002286 | 0.001079 |
| DMKN 49196 ES     | -3.26711 | 4.70E-05 | 1.19E-07 | 0.018549 | 0.001087 |
| VPS13D 704 AP     | -3.26588 | 0.011487 | 0.000787 | 0.167625 | 0.001091 |

|                   |          |           |           |          |          |
|-------------------|----------|-----------|-----------|----------|----------|
| MMADHC 55560 AP   | -3.26524 | 2.78E-08  | 8.09E-13  | 0.000954 | 0.001094 |
| NFATC1 46245 ES   | -3.26387 | 1.04E-11  | 2.63E-18  | 4.09E-05 | 0.001099 |
| ARIH1 31555 ES    | -3.25646 | 1.65E-17  | 1.31E-27  | 2.08E-07 | 0.001128 |
| CYB5R2 14204 AP   | 3.254309 | 1702.966  | 19.28219  | 150402.8 | 0.001137 |
| SHROOM4 89138 AP  | -3.25314 | 0.075395  | 0.015884  | 0.35787  | 0.001141 |
| CASP8 56824 ES    | -3.25207 | 0.000163  | 8.51E-07  | 0.031272 | 0.001146 |
| CCDC53 24021 ME   | -3.24934 | 0.009606  | 0.000583  | 0.15829  | 0.001157 |
| CKAP2 26001 AT    | -3.24456 | 1.71E-09  | 8.62E-15  | 0.000338 | 0.001176 |
| ERG 60587 AP      | 3.244089 | 173.8469  | 7.70437   | 3922.804 | 0.001178 |
| SRSF5 28162 AD    | 3.243106 | 55432.99  | 75.31511  | 40799477 | 0.001182 |
| SEPT11 69616 AT   | -3.23706 | 1.51E-10  | 1.71E-16  | 0.000133 | 0.001208 |
| ZNF223 50275 ES   | 3.235686 | 16.52802  | 3.022062  | 90.39374 | 0.001214 |
| WDR74 16457 ES    | -3.23518 | 8.65E-24  | 9.22E-38  | 8.11E-10 | 0.001216 |
| TPM1 30979 AP     | 3.234242 | 98.99982  | 6.113245  | 1603.234 | 0.00122  |
| ARMCX4 89644 AP   | 3.231204 | 46.23641  | 4.519063  | 473.0639 | 0.001233 |
| C19orf47 49883 AD | 3.228169 | 443.5202  | 10.96113  | 17946.15 | 0.001246 |
| STXBP5 78057 ES   | 3.227956 | 36.19022  | 4.094862  | 319.8476 | 0.001247 |
| ATP5C1 10726 ES   | -3.22362 | 1.33E-07  | 8.74E-12  | 0.002014 | 0.001266 |
| TMEM161B 72731 AT | -3.22229 | 0.000915  | 1.30E-05  | 0.06452  | 0.001272 |
| TMEM161B 72730 AT | 3.222242 | 1092.471  | 15.49757  | 77011.57 | 0.001272 |
| S100A5 7709 AP    | 3.217233 | 42.7841   | 4.340025  | 421.767  | 0.001294 |
| ANK3 11842 AP     | -3.21679 | 0.024276  | 0.002519  | 0.233925 | 0.001296 |
| IL1R1 54773 AP    | 3.214664 | 152.0707  | 7.106632  | 3254.071 | 0.001306 |
| ARMCX4 89643 AP   | -3.21264 | 0.021793  | 0.002111  | 0.224943 | 0.001315 |
| UGP2 53757 ES     | 3.205183 | 6924.188  | 31.04489  | 1544357  | 0.00135  |
| DIP2A 60939 AT    | 3.199402 | 77546022  | 1138.649  | 5.28E+12 | 0.001377 |
| PDE4D 72138 AP    | 3.194542 | 32.28732  | 3.829901  | 272.1926 | 0.001401 |
| NR1H3 15694 AP    | 3.181302 | 3172.586  | 22.09185  | 455611.6 | 0.001466 |
| STAT3 41040 AA    | 3.173961 | 12244.19  | 36.60817  | 4095263  | 0.001504 |
| SMIM12 1697 AP    | -3.17044 | 1.92E-14  | 6.35E-23  | 5.79E-06 | 0.001522 |
| MYL12A 44492 AD   | -3.16571 | 1.97E-23  | 1.73E-37  | 2.25E-09 | 0.001547 |
| MAGIX 89091 ES    | -3.16393 | 0.01353   | 0.000941  | 0.194492 | 0.001557 |
| TM4SF18 67218 AP  | -3.15886 | 0.000277  | 1.71E-06  | 0.044622 | 0.001584 |
| CDK11A 214 AD     | 3.15882  | 1064.059  | 14.08684  | 80374.38 | 0.001584 |
| NEXN 3539 RI      | -3.15421 | 1.40E-05  | 1.35E-08  | 0.014525 | 0.001609 |
| LCMT1 35668 ES    | -3.1468  | 2.97E-28  | 2.13E-45  | 4.15E-11 | 0.001651 |
| EIF4H 80063 ES    | 3.145897 | 13427371  | 486.5115  | 3.71E+11 | 0.001656 |
| PCGF3 68403 AA    | -3.14541 | 8.96E-09  | 8.67E-14  | 0.000927 | 0.001659 |
| AUTS2 79911 ES    | -3.14458 | 0.001287  | 2.03E-05  | 0.081501 | 0.001663 |
| FAM65B 75542 AT   | -3.14105 | 0.001436  | 2.42E-05  | 0.085327 | 0.001683 |
| ZNF720 36287 RI   | 3.138432 | 399.1222  | 9.477733  | 16807.66 | 0.001699 |
| PLK3 2578 ES      | -3.13796 | 5.22E-06  | 2.62E-09  | 0.0104   | 0.001701 |
| COQ2 69778 ES     | -3.13619 | 1.14E-20  | 3.92E-33  | 3.31E-08 | 0.001712 |
| DAZAP1 46478 AA   | 3.135122 | 2.31E+11  | 18187.18  | 2.94E+18 | 0.001718 |
| BCAS3 42872 ES    | -3.13507 | 0.000155  | 6.41E-07  | 0.037296 | 0.001718 |
| SMAP1 76647 ES    | 3.132244 | 546.9766  | 10.58566  | 28263.09 | 0.001735 |
| LUC7L 32850 ES    | 3.128692 | 36.32551  | 3.826658  | 344.8289 | 0.001756 |
| CCDC66 65343 AT   | -3.12747 | 0.000618  | 6.02E-06  | 0.063395 | 0.001763 |
| FN1 57396 ES      | 3.126625 | 4506.673  | 23.08825  | 879672.5 | 0.001768 |
| INADL 3238 AT     | 3.117651 | 127319    | 78.6349   | 2.06E+08 | 0.001823 |
| FGD4 21032 AT     | -3.11437 | 7.89E-08  | 2.67E-12  | 0.002329 | 0.001843 |
| USP36 43913 AT    | -3.10662 | 3.45E-06  | 1.24E-09  | 0.009641 | 0.001892 |
| EPB41L1 59270 AA  | 3.105602 | 1173.03   | 13.55969  | 101477.1 | 0.001899 |
| RGS6 28207 AT     | -3.09686 | 4.79E-08  | 1.11E-12  | 0.002055 | 0.001956 |
| FAM129B 87639 AP  | -3.0933  | 2.40E-17  | 7.07E-28  | 8.14E-07 | 0.001979 |
| CPSF7 16199 AD    | -3.09013 | 5.80E-161 | 1.35E-262 | 2.49E-59 | 0.002001 |
| ARV1 10264 AD     | -3.08102 | 1.15E-38  | 8.47E-63  | 1.57E-14 | 0.002063 |
| PSMC3IP 41080 AD  | 3.078103 | 43.16368  | 3.926147  | 474.5374 | 0.002083 |

|                  |          |          |          |          |          |
|------------------|----------|----------|----------|----------|----------|
| USHBP1 48250 ES  | -3.07234 | 0.000274 | 1.46E-06 | 0.05132  | 0.002124 |
| GSTT1 61366 ES   | -3.07168 | 1.25E-14 | 1.67E-23 | 9.28E-06 | 0.002129 |
| MORF4L2 89775 ES | -3.07139 | 1.50E-07 | 6.62E-12 | 0.003392 | 0.002131 |
| IRF5 81734 AD    | -3.06858 | 3.35E-05 | 4.64E-08 | 0.024168 | 0.002151 |
| SULT1A1 35820 ES | 3.068368 | 172.8294 | 6.431425 | 4644.381 | 0.002152 |
| KLHL7 78948 AP   | -3.06747 | 1.03E-08 | 8.16E-14 | 0.001308 | 0.002159 |
| PHF19 87400 AP   | 3.067154 | 61.6975  | 4.428493 | 859.5657 | 0.002161 |
| TOM1L1 42551 AA  | -3.0625  | 4.81E-05 | 8.28E-08 | 0.027886 | 0.002195 |
| RBCK1 58452 AD   | -3.06226 | 4.77E-11 | 1.18E-17 | 0.000193 | 0.002197 |
| S100A5 7710 AP   | -3.06165 | 0.026557 | 0.002602 | 0.270997 | 0.002201 |
| EIF3E 84876 ES   | -3.06145 | 0.055145 | 0.008626 | 0.352535 | 0.002203 |
| PHF19 87399 AP   | -3.05789 | 0.01632  | 0.001167 | 0.228181 | 0.002229 |
| CCDC90B 18069 AD | 3.055456 | 17695.22 | 33.34349 | 9390764  | 0.002247 |
| MTMR11 7415 ES   | -3.05506 | 2.29E-07 | 1.26E-11 | 0.00417  | 0.00225  |
| GPR97 36593 AT   | -3.05214 | 2.24E-08 | 2.75E-13 | 0.001832 | 0.002272 |
| NAPA 50659 ES    | -3.05162 | 4.75E-32 | 3.62E-52 | 6.23E-12 | 0.002276 |
| TMEM66 83266 ES  | -3.04724 | 0.000806 | 8.26E-06 | 0.078743 | 0.002309 |
| MAP2 57224 ES    | -3.04195 | 0.000662 | 5.93E-06 | 0.074016 | 0.002351 |
| USP4 64850 AT    | -3.03956 | 3.14E-10 | 2.34E-16 | 0.000422 | 0.002369 |
| WWP2 37322 ES    | 3.037062 | 1186.071 | 12.30942 | 114283.5 | 0.002389 |
| DNAJC19 67760 ES | -3.03686 | 4.66E-08 | 8.64E-13 | 0.002513 | 0.002391 |
| CITED1 89450 AP  | 3.033108 | 26421.66 | 36.68879 | 19027728 | 0.00242  |
| SOX7 82607 AP    | -3.03294 | 0.00201  | 3.63E-05 | 0.111156 | 0.002422 |
| GUSB 79857 ES    | -3.02929 | 0.001622 | 2.54E-05 | 0.103562 | 0.002451 |
| ELMO1 79267 AP   | -3.02902 | 0.031754 | 0.003407 | 0.295956 | 0.002453 |
| CREB1 57176 AT   | -3.02739 | 2.17E-12 | 6.10E-20 | 7.72E-05 | 0.002467 |
| FLNB 65418 ES    | -3.02698 | 2.00E-17 | 3.07E-28 | 1.30E-06 | 0.00247  |
| PRSS23 18202 AT  | 3.017357 | 20743.39 | 32.56819 | 13211914 | 0.00255  |
| PRSS23 18201 AT  | -3.01618 | 4.83E-05 | 7.58E-08 | 0.030807 | 0.00256  |
| PLCD4 57506 ES   | -3.01593 | 0.044739 | 0.00594  | 0.336948 | 0.002562 |
| SPTBN4 49912 AT  | 3.015783 | 130.1044 | 5.498053 | 3078.756 | 0.002563 |
| ELMO1 79266 AP   | 3.014488 | 13.52601 | 2.487162 | 73.55889 | 0.002574 |
| ZNF415 51674 ES  | 3.006671 | 33.13955 | 3.382794 | 324.6518 | 0.002641 |
| TPM1 30980 AP    | -3.00657 | 0.00971  | 0.000473 | 0.199225 | 0.002642 |
| ACOT8 59626 ES   | 3.005682 | 28816.53 | 35.60989 | 23319156 | 0.00265  |
| RAP1A 4178 AP    | -3.00485 | 0.000779 | 7.32E-06 | 0.083011 | 0.002657 |
| ZDHHC4 78750 ES  | 3.000422 | 95661.12 | 53.35466 | 1.72E+08 | 0.002696 |
| CABIN1 61387 AP  | 2.998667 | 305.4924 | 7.257296 | 12859.55 | 0.002712 |
| C8orf59 84338 ES | 2.998652 | 2901915  | 173.2115 | 4.86E+10 | 0.002712 |
| SOX7 82608 AP    | 2.997333 | 457.885  | 8.334528 | 25155.43 | 0.002724 |
| AGO3 1741 AT     | -2.99725 | 0.000276 | 1.30E-06 | 0.058622 | 0.002724 |
| AGR2 78873 AD    | 2.996036 | 556527.5 | 97.02236 | 3.19E+09 | 0.002735 |
| SPATA9 72817 AT  | -2.99155 | 0.022075 | 0.001815 | 0.268485 | 0.002776 |
| SPATA9 72815 AT  | 2.990047 | 45.24301 | 3.718296 | 550.5021 | 0.002789 |
| GRAMD3 73157 AP  | -2.98803 | 4.93E-06 | 1.63E-09 | 0.014927 | 0.002808 |
| FBXW7 70849 AP   | -2.98788 | 0.019337 | 0.001453 | 0.257316 | 0.002809 |
| CEP57 18385 AP   | -2.98519 | 7.45E-05 | 1.45E-07 | 0.038224 | 0.002834 |
| MLX 41073 AD     | 2.984921 | 1.25E+08 | 602.4397 | 2.58E+13 | 0.002837 |
| PAM16 33651 AT   | -2.98051 | 4.50E-11 | 7.06E-18 | 0.000286 | 0.002878 |
| PAM16 33652 AT   | 2.980474 | 2.22E+10 | 3490.029 | 1.42E+17 | 0.002878 |
| STXBP2 47123 AP  | 2.979008 | 76.17515 | 4.402722 | 1317.97  | 0.002892 |
| STXBP2 47122 AP  | -2.97901 | 0.013128 | 0.000759 | 0.227133 | 0.002892 |
| TK2 36723 RI     | -2.9785  | 0.017497 | 0.001221 | 0.250705 | 0.002897 |
| SCN1B 49017 AA   | 2.978051 | 6E+18    | 2628074  | 1.37E+31 | 0.002901 |
| RFXANK 48606 AP  | -2.9773  | 1.34E-07 | 3.99E-12 | 0.004478 | 0.002908 |
| RFXANK 48607 AP  | 2.977295 | 7483878  | 223.2873 | 2.51E+11 | 0.002908 |
| TMEM116 24566 ES | 2.976419 | 127.2451 | 5.232876 | 3094.153 | 0.002916 |
| PUS1 25231 AD    | -2.9696  | 0.00344  | 8.14E-05 | 0.145358 | 0.002982 |

|                   |          |          |          |          |          |
|-------------------|----------|----------|----------|----------|----------|
| GALK1 43493 AT    | 2.969535 | 683.0633 | 9.197058 | 50730.95 | 0.002983 |
| GALK1 43494 AT    | -2.96953 | 0.001464 | 1.97E-05 | 0.108731 | 0.002983 |
| USP15 22830 ES    | 2.9682   | 1625.313 | 12.32222 | 214380.3 | 0.002995 |
| ZNF773 52278 AT   | 2.966175 | 69503.53 | 43.90828 | 1.1E+08  | 0.003015 |
| ACAA2 45491 AP    | -2.96616 | 8.36E-09 | 3.84E-14 | 0.001819 | 0.003015 |
| ZNF773 52279 AT   | -2.96604 | 1.44E-05 | 9.09E-09 | 0.022786 | 0.003017 |
| ACLY 40961 ES     | -2.96494 | 4.33E-20 | 6.85E-33 | 2.73E-07 | 0.003027 |
| WFDC8 59591 AT    | -2.9631  | 0.000201 | 7.19E-07 | 0.056011 | 0.003046 |
| USP36 43912 AT    | 2.961239 | 157465.4 | 57.18859 | 4.34E+08 | 0.003064 |
| MYO5C 30648 ES    | -2.95903 | 2.78E-18 | 6.52E-30 | 1.18E-06 | 0.003086 |
| TRA2A 78976 ES    | 2.957816 | 211.9163 | 6.09196  | 7371.765 | 0.003098 |
| GPN3 24424 AP     | -2.95659 | 1.10E-12 | 1.31E-20 | 9.32E-05 | 0.003111 |
| SNX17 52998 ES    | -2.95491 | 0.000691 | 5.54E-06 | 0.086274 | 0.003128 |
| INO80C 45173 AT   | -2.95184 | 1.73E-14 | 1.26E-23 | 2.38E-05 | 0.003159 |
| INO80C 45172 AT   | 2.951637 | 5.76E+13 | 41996.03 | 7.91E+22 | 0.003161 |
| GOLT1B 20705 ES   | -2.9508  | 0.005867 | 0.000193 | 0.178099 | 0.003169 |
| ADAMTSL1 85950 AT | 2.949844 | 623.4832 | 8.666831 | 44852.77 | 0.003179 |
| ZNF346 74698 AT   | -2.94981 | 9.72E-08 | 2.13E-12 | 0.004435 | 0.00318  |
| ZNF346 74699 AT   | 2.949117 | 10260030 | 224.6905 | 4.69E+11 | 0.003187 |
| IRF7 13720 RI     | 2.948615 | 331.3492 | 6.998988 | 15686.88 | 0.003192 |
| ZNF707 85473 AP   | -2.9473  | 3.08E-05 | 3.08E-08 | 0.030814 | 0.003206 |
| CACNB3 21469 AP   | 2.946074 | 42.46944 | 3.507115 | 514.284  | 0.003218 |
| CABIN1 61386 AP   | -2.94319 | 1.62E-05 | 1.05E-08 | 0.025118 | 0.003249 |
| PHPT1 88225 ES    | 2.942615 | 1230930  | 108.0838 | 1.4E+10  | 0.003255 |
| CD63 22242 AP     | -2.94027 | 1.14E-17 | 5.82E-29 | 2.25E-06 | 0.003279 |
| TARBP2 22086 ES   | -2.93882 | 3.50E-18 | 7.98E-30 | 1.53E-06 | 0.003295 |
| FAM86C1 17437 ES  | 2.937057 | 103.7284 | 4.684294 | 2296.95  | 0.003313 |
| MTHFS 32161 AD    | 2.936624 | 36234.58 | 32.82988 | 39992377 | 0.003318 |
| MKL2 34066 AP     | -2.93559 | 0.000739 | 6.00E-06 | 0.091071 | 0.003329 |
| ZNF7 85660 AA     | -2.93351 | 0.000648 | 4.80E-06 | 0.087464 | 0.003352 |
| PLEKHA5 20649 ES  | 2.928399 | 243.1828 | 6.152322 | 9612.288 | 0.003407 |
| NFYC 2019 AA      | 2.92639  | 29177.56 | 29.82364 | 28545489 | 0.003429 |
| IQCK 34339 ES     | -2.92374 | 2.09E-11 | 1.44E-18 | 0.000301 | 0.003459 |
| CCDC66 65341 AT   | 2.922051 | 795.4801 | 9.016409 | 70181.89 | 0.003477 |
| SEC31A 69731 ES   | -2.92064 | 0.00366  | 8.48E-05 | 0.157967 | 0.003493 |
| KANK2 47641 AA    | 2.916102 | 513.5416 | 7.740152 | 34072.33 | 0.003544 |
| IFT74 86038 AP    | 2.915018 | 5887     | 17.18457 | 2016737  | 0.003557 |
| SECISBP2 86799 AA | -2.90922 | 0.000334 | 1.52E-06 | 0.073413 | 0.003623 |
| MYPN 11921 AT     | -2.90642 | 0.002078 | 3.23E-05 | 0.133818 | 0.003656 |
| ABC8 82312 ES     | 2.905291 | 128.866  | 4.859588 | 3417.256 | 0.003669 |
| GLRX 72830 AA     | 2.902224 | 418126.5 | 66.84358 | 2.62E+09 | 0.003705 |
| PRPSAP2 39673 ES  | -2.90083 | 0.000348 | 1.60E-06 | 0.075523 | 0.003722 |
| NEDD1 23836 ES    | -2.89968 | 0.002012 | 3.03E-05 | 0.133723 | 0.003735 |
| DTNA 45112 ES     | -2.89917 | 6.97E-06 | 2.27E-09 | 0.021349 | 0.003742 |
| EMC3 63298 AT     | -2.8956  | 5.98E-23 | 5.42E-38 | 6.59E-08 | 0.003784 |
| SYTL3 78285 ES    | -2.89547 | 0.000528 | 3.20E-06 | 0.087331 | 0.003786 |
| TTC9C 16416 ES    | 2.894232 | 271176.4 | 56.73783 | 1.3E+09  | 0.003801 |
| RPS6KC1 9783 ES   | -2.89402 | 0.013098 | 0.000695 | 0.246786 | 0.003803 |
| EVL 29239 AP      | 2.893832 | 16.28663 | 2.460764 | 107.7935 | 0.003806 |
| BOP1 85554 RI     | 2.893563 | 215.2773 | 5.658936 | 8189.584 | 0.003809 |
| RARA 40857 AP     | 2.88461  | 766.478  | 8.406415 | 69885.74 | 0.003919 |
| IDH3G 90494 RI    | 2.882418 | 1.52E+09 | 867.3089 | 2.65E+15 | 0.003946 |
| PACSIN2 62559 ES  | -2.88157 | 0.000269 | 1.01E-06 | 0.072165 | 0.003957 |
| ACLY 40962 AA     | 2.879099 | 553.4423 | 7.5112   | 40778.88 | 0.003988 |
| SEC24B 70325 AA   | -2.87868 | 0.001133 | 1.12E-05 | 0.114797 | 0.003993 |
| PCGF2 40588 ES    | -2.87858 | 3.76E-10 | 1.44E-16 | 0.000983 | 0.003995 |
| CDKN1A 75989 AD   | 2.878506 | 97488.62 | 39.08356 | 2.43E+08 | 0.003996 |
| PAM 72901 ES      | -2.87793 | 2.37E-09 | 3.17E-15 | 0.001774 | 0.004003 |

|                    |          |          |          |          |          |
|--------------------|----------|----------|----------|----------|----------|
| CBWD1 85691 ES     | -2.87643 | 2.21E-16 | 4.75E-27 | 1.03E-05 | 0.004022 |
| UBAC2 26180 ES     | -2.87636 | 3.26E-10 | 1.12E-16 | 0.000949 | 0.004023 |
| IWS1 55221 ES      | -2.87574 | 5.44E-11 | 5.50E-18 | 0.000539 | 0.004031 |
| CTNNAL1 87155 AA   | -2.87395 | 8.37E-16 | 4.37E-26 | 1.60E-05 | 0.004054 |
| ZNF74 61154 ES     | -2.8732  | 0.005055 | 0.000137 | 0.186264 | 0.004063 |
| AKT2 49868 AP      | -2.86754 | 0.022596 | 0.001694 | 0.301334 | 0.004137 |
| AKT2 49869 AP      | 2.867537 | 44.25599 | 3.318552 | 590.1949 | 0.004137 |
| LRRC23 19994 AP    | -2.86679 | 0.000769 | 5.72E-06 | 0.103519 | 0.004147 |
| LRRC23 19997 AP    | 2.866763 | 1299.758 | 9.659626 | 174889.8 | 0.004147 |
| ROGD1 33859 ES     | -2.86422 | 1.42E-06 | 1.42E-10 | 0.014265 | 0.00418  |
| SEC11A 32313 ES    | 2.858297 | 293.9297 | 5.966823 | 14479.18 | 0.004259 |
| TTLL5 28518 AT     | -2.85785 | 1.30E-07 | 2.48E-12 | 0.006871 | 0.004265 |
| EIF4E 70009 AP     | 2.856943 | 193.7948 | 5.225702 | 7186.869 | 0.004277 |
| EIF4E 70010 AP     | -2.85621 | 0.005163 | 0.000139 | 0.191573 | 0.004287 |
| BIN1 55202 ES      | 2.855643 | 5814.605 | 15.16178 | 2229924  | 0.004295 |
| ZBTB45 52479 AD    | 2.854409 | 1263.605 | 9.373626 | 170339.4 | 0.004312 |
| TOP3B 61268 AD     | 2.852906 | 871.1037 | 8.321927 | 91183.4  | 0.004332 |
| HIST1H2BD 75606 AT | -2.85184 | 0.000389 | 1.77E-06 | 0.08583  | 0.004347 |
| IFT74 86040 AP     | -2.85147 | 0.000416 | 1.98E-06 | 0.087711 | 0.004352 |
| DMKN 49144 ES      | -2.84576 | 0.000112 | 2.13E-07 | 0.058915 | 0.004431 |
| FAM185A 81134 ES   | -2.84454 | 0.001915 | 2.57E-05 | 0.142833 | 0.004448 |
| NOLC1 12939 AD     | 2.842289 | 7162.993 | 15.72996 | 3261831  | 0.004479 |
| KLC1 29478 AD      | -2.84197 | 3.98E-05 | 3.68E-08 | 0.043103 | 0.004484 |
| IFIH1 55768 AT     | -2.84184 | 1.11E-07 | 1.77E-12 | 0.006948 | 0.004485 |
| IFIH1 55767 AT     | 2.841836 | 9005757  | 143.9165 | 5.64E+11 | 0.004485 |
| LEF1 70290 AT      | -2.84001 | 1.39E-17 | 3.25E-29 | 5.98E-06 | 0.004511 |
| MIA3 9888 AP       | -2.83919 | 0.004708 | 0.000116 | 0.190251 | 0.004523 |
| MIA3 9887 AP       | 2.838702 | 212.5278 | 5.25371  | 8597.367 | 0.00453  |
| BTBD11 24189 AP    | -2.83779 | 0.022914 | 0.001688 | 0.310971 | 0.004543 |
| EIF3E 84875 ES     | -2.83379 | 0.005818 | 0.000166 | 0.204525 | 0.0046   |
| TJP2 86531 AP      | 2.833494 | 486.1368 | 6.73431  | 35093.28 | 0.004604 |
| IL1R1 54771 AP     | -2.83325 | 0.010522 | 0.000451 | 0.245672 | 0.004608 |
| ATP2A2 24418 RI    | -2.8332  | 0.00015  | 3.41E-07 | 0.066324 | 0.004608 |
| CIRBP 46427 AA     | -2.83093 | 0.001015 | 8.59E-06 | 0.119953 | 0.004641 |
| LIPT1 54676 ES     | 2.830848 | 80.95949 | 3.864213 | 1696.19  | 0.004642 |
| NDRG2 26511 ES     | 2.829869 | 1227.235 | 8.903075 | 169166.8 | 0.004657 |
| PAM 72902 ES       | -2.8298  | 5.89E-05 | 6.93E-08 | 0.050097 | 0.004658 |
| C11orf80 17121 AA  | 2.828712 | 10849.97 | 17.35212 | 6784291  | 0.004674 |
| METTL21A 57191 AT  | 2.82543  | 486.4601 | 6.653916 | 35564.53 | 0.004722 |
| TSR1 38388 AD      | -2.82454 | 4.57E-18 | 4.25E-30 | 4.93E-06 | 0.004735 |
| C19orf44 48172 AA  | -2.82361 | 3.73E-10 | 1.07E-16 | 0.001307 | 0.004749 |
| FAM86C1 17436 ES   | 2.822222 | 451.0436 | 6.470369 | 31441.84 | 0.004769 |
| YAF2 21146 ES      | 2.818367 | 16.52414 | 2.349676 | 116.2063 | 0.004827 |
| TMEM134 17233 AA   | 2.818307 | 8763.092 | 15.87725 | 4836591  | 0.004828 |
| RPS6KC1 9781 RI    | 2.816097 | 383.6051 | 6.102916 | 24111.89 | 0.004861 |
| PDLIM5 69971 AT    | -2.81422 | 0.00034  | 1.31E-06 | 0.088577 | 0.00489  |
| ELP4 14825 ES      | 2.813912 | 1076.147 | 8.319415 | 139203.7 | 0.004894 |
| PFKFB2 9614 AP     | 2.812449 | 2750.051 | 11.02815 | 685770.3 | 0.004917 |
| SP140 57870 AT     | -2.80694 | 0.01664  | 0.000953 | 0.290565 | 0.005002 |
| HOXB3 42198 AT     | -2.80591 | 1.84E-05 | 9.02E-09 | 0.03733  | 0.005018 |
| HOXB3 42197 AT     | 2.805885 | 54492.74 | 26.7865  | 1.11E+08 | 0.005018 |
| USP4 64851 AT      | 2.805583 | 1.68E+10 | 1206.67  | 2.33E+17 | 0.005023 |
| MKNK2 46567 AT     | -2.80481 | 6.83E-20 | 2.77E-33 | 1.69E-06 | 0.005035 |
| ZNF384 19927 AD    | 2.800156 | 28.29965 | 2.726526 | 293.7328 | 0.005108 |
| CHEK2 61544 ES     | 2.800051 | 18.18593 | 2.387553 | 138.5218 | 0.005109 |
| C12orf57 20020 AD  | -2.79831 | 2.90E-13 | 4.79E-22 | 0.000175 | 0.005137 |
| EMC9 26859 RI      | 2.797697 | 1428.151 | 8.803486 | 231682.8 | 0.005147 |
| HNRNP1 74913 AD    | -2.7973  | 1.22E-06 | 8.74E-11 | 0.016965 | 0.005153 |

|                   |          |          |          |          |          |
|-------------------|----------|----------|----------|----------|----------|
| ANK3 11843 AP     | 2.795923 | 29.74136 | 2.75755  | 320.7734 | 0.005175 |
| PCM1 82839 ES     | -2.79243 | 8.99E-05 | 1.30E-07 | 0.062188 | 0.005231 |
| TMUB1 82347 RI    | -2.78972 | 0.003942 | 8.06E-05 | 0.192704 | 0.005275 |
| C6orf1 75776 ES   | -2.78799 | 3.20E-21 | 1.25E-35 | 8.19E-07 | 0.005304 |
| MCRS1 21591 ES    | 2.785898 | 2240159  | 76.32471 | 6.57E+10 | 0.005338 |
| IL32 33385 RI     | 2.784667 | 11896.8  | 16.10548 | 8787929  | 0.005358 |
| KDM4C 85835 ES    | -2.78153 | 1.28E-09 | 6.89E-16 | 0.00236  | 0.00541  |
| GPR64 88618 ES    | -2.77937 | 0.002929 | 4.79E-05 | 0.17912  | 0.005446 |
| RBM38 59898 ES    | -2.77876 | 9.37E-08 | 1.03E-12 | 0.008492 | 0.005457 |
| ZNF438 11137 ES   | 2.777176 | 59.75817 | 3.332138 | 1071.696 | 0.005483 |
| PKP4 55684 ES     | -2.77674 | 2.85E-10 | 5.23E-17 | 0.001558 | 0.005491 |
| PPIA 97441 ES     | 2.774926 | 436.2771 | 5.960275 | 31934.39 | 0.005521 |
| SLC44A5 3480 AT   | 2.768846 | 13.1313  | 2.121773 | 81.26738 | 0.005626 |
| SNX3 77149 AD     | -2.7671  | 6.39E-21 | 3.18E-35 | 1.29E-06 | 0.005656 |
| ZNF205 33452 AA   | -2.7664  | 0.003642 | 6.82E-05 | 0.194586 | 0.005668 |
| NKX2-1 102505 AA  | 2.765791 | 815.9791 | 7.052322 | 94411.73 | 0.005678 |
| SEMA4B 32468 AP   | 2.764866 | 131.8082 | 4.141459 | 4194.993 | 0.005695 |
| PIGG 68356 AT     | -2.76344 | 6.93E-10 | 2.21E-16 | 0.002172 | 0.00572  |
| PIGG 68354 AT     | 2.763434 | 1.44E+09 | 460.2813 | 4.52E+15 | 0.00572  |
| ZNF329 52413 RI   | -2.76268 | 7.58E-17 | 2.77E-28 | 2.07E-05 | 0.005733 |
| HLTF 67208 RI     | -2.7624  | 1.63E-12 | 7.05E-21 | 0.000377 | 0.005738 |
| DPH6 29892 AT     | -2.7614  | 2.55E-09 | 2.02E-15 | 0.003204 | 0.005755 |
| DPH6 29893 AT     | 2.76139  | 3.93E+08 | 312.091  | 4.95E+14 | 0.005756 |
| CPSF7 16201 ES    | -2.75895 | 0.007371 | 0.000225 | 0.241231 | 0.005799 |
| CD320 47212 ES    | 2.758078 | 894.8817 | 7.147624 | 112039.1 | 0.005814 |
| ZSCAN30 45156 AA  | 2.75326  | 148.723  | 4.225971 | 5233.954 | 0.005901 |
| SLC44A5 3481 AT   | -2.75257 | 0.076753 | 0.012337 | 0.477488 | 0.005913 |
| PRICKLE4 76140 AA | 2.750151 | 132.4201 | 4.070901 | 4307.423 | 0.005957 |
| ZNF263 33514 ES   | -2.74906 | 0.013397 | 0.000619 | 0.289984 | 0.005977 |
| NOSTRIN 55840 ES  | -2.74539 | 3.77E-06 | 5.06E-10 | 0.028072 | 0.006044 |
| STAG2 90031 AP    | 2.740489 | 10179344 | 99.05695 | 1.05E+12 | 0.006135 |
| CCDC92 25124 ES   | -2.73923 | 1.99E-07 | 3.19E-12 | 0.012406 | 0.006158 |
| RHOC 4236 ES      | 2.73833  | 29.47931 | 2.616424 | 332.1441 | 0.006175 |
| DUSP4 83257 AP    | -2.73697 | 2.88E-08 | 1.14E-13 | 0.00723  | 0.006201 |
| CCDC120 89057 AP  | 2.733465 | 78.76652 | 3.44046  | 1803.295 | 0.006267 |
| SMIM12 1702 AD    | 2.732487 | 10193753 | 95.80368 | 1.08E+12 | 0.006286 |
| EIF5A 38907 AP    | -2.7284  | 2.00E-06 | 1.61E-10 | 0.024829 | 0.006364 |
| CKMT2 72660 ES    | 2.728335 | 11.1764  | 1.973465 | 63.29574 | 0.006365 |
| TM9SF1 26891 AP   | -2.72775 | 0.001677 | 1.70E-05 | 0.165504 | 0.006377 |
| TM9SF1 26892 AP   | 2.727751 | 596.1623 | 6.042112 | 58822.07 | 0.006377 |
| LYRM1 34421 ES    | -2.72757 | 0.014084 | 0.000658 | 0.301303 | 0.00638  |
| C2orf81 54053 RI  | -2.72756 | 8.09E-06 | 1.78E-09 | 0.0369   | 0.00638  |
| RRM1 14037 ES     | -2.72671 | 3.96E-07 | 9.91E-12 | 0.01584  | 0.006397 |
| FBXL12 47421 ES   | 2.724614 | 96.41181 | 3.604432 | 2578.836 | 0.006438 |
| TSC22D4 80951 AA  | 2.72425  | 2.57E+15 | 21055.98 | 3.14E+26 | 0.006445 |
| DALRD3 64806 AP   | -2.72289 | 0.000123 | 1.89E-07 | 0.080287 | 0.006471 |
| LAT2 80066 ES     | -2.71946 | 3.62E-05 | 2.27E-08 | 0.057477 | 0.006539 |
| CALCRL 56490 ES   | -2.71753 | 0.00186  | 2.00E-05 | 0.173315 | 0.006577 |
| ZNF816 51644 AT   | 2.716173 | 408675.2 | 36.49739 | 4.58E+09 | 0.006604 |
| EIF4A2 96628 ES   | 2.714255 | 100.0185 | 3.596021 | 2781.88  | 0.006642 |
| GTPBP10 80390 ES  | -2.71403 | 5.43E-07 | 1.63E-11 | 0.018171 | 0.006647 |
| PARP9 66442 AT    | -2.71371 | 5.21E-15 | 2.52E-25 | 0.000108 | 0.006653 |
| COPS7A 19945 ES   | 2.712145 | 89.35904 | 3.476363 | 2296.952 | 0.006685 |
| FXR1 67746 ES     | -2.70908 | 1.89E-06 | 1.37E-10 | 0.026146 | 0.006747 |
| FBXO7 61931 AP    | -2.70813 | 0.001382 | 1.18E-05 | 0.162174 | 0.006766 |
| FBXO7 61930 AP    | 2.708127 | 723.8096 | 6.166187 | 84963.42 | 0.006766 |
| MKL2 34070 AT     | -2.70744 | 1.39E-06 | 7.96E-11 | 0.024136 | 0.006781 |
| MED8 2172 AA      | 2.706574 | 201.3058 | 4.32036  | 9379.778 | 0.006798 |

|                    |          |          |          |          |          |
|--------------------|----------|----------|----------|----------|----------|
| TMEM182 54811 AP   | -2.70487 | 0.000914 | 5.74E-06 | 0.145567 | 0.006833 |
| FLAD1 7863 AT      | -2.70438 | 2.51E-13 | 1.85E-22 | 0.00034  | 0.006843 |
| HNRNPA2B1 79039 ES | 2.702662 | 5.66E+08 | 254.2268 | 1.26E+15 | 0.006879 |
| TMM10B 14145 AT    | -2.70212 | 4.10E-17 | 5.32E-29 | 3.16E-05 | 0.00689  |
| FOXK2 44408 ES     | 2.702018 | 911899.2 | 43.32884 | 1.92E+10 | 0.006892 |
| UBE2W 84194 ES     | -2.69985 | 1.65E-09 | 6.96E-16 | 0.00392  | 0.006937 |
| ADCK5 85593 RI     | 2.699178 | 366.206  | 5.036378 | 26627.63 | 0.006951 |
| PTS 18758 AP       | -2.69771 | 5.61E-11 | 2.00E-18 | 0.001572 | 0.006982 |
| BACH1 60322 AP     | 2.697568 | 142.4539 | 3.88048  | 5229.534 | 0.006985 |
| UBBP4 39829 RI     | -2.69324 | 0.000148 | 2.43E-07 | 0.090693 | 0.007076 |
| CLP1 15883 AP      | -2.69157 | 0.001372 | 1.13E-05 | 0.166677 | 0.007112 |
| SLC39A1 7765 AP    | 2.691075 | 416310   | 33.62659 | 5.15E+09 | 0.007122 |
| TRMT10B 86427 AA   | -2.69019 | 0.000902 | 5.46E-06 | 0.149116 | 0.007141 |
| COMMD5 85672 AP    | 2.690101 | 1516.394 | 7.300011 | 314992.8 | 0.007143 |
| COMMD5 85671 AP    | -2.6901  | 0.000659 | 3.17E-06 | 0.136986 | 0.007143 |
| TTLL3 63203 AP     | 2.689276 | 12481.53 | 12.90857 | 12068623 | 0.007161 |
| TTLL3 63199 AP     | -2.68921 | 8.01E-05 | 8.29E-08 | 0.077484 | 0.007162 |
| FBXL12 47431 RI    | 2.688735 | 236.6263 | 4.400281 | 12724.64 | 0.007172 |
| CXorf40A 90313 AD  | -2.68617 | 0.005144 | 0.00011  | 0.240572 | 0.007228 |
| ZNF395 83211 AP    | 2.683564 | 1491.771 | 7.174004 | 310200.5 | 0.007284 |
| SLC35F5 55070 ES   | -2.6825  | 2.84E-05 | 1.35E-08 | 0.059623 | 0.007307 |
| MTFR1L 1216 AD     | 2.680844 | 42.39173 | 2.738901 | 656.1241 | 0.007344 |
| CYP3A5 80708 AT    | 2.676141 | 16.94441 | 2.132586 | 134.6314 | 0.007448 |
| ADAMTSL1 85946 AT  | -2.67576 | 0.005719 | 0.00013  | 0.25122  | 0.007456 |
| PPFIBP1 20888 AT   | -2.67573 | 3.53E-14 | 4.94E-24 | 0.000252 | 0.007457 |
| RGS6 28206 AT      | 2.673936 | 150.5057 | 3.814449 | 5938.462 | 0.007497 |
| TMA16 71020 ES     | -2.67353 | 2.12E-11 | 3.17E-19 | 0.001416 | 0.007506 |
| NDUFA7 47217 AT    | -2.6724  | 0.001393 | 1.12E-05 | 0.173225 | 0.007531 |
| PPIE 1904 AD       | 2.671734 | 2062.292 | 7.63779  | 556843   | 0.007546 |
| TCF3 46537 RI      | -2.6713  | 7.27E-08 | 4.21E-13 | 0.012563 | 0.007556 |
| WDR55 73716 RI     | -2.66715 | 6.83E-06 | 1.09E-09 | 0.042689 | 0.00765  |
| CRTAC1 12748 AT    | -2.66492 | 8.25E-07 | 2.77E-11 | 0.02459  | 0.007701 |
| SFTA3 27259 ES     | 2.664625 | 18235494 | 83.20545 | 4E+12    | 0.007707 |
| RPLP0 24727 AA     | -2.66297 | 0.023586 | 0.001496 | 0.37187  | 0.007745 |
| TLE3 31425 ES      | -2.66255 | 0.002903 | 3.94E-05 | 0.214035 | 0.007755 |
| WDR90 32931 AA     | -2.66234 | 0.000152 | 2.36E-07 | 0.098417 | 0.00776  |
| MTUS1 82815 AP     | 2.659789 | 36.29668 | 2.57289  | 512.0503 | 0.007819 |
| TSPAN4 13794 AP    | 2.65891  | 434039.1 | 30.33423 | 6.21E+09 | 0.007839 |
| TPM3 7789 AT       | -2.65675 | 1.62E-09 | 5.27E-16 | 0.004945 | 0.00789  |
| BAIAP2 44102 ES    | -2.65487 | 1.29E-07 | 1.06E-12 | 0.015723 | 0.007934 |
| FBXL20 40641 AT    | -2.65386 | 4.97E-05 | 3.30E-08 | 0.07496  | 0.007958 |
| FBXL20 40642 AT    | 2.653563 | 20083.39 | 13.32579 | 30267821 | 0.007965 |
| ZNF772 52255 AT    | 2.651782 | 528955.7 | 31.12947 | 8.99E+09 | 0.008007 |
| ZNF772 52253 AT    | -2.65178 | 1.89E-06 | 1.11E-10 | 0.032124 | 0.008007 |
| NWD1 48207 AD      | -2.6511  | 0.025094 | 0.001646 | 0.382623 | 0.008023 |
| GGT1 100018 ES     | 2.649631 | 15054.84 | 12.22924 | 18533303 | 0.008058 |
| PRICKLE4 76139 AA  | -2.64931 | 1.22E-07 | 9.32E-13 | 0.015877 | 0.008066 |
| ERLIN2 83343 AP    | 2.649239 | 16798.59 | 12.56969 | 22450250 | 0.008067 |
| RNH1 13672 AA      | -2.64748 | 0.006822 | 0.00017  | 0.273836 | 0.008109 |
| DZIP3 66036 ES     | -2.64719 | 2.68E-07 | 3.65E-12 | 0.019674 | 0.008116 |
| GOLGA4 63986 ES    | -2.6452  | 3.09E-10 | 2.77E-17 | 0.003438 | 0.008164 |
| INADL 3239 AT      | -2.6438  | 5.31E-05 | 3.60E-08 | 0.07841  | 0.008198 |
| GGT2 121589 ES     | 2.64199  | 126.5183 | 3.488734 | 4588.166 | 0.008242 |
| TG 319464 ES       | 2.641864 | 105.4949 | 3.328303 | 3343.798 | 0.008245 |
| MAGI1 65529 AT     | -2.64157 | 1.49E-23 | 1.72E-40 | 1.29E-06 | 0.008252 |
| ZNF20 47779 AA     | -2.64074 | 0.008668 | 0.000256 | 0.294038 | 0.008273 |
| XBP1 61563 RI      | -2.64043 | 0.009548 | 0.000302 | 0.301584 | 0.00828  |
| FANCD2 63305 AT    | 2.638685 | 70130804 | 104.2606 | 4.72E+13 | 0.008323 |



|                  |          |          |          |          |          |
|------------------|----------|----------|----------|----------|----------|
| ZNF181 48997 AP  | 2.636876 | 71.31195 | 2.990371 | 1700.59  | 0.008367 |
| ZNF181 48996 AP  | -2.63685 | 0.013613 | 0.000558 | 0.331877 | 0.008368 |
| TRIM11 10208 AT  | -2.63684 | 6.84E-18 | 1.19E-30 | 3.92E-05 | 0.008368 |
| ARL6IP4 25034 AD | 2.636379 | 30598.23 | 14.15449 | 66145194 | 0.00838  |
| PTCD2 72456 AT   | -2.63596 | 0.00019  | 3.26E-07 | 0.111166 | 0.00839  |
| PTCD2 72458 AT   | 2.635933 | 5249.105 | 8.994833 | 3063215  | 0.008391 |
| PCNA 58649 AP    | -2.63529 | 0.000176 | 2.83E-07 | 0.109067 | 0.008407 |
| PCNA 58648 AP    | 2.635273 | 5690.518 | 9.168248 | 3531972  | 0.008407 |
| FBLIM1 775 AA    | 2.634954 | 97.71861 | 3.234205 | 2952.48  | 0.008415 |
| MAP9 70916 AA    | -2.63441 | 0.000393 | 1.15E-06 | 0.134346 | 0.008428 |
| PTK2B 83155 AT   | -2.63074 | 8.66E-13 | 8.92E-22 | 0.00084  | 0.00852  |
| LRP2BP 71336 AP  | 2.629944 | 218.708  | 3.945318 | 12124.03 | 0.00854  |
| FAM185A 81137 AD | -2.62887 | 0.037265 | 0.003207 | 0.432985 | 0.008567 |
| LRP2BP 71337 AP  | -2.62837 | 0.004581 | 8.25E-05 | 0.254191 | 0.008579 |
| PRSS16 75702 ES  | -2.62814 | 0.002293 | 2.46E-05 | 0.213254 | 0.008585 |
| SNX15 16730 ES   | -2.62704 | 1.17E-18 | 4.88E-32 | 2.80E-05 | 0.008613 |
| ACOT9 88692 AT   | -2.62554 | 2.87E-08 | 6.72E-14 | 0.012247 | 0.008651 |
| MFF 57806 ES     | -2.62534 | 0.003075 | 4.10E-05 | 0.230835 | 0.008656 |
| DTX2 80174 ES    | -2.62499 | 0.000502 | 1.73E-06 | 0.145962 | 0.008665 |
| PCNXL4 27766 AT  | 2.623179 | 11775516 | 61.34042 | 2.26E+12 | 0.008711 |
| EFCAB6 62586 AT  | -2.62183 | 0.045416 | 0.004502 | 0.458162 | 0.008746 |
| NMRAL1 33737 AD  | -2.62004 | 0.022343 | 0.001301 | 0.38379  | 0.008792 |
| FAM86B1 82688 ES | 2.619488 | 39.71578 | 2.526855 | 624.2318 | 0.008806 |
| ICA1 78786 AT    | -2.61825 | 1.01E-09 | 1.86E-16 | 0.005474 | 0.008838 |
| CLCN3 71153 ES   | -2.61722 | 0.003952 | 6.27E-05 | 0.249176 | 0.008865 |
| FAM86B1 82686 ES | 2.616739 | 27.86325 | 2.305092 | 336.8024 | 0.008877 |
| TSTD1 8524 AP    | -2.61369 | 9.20E-14 | 1.54E-23 | 0.000549 | 0.008957 |
| LOXL3 54112 ES   | -2.61265 | 0.007473 | 0.00019  | 0.294279 | 0.008984 |
| PCNXL4 27767 AT  | -2.6126  | 6.91E-08 | 2.93E-13 | 0.016265 | 0.008986 |
| FAM49B 85146 ES  | -2.61158 | 0.000314 | 7.40E-07 | 0.133691 | 0.009012 |
| MAGED2 89250 RI  | 2.60942  | 574755.8 | 27.13136 | 1.22E+10 | 0.00907  |
| ZNF720 36292 AD  | 2.609213 | 51.0307  | 2.660472 | 978.8236 | 0.009075 |
| FGFR1 83430 ES   | -2.60907 | 0.045668 | 0.004495 | 0.464009 | 0.009079 |
| RAB17 58121 ES   | -2.60904 | 1.01E-11 | 5.54E-20 | 0.001838 | 0.00908  |
| FAM193A 68579 ES | 2.608617 | 2827.559 | 7.21474  | 1108160  | 0.009091 |
| EFCAB6 62585 AT  | 2.607174 | 21.84153 | 2.150138 | 221.8706 | 0.009129 |
| FKBP11 21497 AA  | -2.60682 | 0.000109 | 1.14E-07 | 0.103869 | 0.009139 |
| LIN9 10012 AT    | -2.60545 | 9.18E-10 | 1.46E-16 | 0.005769 | 0.009175 |
| ARMC6 48572 ES   | 2.605411 | 3833.85  | 7.722985 | 1903202  | 0.009176 |
| SYNC 1630 ES     | 2.604591 | 28.93057 | 2.29975  | 363.943  | 0.009198 |
| PRMT5 26673 AD   | -2.60359 | 5.22E-06 | 5.51E-10 | 0.049449 | 0.009225 |
| ELMOD3 54217 RI  | -2.60331 | 1.41E-05 | 3.16E-09 | 0.06333  | 0.009233 |
| ABLIM2 68748 AA  | -2.6026  | 0.002525 | 2.79E-05 | 0.228323 | 0.009252 |
| DDX11 20968 ES   | 2.598777 | 510.9495 | 4.631851 | 56363.93 | 0.009356 |
| CXorf23 88651 ES | 2.598322 | 44.39919 | 2.539385 | 776.2858 | 0.009368 |
| TSPAN14 12373 ES | -2.59785 | 1.85E-07 | 1.54E-12 | 0.022222 | 0.009381 |
| ASPSCR1 44251 AP | 2.594437 | 1778.859 | 6.234852 | 507524.2 | 0.009475 |
| ASPSCR1 44250 AP | -2.59437 | 0.000562 | 1.97E-06 | 0.160415 | 0.009476 |
| CUL4A 26367 AP   | -2.59412 | 0.008435 | 0.000229 | 0.311179 | 0.009483 |
| FAM219B 31801 AD | 2.591775 | 207.8961 | 3.67311  | 11766.81 | 0.009548 |
| CDCP1 64397 AT   | -2.59175 | 7.41E-08 | 3.00E-13 | 0.018277 | 0.009549 |
| SFTA3 121940 ES  | 2.590395 | 153.3066 | 3.403342 | 6905.836 | 0.009587 |
| TANGO2 61112 AP  | 2.590208 | 1809.48  | 6.203282 | 527820.5 | 0.009592 |
| HNRNPH1 74914 AD | -2.58852 | 1.77E-06 | 7.78E-11 | 0.040092 | 0.009639 |
| DCLRE1C 10837 AT | -2.5883  | 1.55E-07 | 1.09E-12 | 0.02224  | 0.009645 |
| DCLRE1C 10838 AT | 2.588289 | 6436830  | 44.96265 | 9.21E+11 | 0.009645 |
| SIAH1 36338 AP   | 2.587594 | 16233.75 | 10.5015  | 25094950 | 0.009665 |
| TCEAL3 89760 AD  | 2.585421 | 2190842  | 34.19012 | 1.4E+11  | 0.009726 |

|                   |          |          |          |          |          |
|-------------------|----------|----------|----------|----------|----------|
| KLC1 29487 AD     | -2.58433 | 0.000302 | 6.46E-07 | 0.141094 | 0.009757 |
| PHKA1 89509 ES    | -2.58393 | 1.78E-07 | 1.35E-12 | 0.023456 | 0.009768 |
| TXN2 62049 AP     | 2.583583 | 32595.87 | 12.28503 | 86486616 | 0.009778 |
| TXN2 62048 AP     | -2.58355 | 3.07E-05 | 1.16E-08 | 0.081411 | 0.009779 |
| CYP3A5 80710 AT   | -2.58228 | 0.062106 | 0.007536 | 0.511861 | 0.009815 |
| CRCP 79875 ES     | -2.58211 | 0.004698 | 8.03E-05 | 0.274825 | 0.00982  |
| DACT3 50576 AT    | -2.58147 | 0.004606 | 7.75E-05 | 0.273801 | 0.009838 |
| DACT3 50577 AT    | 2.58147  | 217.0861 | 3.652241 | 12903.42 | 0.009838 |
| APOD 68181 ES     | -2.58041 | 0.001019 | 5.44E-06 | 0.190803 | 0.009868 |
| PLIN5 46809 AT    | 2.580184 | 8137.836 | 8.709653 | 7603560  | 0.009875 |
| PLIN5 46808 AT    | -2.58018 | 0.000123 | 1.32E-07 | 0.114817 | 0.009875 |
| GLRX 72826 AT     | -2.58013 | 2.83E-22 | 1.21E-38 | 6.62E-06 | 0.009876 |
| MANBAL 59340 ES   | 2.580056 | 958.4239 | 5.207014 | 176411.4 | 0.009878 |
| MUTYH 2652 ES     | -2.58003 | 2.63E-08 | 4.58E-14 | 0.015072 | 0.009879 |
| AP4B1 4309 RI     | 2.579895 | 45.36057 | 2.500856 | 822.751  | 0.009883 |
| MTA3 53367 AT     | -2.57983 | 0.000539 | 1.77E-06 | 0.163934 | 0.009885 |
| MTA3 53366 AT     | 2.579766 | 1855.306 | 6.098933 | 564387.2 | 0.009887 |
| TPM1 30985 AT     | -2.57871 | 9.94E-06 | 1.57E-09 | 0.063051 | 0.009917 |
| FAM228B 52815 ES  | -2.57819 | 0.005117 | 9.28E-05 | 0.282249 | 0.009932 |
| SIX5 95264 AA     | 2.575477 | 104.6748 | 3.038938 | 3605.476 | 0.01001  |
| CCPG1 30723 AP    | 2.574938 | 208.2987 | 3.579099 | 12122.7  | 0.010026 |
| FASTK 82341 ES    | 2.574739 | 3.48E+22 | 241122.4 | 5.02E+39 | 0.010032 |
| ERLIN2 83344 AP   | -2.57215 | 0.000484 | 1.44E-06 | 0.16257  | 0.010107 |
| PPP1R1A 22198 ES  | -2.57178 | 0.002749 | 3.07E-05 | 0.245925 | 0.010118 |
| RPS15 46485 AA    | -2.57051 | 0.011795 | 0.000399 | 0.348328 | 0.010155 |
| PEX26 61024 RI    | -2.57005 | 0.001372 | 9.00E-06 | 0.209142 | 0.010168 |
| SPTBN4 49913 AT   | -2.56847 | 0.002429 | 2.46E-05 | 0.240202 | 0.010215 |
| RAD23B 87146 AP   | 2.56752  | 898.6952 | 4.999394 | 161550.2 | 0.010243 |
| MSANTD1 68631 AT  | 2.567408 | 3064.145 | 6.681205 | 1405283  | 0.010246 |
| C11orf74 15439 ES | -2.56736 | 2.51E-07 | 2.30E-12 | 0.027454 | 0.010248 |
| ARHGEF26 67329 AP | -2.56734 | 0.034399 | 0.002626 | 0.450588 | 0.010248 |
| RAD23B 87147 AP   | -2.56727 | 0.001114 | 6.20E-06 | 0.200162 | 0.01025  |
| HIST4H4 20554 AT  | -2.5669  | 0.006228 | 0.000129 | 0.300938 | 0.010261 |
| HIST4H4 20553 AT  | 2.566898 | 160.5716 | 3.322943 | 7759.163 | 0.010261 |
| INSIG2 55092 ES   | -2.56408 | 9.73E-08 | 4.25E-13 | 0.022285 | 0.010345 |
| P4HA2 73261 ES    | -2.56276 | 4.30E-07 | 5.81E-12 | 0.031806 | 0.010384 |
| TMEM126B 18123 ES | 2.561943 | 93047.63 | 14.706   | 5.89E+08 | 0.010409 |
| KIF1B 602 AT      | -2.56064 | 2.79E-05 | 9.10E-09 | 0.085425 | 0.010448 |
| KIF1B 601 AT      | 2.560636 | 35858.41 | 11.70611 | 1.1E+08  | 0.010448 |
| PHLDB2 66063 AT   | -2.56008 | 2.80E-07 | 2.69E-12 | 0.029101 | 0.010465 |
| ZFYVE26 28102 AT  | -2.55637 | 4.91E-09 | 2.09E-15 | 0.011522 | 0.010577 |
| FAM71D 28041 AT   | 2.553772 | 16.59092 | 1.921528 | 143.2499 | 0.010656 |
| DDX11 20980 ES    | -2.55353 | 0.000104 | 9.17E-08 | 0.118712 | 0.010664 |
| AVL9 79198 ES     | -2.55238 | 0.000103 | 8.95E-08 | 0.118756 | 0.010699 |
| CROT 80321 AP     | -2.5521  | 2.38E-05 | 6.69E-09 | 0.084566 | 0.010708 |
| NKX2-1 102506 ES  | 2.551043 | 393.3259 | 3.992144 | 38752.43 | 0.01074  |
| FAM13A 69911 ES   | -2.55068 | 0.001716 | 1.29E-05 | 0.22885  | 0.010751 |
| ABC8 82291 AD     | 2.550002 | 2255.491 | 5.968939 | 852285.4 | 0.010772 |
| PDCD6 71426 AD    | -2.54913 | 7.26E-05 | 4.76E-08 | 0.110485 | 0.010799 |
| CCNDBP1 30222 ES  | -2.5483  | 2.08E-12 | 2.16E-21 | 0.00201  | 0.010825 |
| PANK1 12494 AP    | 2.548152 | 53.78798 | 2.508954 | 1153.129 | 0.01083  |
| ZNF562 47394 ES   | -2.54711 | 0.000139 | 1.50E-07 | 0.12916  | 0.010862 |
| PRDM1 77110 AP    | 2.546224 | 43.36692 | 2.382047 | 789.5266 | 0.01089  |
| TST 62070 RI      | 2.545303 | 846665.5 | 23.07732 | 3.11E+10 | 0.010918 |
| SPATA13 25474 AP  | 2.545089 | 83.39521 | 2.764886 | 2515.388 | 0.010925 |
| CACNB3 21470 AP   | -2.54447 | 0.002338 | 2.20E-05 | 0.248638 | 0.010944 |
| ZMIZ2 79561 AA    | -2.54434 | 0.000163 | 1.96E-07 | 0.134855 | 0.010949 |
| CYB5RL 3129 AT    | 2.544322 | 58.47164 | 2.545757 | 1342.993 | 0.010949 |

|                   |          |          |          |          |          |
|-------------------|----------|----------|----------|----------|----------|
| CYB5RL 3128 AT    | -2.5443  | 0.017103 | 0.000745 | 0.392828 | 0.01095  |
| CASP8 56825 ES    | -2.54354 | 0.008045 | 0.000196 | 0.330716 | 0.010974 |
| GGT1 61437 AA     | -2.54351 | 0.027077 | 0.001678 | 0.43692  | 0.010975 |
| FAM49B 85136 AP   | 2.543102 | 138.4348 | 3.097359 | 6187.271 | 0.010987 |
| CMTM7 63816 ES    | -2.54296 | 1.81E-07 | 1.15E-12 | 0.028471 | 0.010992 |
| FADS1 16298 AP    | -2.54171 | 0.007911 | 0.000189 | 0.330328 | 0.011031 |
| PNPLA6 47115 ES   | 2.541288 | 227.8866 | 3.462044 | 15000.48 | 0.011044 |
| SSSCA1 16871 RI   | 2.541119 | 5.59E+09 | 169.5282 | 1.84E+17 | 0.01105  |
| IFNGR1 77930 AP   | -2.53975 | 1.24E-06 | 3.42E-11 | 0.044819 | 0.011093 |
| KRIT1 80426 ES    | -2.53975 | 7.54E-11 | 1.16E-18 | 0.004888 | 0.011093 |
| OSMR 71851 AD     | 2.538343 | 92.37298 | 2.804551 | 3042.472 | 0.011138 |
| GPR110 76434 AP   | -2.53793 | 7.03E-05 | 4.36E-08 | 0.113284 | 0.011151 |
| TASP1 58706 ES    | -2.53516 | 3.65E-14 | 1.49E-24 | 0.000894 | 0.01124  |
| SNX4 66556 ES     | -2.53479 | 1.52E-08 | 1.37E-14 | 0.01687  | 0.011251 |
| EVA1C 60349 ES    | 2.533503 | 1.26E+17 | 7440.098 | 2.15E+30 | 0.011293 |
| APLP2 19479 ES    | 2.532421 | 809.9121 | 4.544189 | 144350.9 | 0.011328 |
| SPATA6L 85760 AD  | 2.532383 | 1068.866 | 4.837901 | 236151.1 | 0.011329 |
| C18orf21 45196 RI | 2.532379 | 862.4421 | 4.608798 | 161388.4 | 0.011329 |
| BCAS3 42871 ES    | -2.53088 | 0.005885 | 0.00011  | 0.313976 | 0.011378 |
| RANBP1 61139 AA   | 2.529161 | 1.71E+08 | 71.23332 | 4.09E+14 | 0.011434 |
| ITGB1BP1 52625 ES | -2.52915 | 0.00047  | 1.24E-06 | 0.178301 | 0.011434 |
| AHNAK 16349 ES    | -2.5276  | 8.12E-05 | 5.47E-08 | 0.120612 | 0.011485 |
| CDK2AP1 25064 AP  | -2.52598 | 0.001078 | 5.37E-06 | 0.216314 | 0.011538 |
| PANK1 12493 AP    | -2.52491 | 0.019024 | 0.000878 | 0.412089 | 0.011573 |
| ST7L 4209 ES      | -2.52397 | 0.020948 | 0.001041 | 0.421543 | 0.011604 |
| SACM1L 64410 ES   | 2.522877 | 378540.1 | 17.56333 | 8.16E+09 | 0.01164  |
| CDK2AP1 25065 AP  | 2.522025 | 37772.81 | 10.4731  | 1.36E+08 | 0.011668 |
| C19orf66 47453 ES | 2.521158 | 17753867 | 41.08167 | 7.67E+12 | 0.011697 |
| C16orf93 94142 ES | 2.520322 | 150.0667 | 3.046953 | 7390.992 | 0.011725 |
| CD9 19819 AP      | 2.520279 | 1678.254 | 5.211457 | 540450.7 | 0.011726 |
| CD9 19817 AP      | -2.52028 | 0.000596 | 1.85E-06 | 0.191886 | 0.011726 |
| IMPDH1 81676 ES   | -2.51984 | 4.41E-10 | 2.33E-17 | 0.008343 | 0.011741 |
| NR4A2 55614 AP    | 2.518148 | 12.15601 | 1.739641 | 84.942   | 0.011797 |
| CREBZF 18139 RI   | 2.517195 | 307.3721 | 3.553809 | 26584.88 | 0.011829 |
| ASMTL 88387 AP    | -2.517   | 3.00E-10 | 1.15E-17 | 0.007809 | 0.011836 |
| FAM122C 90162 AT  | -2.51563 | 0.009086 | 0.000233 | 0.354022 | 0.011882 |
| FAM122C 90163 AT  | 2.515608 | 110.0589 | 2.824564 | 4288.435 | 0.011883 |
| INTU 70537 AA     | -2.51502 | 0.038568 | 0.003051 | 0.487513 | 0.011903 |
| EFEMP2 16933 ES   | 2.513239 | 5.19E+32 | 15922689 | 1.69E+58 | 0.011963 |
| DCTD 96838 ES     | 2.512588 | 311.2793 | 3.53467  | 27412.68 | 0.011985 |
| MS4A6A 16065 AD   | 2.512268 | 3.46E+14 | 1571.85  | 7.63E+25 | 0.011996 |
| MAP3K2 55209 AP   | -2.50751 | 0.001787 | 1.27E-05 | 0.251157 | 0.012159 |
| ZNF720 36288 AA   | 2.506877 | 197.2611 | 3.167362 | 12285.29 | 0.01218  |
| COL1A1 196922 ES  | -2.50591 | 9.88E-18 | 4.95E-31 | 0.000197 | 0.012214 |
| PUS1 25229 AD     | -2.5053  | 0.003451 | 4.09E-05 | 0.291125 | 0.012235 |
| ETFA 31944 ES     | -2.50461 | 0.047791 | 0.004425 | 0.516197 | 0.012259 |
| ZMIZ1 12300 ES    | 2.503918 | 3485.084 | 5.881851 | 2064964  | 0.012283 |
| NUPL2 78961 AT    | -2.50326 | 2.57E-06 | 1.08E-10 | 0.061198 | 0.012305 |
| NUPL2 78960 AT    | 2.503254 | 389167.6 | 16.33983 | 9.27E+09 | 0.012306 |
| CTNND1 15932 RI   | -2.50303 | 2.21E-10 | 6.06E-18 | 0.008034 | 0.012314 |
| TG 319468 ES      | 2.502966 | 73.28273 | 2.538632 | 2115.453 | 0.012316 |
| GNAL 44641 AP     | 2.502194 | 7.079003 | 1.528236 | 32.79092 | 0.012343 |
| AGAP3 82352 AT    | 2.50149  | 3818025  | 26.59773 | 5.48E+11 | 0.012367 |
| AGAP3 82351 AT    | -2.50148 | 2.62E-07 | 1.82E-12 | 0.0376   | 0.012368 |
| NRG1 83314 AT     | -2.50095 | 1.06E-07 | 3.60E-13 | 0.030964 | 0.012386 |
| EIF4G1 67875 AP   | 2.500681 | 471.5383 | 3.785204 | 58741.44 | 0.012395 |
| METTL21A 57189 AT | -2.50034 | 0.001357 | 7.67E-06 | 0.240049 | 0.012407 |
| HAS3 37253 AT     | 2.500278 | 44916.69 | 10.12495 | 1.99E+08 | 0.01241  |

|                    |          |          |          |          |          |
|--------------------|----------|----------|----------|----------|----------|
| HAS3 37254 AT      | -2.50027 | 2.23E-05 | 5.02E-09 | 0.098769 | 0.01241  |
| CCAR2 83036 AP     | -2.49997 | 0.000127 | 1.12E-07 | 0.143973 | 0.01242  |
| CCAR2 83035 AP     | 2.499967 | 7884.199 | 6.945693 | 8949515  | 0.01242  |
| SFTA3 121939 ES    | 2.498913 | 219.389  | 3.198434 | 15048.46 | 0.012458 |
| COPA 8458 AA       | 2.498771 | 2116704  | 23.12031 | 1.94E+11 | 0.012462 |
| USP3 31052 ES      | -2.49853 | 0.005559 | 9.46E-05 | 0.326531 | 0.012471 |
| TNFRSF10C 83066 ES | -2.49816 | 2.37E-16 | 1.30E-28 | 0.00043  | 0.012484 |
| ZSCAN9 75724 AD    | 2.497793 | 214.2859 | 3.176242 | 14456.85 | 0.012497 |
| PTPRE 13458 AP     | -2.49759 | 0.090663 | 0.013781 | 0.596456 | 0.012504 |
| ZDHH4 78748 AD     | 2.496758 | 16.99973 | 1.838825 | 157.1606 | 0.012533 |
| AASDHPPT 18561 ES  | -2.49558 | 3.28E-15 | 1.38E-26 | 0.000779 | 0.012575 |
| ASPSCR1 44258 ES   | 2.494044 | 3.92E+08 | 69.20369 | 2.22E+15 | 0.01263  |
| PSEN2 10024 AP     | -2.49403 | 0.056673 | 0.005939 | 0.540818 | 0.01263  |
| ARHGEF26 67328 AP  | 2.492363 | 26.20007 | 2.008938 | 341.695  | 0.01269  |
| NDUFAF6 84599 AD   | 2.492047 | 205.4071 | 3.117253 | 13535.02 | 0.012701 |
| PSEN2 10023 AP     | 2.491749 | 17.38355 | 1.839367 | 164.289  | 0.012712 |
| PRPSAP2 39671 ES   | -2.49113 | 2.43E-05 | 5.69E-09 | 0.103784 | 0.012734 |
| DMPK 50526 AA      | -2.48955 | 0.006257 | 0.000115 | 0.339816 | 0.012791 |
| EVL 29241 AP       | -2.48711 | 0.085118 | 0.012213 | 0.59322  | 0.012878 |
| ACAD8 19554 ES     | -2.48635 | 1.14E-05 | 1.45E-09 | 0.089855 | 0.012906 |
| PADI4 852 AT       | -2.48454 | 0.020425 | 0.000949 | 0.439755 | 0.012972 |
| SULT1A1 235342 ES  | 2.483189 | 83.7666  | 2.542169 | 2760.179 | 0.013021 |
| PADI4 851 AT       | 2.48247  | 48.88132 | 2.267398 | 1053.8   | 0.013048 |
| EPS8L1 52013 RI    | 2.480871 | 33672.15 | 8.924596 | 1.27E+08 | 0.013106 |
| RPS6 214602 AA     | 2.480844 | 96251.37 | 11.12552 | 8.33E+08 | 0.013107 |
| ZMYND8 59712 ES    | -2.48028 | 0.000904 | 3.55E-06 | 0.229846 | 0.013128 |
| TNRC6B 62335 AP    | 2.479694 | 54.83909 | 2.314747 | 1299.203 | 0.01315  |
| TMEFF1 87084 AP    | 2.478424 | 347.0312 | 3.399523 | 35425.74 | 0.013196 |
| PTGR2 28317 AD     | 2.477762 | 16.28173 | 1.791508 | 147.9729 | 0.013221 |
| PRR13 22026 AP     | -2.47301 | 5.00E-10 | 2.13E-17 | 0.011762 | 0.013398 |
| RGS11 32860 AT     | 2.472968 | 368.4161 | 3.40701  | 39838.58 | 0.0134   |
| RHBDF1 32789 AT    | -2.46981 | 9.82E-11 | 1.12E-18 | 0.008591 | 0.013519 |
| CPNE1 59205 AD     | 2.468657 | 1613.578 | 4.581411 | 568304   | 0.013562 |
| DDT 61355 AP       | 2.468572 | 480.6575 | 3.569011 | 64732.69 | 0.013565 |
| BAIAP2 44097 RI    | 2.468418 | 26.99405 | 1.971597 | 369.588  | 0.013571 |
| LGALS3 27617 AT    | -2.4678  | 0.00041  | 8.36E-07 | 0.200877 | 0.013594 |
| PCDHA2 73770 AT    | -2.46584 | 0.03883  | 0.002936 | 0.513524 | 0.013669 |
| NRSN2 58447 ES     | 2.462648 | 150.741  | 2.783735 | 8162.723 | 0.013792 |
| ARMCX3 89663 AA    | -2.4626  | 0.005033 | 7.46E-05 | 0.339561 | 0.013793 |
| CKLF 36732 ES      | -2.46246 | 3.63E-10 | 1.11E-17 | 0.01185  | 0.013799 |
| RARRES2 82226 RI   | 2.461791 | 12.74963 | 1.680164 | 96.74841 | 0.013825 |
| APH1A 7444 RI      | 2.460392 | 35127.82 | 8.40537  | 1.47E+08 | 0.013879 |
| TMEM151B 97224 AT  | 2.458844 | 13.25329 | 1.689315 | 103.9769 | 0.013939 |
| TMEM79 8218 AP     | 2.458668 | 6.202981 | 1.447995 | 26.57259 | 0.013945 |
| MVP 233980 ES      | -2.45802 | 0.003207 | 3.29E-05 | 0.31238  | 0.013971 |
| RPL7 84149 AD      | -2.45781 | 3.18E-15 | 8.75E-27 | 0.001157 | 0.013979 |
| TJP2 86538 ES      | -2.45778 | 0.02856  | 0.001676 | 0.486654 | 0.01398  |
| TMEM232 72938 ES   | 2.457415 | 22.46893 | 1.877582 | 268.8845 | 0.013994 |
| PCK2 26813 AP      | -2.45686 | 2.85E-13 | 2.79E-23 | 0.002902 | 0.014016 |
| FAM76A 1342 ES     | -2.45354 | 0.009071 | 0.000212 | 0.388277 | 0.014146 |
| COL16A1 1493 ES    | 2.4529   | 43.48202 | 2.134202 | 885.8985 | 0.014171 |
| SPARCL1 69872 ES   | 2.452866 | 30365590 | 31.88448 | 2.89E+13 | 0.014172 |
| GAS7 39265 ES      | -2.45284 | 5.03E-06 | 2.93E-10 | 0.086157 | 0.014173 |
| PAM 72899 ES       | -2.45282 | 8.44E-06 | 7.45E-10 | 0.095619 | 0.014174 |
| SIPA1L1 28199 ES   | 2.451278 | 536.546  | 3.524524 | 81679.59 | 0.014235 |
| TMEM151B 97223 AT  | -2.45044 | 0.073913 | 0.009202 | 0.593697 | 0.014268 |
| RAD51 30018 ES     | -2.45006 | 0.00179  | 1.14E-05 | 0.282134 | 0.014283 |
| FNTA 83748 AP      | -2.44906 | 0.002294 | 1.77E-05 | 0.297089 | 0.014323 |

|                   |          |          |          |          |          |
|-------------------|----------|----------|----------|----------|----------|
| FNTA 83749 AP     | 2.449065 | 435.9147 | 3.36599  | 56453.4  | 0.014323 |
| RCAN2 76415 AP    | 2.448408 | 7.953279 | 1.512356 | 41.82525 | 0.014349 |
| ZNF562 47387 ES   | -2.4484  | 0.000289 | 4.26E-07 | 0.196841 | 0.014349 |
| ZNF720 94157 ES   | -2.44838 | 0.003027 | 2.91E-05 | 0.314411 | 0.01435  |
| NT5C3A 79208 AP   | 2.448042 | 860.5799 | 3.847011 | 192512.5 | 0.014363 |
| TMEM108 66827 AT  | -2.44597 | 0.000673 | 1.94E-06 | 0.234315 | 0.014446 |
| TMEM108 66828 AT  | 2.445966 | 1484.807 | 4.26772  | 516587.7 | 0.014446 |
| POM121C 80119 AP  | -2.4446  | 0.001128 | 4.89E-06 | 0.260403 | 0.014501 |
| POM121C 80118 AP  | 2.444327 | 885.6208 | 3.837257 | 204397.1 | 0.014512 |
| RAMP2 41122 ES    | -2.44419 | 8.01E-05 | 4.16E-08 | 0.154341 | 0.014518 |
| UEVLD 14672 ES    | -2.44366 | 5.23E-06 | 3.04E-10 | 0.090075 | 0.014539 |
| ARRB2 38574 ES    | -2.442   | 1.79E-06 | 4.37E-11 | 0.073376 | 0.014606 |
| PUM2 52777 ES     | -2.44153 | 0.000202 | 2.19E-07 | 0.186833 | 0.014625 |
| PPP6R2 62824 AA   | 2.440703 | 2.76E+08 | 45.98394 | 1.66E+15 | 0.014659 |
| SCML4 77135 AT    | 2.439531 | 38.25856 | 2.047084 | 715.0256 | 0.014706 |
| TMEFF1 87085 AP   | -2.43939 | 0.003049 | 2.90E-05 | 0.320289 | 0.014712 |
| NT5C3A 79207 AP   | -2.43903 | 0.001172 | 5.17E-06 | 0.265651 | 0.014727 |
| C1orf63 1146 AA   | -2.43858 | 0.073583 | 0.009036 | 0.599215 | 0.014745 |
| CCPG1 30722 AP    | -2.43857 | 0.005887 | 9.49E-05 | 0.365014 | 0.014746 |
| PTBP1 46321 ES    | -2.43789 | 1.81E-08 | 1.08E-14 | 0.030363 | 0.014773 |
| TCF3 46538 AA     | -2.4375  | 0.002423 | 1.91E-05 | 0.307303 | 0.014789 |
| ALDH1A3 32741 AT  | -2.43712 | 8.70E-20 | 4.08E-35 | 0.000185 | 0.014805 |
| CCDC148 55661 AT  | 2.43579  | 24.01217 | 1.860647 | 309.8838 | 0.014859 |
| TMEM79 8217 AP    | -2.43406 | 0.163525 | 0.038049 | 0.702789 | 0.014931 |
| IAH1 52628 AP     | 2.432705 | 2.46E+09 | 66.84539 | 9.09E+16 | 0.014986 |
| IAH1 52629 AP     | -2.43245 | 4.07E-10 | 1.11E-17 | 0.014999 | 0.014997 |
| WBP2NL 62480 AT   | -2.43198 | 0.05902  | 0.006033 | 0.577387 | 0.015017 |
| SERF1A 72415 AT   | -2.43139 | 8.18E-05 | 4.15E-08 | 0.161254 | 0.015041 |
| PTBP2 3832 ES     | 2.430373 | 13.94393 | 1.665331 | 116.7535 | 0.015083 |
| CXorf40A 90314 AD | -2.42997 | 0.007515 | 0.000145 | 0.3883   | 0.0151   |
| RGN 88903 ES      | 2.429054 | 787.6727 | 3.625194 | 171143.5 | 0.015138 |
| METTL21A 57190 AT | -2.42869 | 8.94E-12 | 1.08E-20 | 0.007373 | 0.015153 |
| SLC36A1 74171 AT  | -2.42855 | 0.000119 | 8.14E-08 | 0.174985 | 0.015159 |
| ABCC9 20715 AT    | -2.42807 | 3.86E-11 | 1.51E-19 | 0.009825 | 0.015179 |
| SMAGP 21836 RI    | -2.42793 | 0.020035 | 0.000853 | 0.470635 | 0.015185 |
| CCDC130 47933 AP  | -2.42735 | 0.001373 | 6.71E-06 | 0.281114 | 0.01521  |
| CCDC130 47932 AP  | 2.42735  | 728.1226 | 3.557272 | 149036.3 | 0.01521  |
| ZNF415 51676 ES   | 2.426816 | 16.54497 | 1.715684 | 159.5492 | 0.015232 |
| SUMF2 79803 ES    | -2.42627 | 0.002484 | 1.95E-05 | 0.315761 | 0.015255 |
| UBALD1 33778 AD   | -2.42603 | 2.83E-10 | 5.47E-18 | 0.014646 | 0.015265 |
| RBM6 64939 ES     | 2.425949 | 92.39618 | 2.385446 | 3578.808 | 0.015268 |
| KCNJ11 14528 AP   | -2.42577 | 8.61E-08 | 1.69E-13 | 0.043994 | 0.015276 |
| MUTYH 2650 ES     | -2.42508 | 0.006334 | 0.000106 | 0.378768 | 0.015305 |
| CAV1 81536 AD     | 2.424137 | 2499.972 | 4.473376 | 1397124  | 0.015345 |
| CNRIP1 53837 AT   | -2.42402 | 1.28E-08 | 5.30E-15 | 0.030821 | 0.01535  |
| SPTAN1 87770 ES   | -2.42347 | 9.44E-09 | 3.06E-15 | 0.029188 | 0.015373 |
| ARHGEF26 67332 AA | -2.42329 | 0.012668 | 0.00037  | 0.433753 | 0.015381 |
| NDRG2 26503 RI    | -2.42161 | 0.0703   | 0.008198 | 0.60282  | 0.015452 |
| CPNE1 59196 ES    | -2.42154 | 1.07E-06 | 1.57E-11 | 0.072764 | 0.015455 |
| NEDD1 23841 ES    | -2.42133 | 0.010333 | 0.000255 | 0.418432 | 0.015464 |
| AXL 50027 ES      | 2.42125  | 599.8727 | 3.3827   | 106378.7 | 0.015467 |
| PIGV 1299 AP      | -2.41891 | 0.01337  | 0.000405 | 0.441032 | 0.015567 |
| CCL2 40220 RI     | 2.418488 | 11800.93 | 5.915602 | 23541471 | 0.015585 |
| CYP4B1 2838 AA    | 2.418322 | 14335.36 | 6.134614 | 33498839 | 0.015592 |
| ETFA 31939 ES     | -2.41796 | 0.057613 | 0.005699 | 0.582405 | 0.015608 |
| SCRN2 42120 RI    | 2.416612 | 245.0231 | 2.827933 | 21229.75 | 0.015666 |
| CDK2AP2 17244 AD  | 2.416547 | 3784031  | 17.49202 | 8.19E+11 | 0.015669 |
| ATG16L2 17663 ES  | -2.41587 | 0.000909 | 3.10E-06 | 0.266722 | 0.015698 |

|                   |          |          |          |          |          |
|-------------------|----------|----------|----------|----------|----------|
| PRDM1 77111 AP    | -2.41443 | 0.026081 | 0.001351 | 0.503388 | 0.01576  |
| PIGV 1300 AP      | 2.413776 | 73.98941 | 2.246057 | 2437.353 | 0.015788 |
| BBIP1 13092 ES    | -2.41364 | 0.001045 | 3.97E-06 | 0.27525  | 0.015794 |
| WDFY3 69811 ES    | -2.41248 | 0.013505 | 0.000409 | 0.446    | 0.015844 |
| ZNF227 50300 ES   | -2.41235 | 0.012133 | 0.000337 | 0.43721  | 0.01585  |
| PLD4 29579 RI     | 2.411802 | 43.44098 | 2.026989 | 930.996  | 0.015874 |
| BCAT2 50814 ES    | 2.411178 | 21.38491 | 1.773817 | 257.8138 | 0.015901 |
| WDR20 29338 AT    | 2.410738 | 99012719 | 31.2666  | 3.14E+14 | 0.01592  |
| LRRC23 20002 ES   | 2.409977 | 626.562  | 3.328698 | 117938   | 0.015954 |
| SYTL3 78284 ES    | -2.40806 | 3.09E-15 | 4.80E-27 | 0.001996 | 0.016038 |
| GRAP 39686 AP     | -2.40724 | 2.53E-05 | 4.59E-09 | 0.139961 | 0.016074 |
| VAV3 3931 AT      | -2.40707 | 1.09E-08 | 3.60E-15 | 0.033207 | 0.016081 |
| GPATCH2L 28540 AT | 2.406491 | 3244.698 | 4.482316 | 2348801  | 0.016107 |
| GPR162 19974 ES   | -2.40545 | 4.48E-05 | 1.28E-08 | 0.156511 | 0.016153 |
| C2orf68 54308 AT  | -2.40509 | 6.55E-06 | 3.91E-10 | 0.10981  | 0.016169 |
| C2orf68 54309 AT  | 2.405079 | 152610   | 9.106262 | 2.56E+09 | 0.016169 |
| FDPS 8074 AA      | -2.40139 | 5.75E-05 | 1.99E-08 | 0.166163 | 0.016333 |
| ARID4A 27700 ES   | -2.4008  | 6.31E-08 | 8.37E-14 | 0.04764  | 0.016359 |
| MTUS1 82818 AP    | -2.4008  | 0.043869 | 0.003417 | 0.563212 | 0.016359 |
| HSFX2 90316 ES    | -2.40019 | 0.041466 | 0.003083 | 0.557783 | 0.016386 |
| YAF2 21105 AT     | -2.39885 | 2.22E-11 | 4.39E-20 | 0.011242 | 0.016447 |
| YAF2 21104 AT     | 2.398851 | 4.5E+10  | 88.94964 | 2.28E+19 | 0.016447 |
| MSMO1 71042 ES    | -2.39833 | 0.002085 | 1.34E-05 | 0.323581 | 0.01647  |
| TSTD1 8525 RI     | 2.396377 | 26623693 | 22.50307 | 3.15E+13 | 0.016558 |
| NARG2 30965 AA    | -2.39636 | 0.001661 | 8.85E-06 | 0.311743 | 0.016559 |
| SLMAP 65408 ES    | 2.39605  | 199.5502 | 2.621887 | 15187.63 | 0.016573 |
| CCDC120 89058 AP  | -2.39575 | 0.020268 | 0.000835 | 0.492047 | 0.016586 |
| AURKAIP1 150 RI   | 2.395599 | 65383103 | 26.37717 | 1.62E+14 | 0.016593 |
| MKL2 34068 AP     | 2.394986 | 30.93521 | 1.865194 | 513.0766 | 0.016621 |
| TMEM44 68154 AP   | 2.394829 | 43.35805 | 1.982748 | 948.1391 | 0.016628 |
| HCFC1R1 33353 AA  | -2.39439 | 0.00405  | 4.46E-05 | 0.368049 | 0.016648 |
| RNF167 38613 AD   | -2.39324 | 4.29E-14 | 4.85E-25 | 0.003801 | 0.0167   |
| SETD5 63091 ES    | -2.39296 | 0.000902 | 2.89E-06 | 0.281205 | 0.016713 |
| RCAN2 76416 AP    | -2.39052 | 0.097899 | 0.014566 | 0.658006 | 0.016825 |
| CLDND1 65747 AP   | 2.389879 | 451.6467 | 3.003114 | 67924.4  | 0.016854 |
| MFSD9 54807 ES    | -2.38917 | 0.003349 | 3.12E-05 | 0.359221 | 0.016886 |
| PTPRE 13459 AP    | 2.388754 | 21.83657 | 1.739356 | 274.145  | 0.016906 |
| ANKRD26 11054 AP  | 2.388259 | 66.70364 | 2.123887 | 2094.921 | 0.016928 |
| ZFP64 59809 AP    | -2.3876  | 0.047654 | 0.003917 | 0.579746 | 0.016959 |
| MRPL27 42371 AP   | -2.38752 | 1.80E-09 | 1.19E-16 | 0.027165 | 0.016962 |
| MPPE1 44651 ES    | -2.38668 | 0.002783 | 2.22E-05 | 0.349221 | 0.017001 |
| SFTA3 27261 ES    | 2.386526 | 16741.18 | 5.687877 | 49274494 | 0.017008 |
| GPR89A 7317 ES    | 2.384823 | 1650.859 | 3.743164 | 728083.7 | 0.017087 |
| ZSCAN18 52401 AT  | 2.384498 | 6.64E+25 | 39565.76 | 1.11E+47 | 0.017102 |
| GOLGA7 83514 AD   | -2.38434 | 4.05E-05 | 9.94E-09 | 0.165291 | 0.01711  |
| THOC7 65512 ES    | 2.383832 | 1.53E+15 | 501.2026 | 4.67E+27 | 0.017133 |
| MBOAT7 51802 AT   | 2.383476 | 1.1E+18  | 1605.729 | 7.53E+32 | 0.01715  |
| RFX5 7603 AP      | 2.382379 | 122.9825 | 2.347177 | 6443.786 | 0.017201 |
| SERPINA1 29123 AA | -2.38234 | 0.075731 | 0.009062 | 0.632853 | 0.017203 |
| ZNF655 80688 ES   | 2.380627 | 13.34277 | 1.580644 | 112.631  | 0.017283 |
| PEMT 39496 AD     | 2.379049 | 3.64E+16 | 826.5552 | 1.60E+30 | 0.017357 |
| FASTK 82340 ES    | 2.378893 | 152859.1 | 8.184035 | 2.86E+09 | 0.017365 |
| SFTA3 121942 ES   | 2.376692 | 199.656  | 2.531225 | 15748.31 | 0.017469 |
| CREM 11230 AP     | 2.375653 | 63.12678 | 2.065376 | 1929.426 | 0.017518 |
| ZNF266 47339 AD   | -2.37428 | 0.040447 | 0.002863 | 0.571343 | 0.017583 |
| ZDHHC4 78753 AD   | 2.373097 | 55.23496 | 2.010493 | 1517.489 | 0.01764  |
| CLUAP1 33575 AP   | -2.37243 | 0.000816 | 2.29E-06 | 0.290471 | 0.017671 |
| KIAA2013 694 AT   | -2.37197 | 3.52E-22 | 6.60E-40 | 0.000188 | 0.017693 |

|                   |          |          |          |          |          |
|-------------------|----------|----------|----------|----------|----------|
| ZSCAN31 75728 AP  | 2.371506 | 7.667031 | 1.424016 | 41.28    | 0.017716 |
| CCDC53 24023 ES   | 2.370419 | 46305.15 | 6.425217 | 3.34E+08 | 0.017768 |
| TPM2 98133 ES     | -2.36915 | 0.075933 | 0.009    | 0.640669 | 0.017829 |
| C11orf49 15609 RI | 2.368733 | 579.7272 | 2.998096 | 112099   | 0.017849 |
| ARL13B 65700 ES   | -2.36803 | 0.028008 | 0.001453 | 0.540047 | 0.017883 |
| SLC25A19 43434 ES | 2.367603 | 32.47817 | 1.820774 | 579.3313 | 0.017904 |
| LONRF3 89946 AP   | -2.36753 | 5.15E-12 | 2.33E-21 | 0.011398 | 0.017908 |
| NDUFAF6 84598 ES  | 2.36707  | 59.86903 | 2.021418 | 1773.162 | 0.01793  |
| IL1RN 55030 AP    | 2.366448 | 14.00873 | 1.57368  | 124.7041 | 0.01796  |
| PAK6 29958 AP     | 2.366271 | 18.45497 | 1.649687 | 206.4548 | 0.017968 |
| RASA4 81121 AP    | 2.366236 | 26.61737 | 1.756687 | 403.3071 | 0.01797  |
| RASA4 81120 AP    | -2.36621 | 0.037571 | 0.00248  | 0.569275 | 0.017971 |
| DENND1B 9304 AT   | -2.36611 | 0.000147 | 9.81E-08 | 0.219796 | 0.017976 |
| DENND1B 9305 AT   | 2.366107 | 6810.995 | 4.549584 | 10196460 | 0.017976 |
| LRRC6 85182 ES    | 2.364347 | 442.0797 | 2.834457 | 68949.51 | 0.018062 |
| NR4A2 55613 AP    | -2.36409 | 0.098797 | 0.014499 | 0.67322  | 0.018074 |
| CCT7 53965 ES     | -2.3638  | 0.057334 | 0.005357 | 0.613603 | 0.018089 |
| SSBP1 82055 AD    | 2.362095 | 1185003  | 10.81462 | 1.3E+11  | 0.018172 |
| CCDC124 48386 AP  | 2.362072 | 1215.512 | 3.350692 | 440944.8 | 0.018173 |
| CCDC124 48385 AP  | -2.36205 | 0.000823 | 2.27E-06 | 0.298466 | 0.018174 |
| TCOF1 74070 ES    | 2.361936 | 511756.7 | 9.367254 | 2.8E+10  | 0.01818  |
| HNRNPUL1 50036 AA | -2.36121 | 3.64E-11 | 7.86E-20 | 0.016827 | 0.018215 |
| ZNF517 85650 AT   | 2.3611   | 46621745 | 20.08369 | 1.08E+14 | 0.018221 |
| KBTBD3 18557 AT   | 2.360076 | 2741.701 | 3.827013 | 1964175  | 0.018271 |
| DMKN 49178 ES     | -2.35994 | 2.18E-05 | 2.92E-09 | 0.162095 | 0.018278 |
| ATP11A 26310 ES   | 2.359618 | 77.2233  | 2.088009 | 2856.04  | 0.018294 |
| KBTBD3 18556 AT   | -2.35962 | 0.000365 | 5.09E-07 | 0.261679 | 0.018294 |
| TRPT1 16581 ES    | -2.35809 | 0.016299 | 0.000532 | 0.499058 | 0.018369 |
| ITFG2 19715 AT    | -2.35731 | 1.76E-10 | 1.36E-18 | 0.022679 | 0.018408 |
| MROH7 3156 AP     | 2.356231 | 87.37602 | 2.120802 | 3599.85  | 0.018461 |
| TRMT44 68771 AT   | -2.35603 | 4.72E-11 | 1.21E-19 | 0.018372 | 0.018471 |
| CENPK 72212 AT    | -2.35574 | 0.021384 | 0.000872 | 0.524141 | 0.018486 |
| CENPK 72213 AT    | 2.355735 | 46.76281 | 1.90787  | 1146.179 | 0.018486 |
| KCNH6 42934 AT    | 2.355552 | 129.5581 | 2.263414 | 7415.922 | 0.018495 |
| ZSCAN18 52406 AD  | 2.355252 | 132.3216 | 2.270278 | 7712.279 | 0.01851  |
| ZNF263 33511 ES   | -2.35496 | 0.050833 | 0.004259 | 0.606713 | 0.018525 |
| IL15RA 10681 ES   | -2.35292 | 0.007714 | 0.000134 | 0.443774 | 0.018627 |
| HSP90AA1 29333 AT | -2.35109 | 1.13E-14 | 2.67E-26 | 0.004784 | 0.018718 |
| TMEM44 68155 AP   | -2.35084 | 0.024534 | 0.001115 | 0.539843 | 0.018731 |
| ZNF331 51722 AP   | -2.35065 | 0.002496 | 1.69E-05 | 0.369333 | 0.01874  |
| FBXW7 70846 AP    | 2.350615 | 24.0192  | 1.696041 | 340.158  | 0.018742 |
| SFTPBJ 54324 AA   | -2.35034 | 0.001253 | 4.77E-06 | 0.329618 | 0.018756 |
| ATG13 15597 AA    | -2.34999 | 0.008677 | 0.000166 | 0.454808 | 0.018774 |
| TTLL3 63225 ES    | 2.348154 | 198.0206 | 2.397097 | 16358.18 | 0.018867 |
| XRCC6 62440 AP    | -2.34793 | 0.001539 | 6.90E-06 | 0.342935 | 0.018878 |
| SETD4 60518 ES    | 2.347307 | 40.81204 | 1.844189 | 903.1732 | 0.01891  |
| TMC6 43757 AT     | 2.34724  | 56.78041 | 1.947282 | 1655.649 | 0.018913 |
| TMC6 43758 AT     | -2.34723 | 0.017612 | 0.000604 | 0.513543 | 0.018913 |
| GTF2H2C 72395 ES  | -2.34713 | 2.44E-07 | 7.33E-13 | 0.081134 | 0.018919 |
| VPS53 38220 AD    | -2.34688 | 5.80E-22 | 1.07E-39 | 0.000315 | 0.018931 |
| TANGO2 61114 AP   | -2.34662 | 0.000924 | 2.70E-06 | 0.31622  | 0.018944 |
| HIATL1 86935 ES   | -2.34615 | 2.10E-06 | 3.81E-11 | 0.116301 | 0.018969 |
| CTNND1 15935 ES   | 2.346006 | 89.87487 | 2.096414 | 3853.004 | 0.018976 |
| KBTBD3 18559 ES   | -2.34481 | 0.000171 | 1.21E-07 | 0.240808 | 0.019037 |
| EPOR 47690 AA     | 2.344523 | 3155.803 | 3.749207 | 2656319  | 0.019051 |
| SELP 8933 ES      | -2.3441  | 0.000205 | 1.70E-07 | 0.248723 | 0.019073 |
| RARA 40856 AP     | -2.34343 | 0.000133 | 7.58E-08 | 0.232005 | 0.019107 |
| PDGFD 18490 AA    | 2.343416 | 1778.755 | 3.402635 | 929858.3 | 0.019108 |

|                    |          |          |          |          |          |
|--------------------|----------|----------|----------|----------|----------|
| PKIG 59473 AP      | -2.34296 | 5.62E-06 | 2.28E-10 | 0.138585 | 0.019132 |
| PAM 72898 ES       | -2.34153 | 4.57E-05 | 1.06E-08 | 0.196231 | 0.019205 |
| SIRT3 13596 AD     | 2.339184 | 30863.13 | 5.343331 | 1.78E+08 | 0.019326 |
| PIGT 59561 ES      | -2.33771 | 0.003766 | 3.50E-05 | 0.40579  | 0.019402 |
| SERPINA1 29104 RI  | -2.33691 | 0.002316 | 1.43E-05 | 0.375769 | 0.019444 |
| STAU2 84165 ES     | -2.33681 | 1.06E-07 | 1.50E-13 | 0.075046 | 0.019449 |
| EEF1E1 75283 AT    | 2.336435 | 88000359 | 19.05893 | 4.06E+14 | 0.019469 |
| SIDT2 18891 ES     | 2.335802 | 3157.558 | 3.656428 | 2726752  | 0.019502 |
| SRP68 43546 AP     | -2.3354  | 0.034548 | 0.00205  | 0.582158 | 0.019523 |
| SRP68 43547 AP     | 2.335236 | 28.94009 | 1.717366 | 487.6822 | 0.019531 |
| ST7L 4216 AA       | -2.33466 | 5.80E-07 | 3.38E-12 | 0.099799 | 0.019561 |
| MRPL27 42369 AP    | 2.33391  | 3.5E+08  | 23.3906  | 5.25E+15 | 0.0196   |
| RANBP17 74506 ES   | 2.333897 | 9.573886 | 1.436112 | 63.82461 | 0.019601 |
| UBE2V1 59758 ES    | -2.33379 | 7.84E-07 | 5.84E-12 | 0.105191 | 0.019607 |
| PXN 24748 ES       | 2.333752 | 24.84779 | 1.672931 | 369.0603 | 0.019609 |
| SMARCB1 61329 AD   | -2.33293 | 4.50E-06 | 1.45E-10 | 0.139712 | 0.019652 |
| FRMD3 86681 AP     | -2.33147 | 0.001676 | 7.77E-06 | 0.361154 | 0.019729 |
| MRI1 95017 ES      | 2.330926 | 168.1192 | 2.260489 | 12503.52 | 0.019757 |
| CD22 49112 ES      | -2.33076 | 1.79E-05 | 1.82E-09 | 0.175672 | 0.019766 |
| WDR45 89077 AA     | 2.329597 | 3300149  | 10.82143 | 1.01E+12 | 0.019827 |
| SESN1 77156 AP     | -2.32821 | 0.012523 | 0.000314 | 0.500172 | 0.019901 |
| ANKRD16 10668 ES   | 2.327574 | 79798579 | 17.70175 | 3.6E+14  | 0.019935 |
| STX16 59983 ES     | -2.32696 | 0.007469 | 0.000121 | 0.461935 | 0.019968 |
| U2AF1L4 49269 AA   | -2.32685 | 4.72E-08 | 3.19E-14 | 0.069973 | 0.019973 |
| NCBP2 68272 AD     | 2.326848 | 24960.04 | 4.935507 | 1.26E+08 | 0.019973 |
| MFSD11 43691 AD    | -2.32672 | 0.10871  | 0.016767 | 0.704839 | 0.01998  |
| VCL 12254 ES       | 2.325098 | 44.61872 | 1.815685 | 1096.462 | 0.020067 |
| COPS3 39475 AA     | 2.324464 | 12290.24 | 4.378101 | 34501279 | 0.020101 |
| PBX1 8787 AT       | -2.32437 | 4.17E-16 | 4.47E-29 | 0.003879 | 0.020106 |
| MKNK1 2815 AD      | -2.32427 | 0.013546 | 0.00036  | 0.509546 | 0.020111 |
| TNFRSF12A 33347 ES | -2.32412 | 0.019716 | 0.000719 | 0.540535 | 0.020119 |
| KSR1 39851 AA      | 2.323508 | 676.3355 | 2.77215  | 165009   | 0.020152 |
| VAMP8 54289 AP     | -2.32094 | 1.66E-20 | 3.30E-37 | 0.000839 | 0.02029  |
| NVL 9944 ES        | 2.320885 | 172.0575 | 2.226743 | 13294.66 | 0.020293 |
| ACOT7 391 AP       | -2.32074 | 0.034184 | 0.001975 | 0.591656 | 0.020301 |
| PGS1 43874 AA      | -2.32036 | 1.34E-13 | 1.80E-24 | 0.010017 | 0.020321 |
| POLR2D 55247 AP    | -2.31966 | 0.001311 | 4.81E-06 | 0.35729  | 0.020359 |
| NSUN5 270161 ES    | 2.319482 | 1.02E+20 | 1262.659 | 8.23E+36 | 0.020369 |
| ARMCX4 89650 RI    | 2.319324 | 8.737355 | 1.399133 | 54.56334 | 0.020377 |
| SLC25A32 84813 ES  | -2.3188  | 0.000125 | 6.26E-08 | 0.248833 | 0.020406 |
| KANK2 47639 ES     | 2.318714 | 187.4044 | 2.247208 | 15628.46 | 0.020411 |
| HDAC10 62801 ES    | -2.31803 | 2.44E-08 | 8.95E-15 | 0.066704 | 0.020448 |
| IQCK 34333 AT      | 2.317684 | 1.83E+09 | 26.89179 | 1.25E+17 | 0.020466 |
| SERF1B 72403 AT    | -2.31763 | 5.00E-05 | 1.15E-08 | 0.216898 | 0.020469 |
| AKIP1 14279 ES     | 2.31737  | 1008.013 | 2.905506 | 349711.7 | 0.020484 |
| TOLLIP 13825 AP    | -2.31661 | 7.20E-05 | 2.25E-08 | 0.230251 | 0.020525 |
| RGS11 32858 AT     | -2.31612 | 0.00648  | 9.11E-05 | 0.460769 | 0.020552 |
| BBS5 55864 AT      | -2.31593 | 1.28E-05 | 9.20E-10 | 0.176909 | 0.020562 |
| AKAP13 32349 AT    | -2.3159  | 4.67E-17 | 7.06E-31 | 0.003091 | 0.020564 |
| IKBK 90651 AP      | -2.31534 | 1.19E-05 | 8.03E-10 | 0.175377 | 0.020594 |
| RBMS3 63805 AA     | 2.313357 | 112.5946 | 2.057756 | 6160.859 | 0.020703 |
| ASH2L 83369 AP     | -2.31292 | 2.87E-05 | 4.06E-09 | 0.202691 | 0.020727 |
| EMP1 20539 ES      | -2.31244 | 8.29E-09 | 1.17E-15 | 0.058636 | 0.020753 |
| ASH2L 83368 AP     | 2.312077 | 34815.79 | 4.916783 | 2.47E+08 | 0.020773 |
| AP4M1 80892 ES     | 2.311086 | 858.6714 | 2.790836 | 264192   | 0.020828 |
| ZNF302 48984 ES    | -2.31059 | 0.000239 | 2.03E-07 | 0.282158 | 0.020855 |
| FCER1G 8599 AT     | -2.31022 | 3.42E-05 | 5.57E-09 | 0.210348 | 0.020876 |
| FCER1G 8600 AT     | 2.310208 | 29224.16 | 4.753771 | 1.8E+08  | 0.020877 |



|                    |          |          |          |          |          |
|--------------------|----------|----------|----------|----------|----------|
| TJP2 86532 AP      | -2.30933 | 0.013155 | 0.000333 | 0.519335 | 0.020925 |
| RBM6 64943 ES      | -2.30846 | 0.012609 | 0.000308 | 0.516739 | 0.020974 |
| SMPD1 14103 AD     | -2.30707 | 0.003919 | 3.54E-05 | 0.434391 | 0.021051 |
| NEK5 25981 AT      | 2.307001 | 65.51846 | 1.875995 | 2288.209 | 0.021055 |
| NEK5 25982 AT      | -2.307   | 0.015263 | 0.000437 | 0.533051 | 0.021055 |
| PDHA1 88633 ES     | -2.30679 | 2.30E-11 | 2.11E-20 | 0.025152 | 0.021067 |
| ABC8 82306 ES      | 2.305329 | 18.83611 | 1.552417 | 228.5462 | 0.021148 |
| RIBC1 89220 AT     | -2.30502 | 0.001701 | 7.52E-06 | 0.384986 | 0.021165 |
| ARL17A 42031 ES    | -2.30496 | 0.046177 | 0.003379 | 0.631099 | 0.021169 |
| ECHDC2 3026 ME     | -2.30448 | 0.00495  | 5.42E-05 | 0.452217 | 0.021196 |
| TRIP4 31124 AA     | -2.30355 | 1.80E-11 | 1.30E-20 | 0.024977 | 0.021248 |
| PRMT1 51043 ES     | 2.302864 | 4240.939 | 3.468449 | 5185477  | 0.021286 |
| CDKN1C 13930 RI    | 2.299981 | 59.14984 | 1.827917 | 1914.039 | 0.021449 |
| ZDHH8 61145 ES     | -2.29922 | 5.86E-13 | 2.19E-23 | 0.015671 | 0.021492 |
| BAIAP2 44100 ES    | -2.29841 | 0.000966 | 2.59E-06 | 0.359783 | 0.021539 |
| NAGK 117487 ES     | 2.298275 | 86.81076 | 1.929134 | 3906.472 | 0.021546 |
| WBP1 54068 ES      | 2.297683 | 3814.394 | 3.360521 | 4329567  | 0.02158  |
| POLR3H 62429 AD    | 2.297537 | 131602.9 | 5.651517 | 3.06E+09 | 0.021588 |
| ERG 60589 AP       | -2.29748 | 0.037038 | 0.002226 | 0.616201 | 0.021591 |
| UBL7 31724 AD      | 2.297453 | 626.8762 | 2.575714 | 152568.8 | 0.021593 |
| PAK6 29956 AP      | -2.29745 | 0.063713 | 0.006083 | 0.667339 | 0.021593 |
| DDX11 20967 ES     | 2.297177 | 2.4E+10  | 33.39601 | 1.72E+19 | 0.021609 |
| KCNC3 51173 AT     | -2.29711 | 5.54E-05 | 1.29E-08 | 0.237296 | 0.021612 |
| KCNC3 51172 AT     | 2.297111 | 18046.02 | 4.214145 | 77277574 | 0.021612 |
| DECR1 84410 ES     | 2.29711  | 8.82E+09 | 28.81795 | 2.7E+18  | 0.021613 |
| C10orf118 13186 AT | -2.29706 | 6.80E-06 | 2.65E-10 | 0.174443 | 0.021615 |
| C10orf118 13185 AT | 2.297055 | 147090   | 5.732422 | 3.77E+09 | 0.021616 |
| MANBAL 59335 AP    | -2.29677 | 0.000246 | 2.05E-07 | 0.295652 | 0.021632 |
| RFC1 69056 AA      | 2.296578 | 1160.493 | 2.813135 | 478733.9 | 0.021643 |
| KRTCAP3 53011 AP   | 2.296318 | 59.95506 | 1.821409 | 1973.532 | 0.021658 |
| JKAMP 27751 AA     | 2.293638 | 38592.15 | 4.647666 | 3.2E+08  | 0.021811 |
| METAP2 23795 AA    | 2.293315 | 186648.9 | 5.836936 | 5.97E+09 | 0.02183  |
| SORT1 4009 AP      | 2.292955 | 785.2033 | 2.632813 | 234177   | 0.021851 |
| IQCK 34334 AT      | -2.29202 | 7.65E-10 | 1.23E-17 | 0.047785 | 0.021904 |
| ABCD4 28376 RI     | 2.292011 | 8588.826 | 3.714622 | 19858801 | 0.021905 |
| IRF5 81731 ES      | -2.29046 | 7.09E-09 | 7.53E-16 | 0.066696 | 0.021995 |
| KRTCAP3 53012 AP   | -2.29011 | 0.016821 | 0.00051  | 0.554929 | 0.022015 |
| SNAPIN 7752 ES     | -2.29006 | 2.15E-10 | 1.15E-18 | 0.040414 | 0.022018 |
| NSD1 74743 RI      | -2.28937 | 0.008195 | 0.000134 | 0.500939 | 0.022058 |
| LMO7 26069 RI      | -2.28895 | 0.004004 | 3.55E-05 | 0.452292 | 0.022082 |
| GOLGA4 63987 ES    | -2.28811 | 0.068266 | 0.006849 | 0.680474 | 0.022131 |
| ZNF233 50311 AT    | -2.28799 | 0.000599 | 1.04E-06 | 0.345152 | 0.022138 |
| ZNF233 50310 AT    | 2.287992 | 1668.703 | 2.897277 | 961099.3 | 0.022138 |
| SLC23A3 57595 AT   | 2.287716 | 526.0028 | 2.453718 | 112759.1 | 0.022154 |
| ZBTB8A 1609 AA     | 2.287294 | 383.1074 | 2.342574 | 62653.85 | 0.022179 |
| PAQR4 33338 ES     | -2.28682 | 1.10E-11 | 4.42E-21 | 0.027128 | 0.022206 |
| EIF3H 84957 ES     | 2.286468 | 291.4299 | 2.248702 | 37769.05 | 0.022227 |
| SLC23A3 57594 AT   | -2.28622 | 0.001907 | 8.89E-06 | 0.409175 | 0.022242 |
| ALG2 87057 ES      | 2.286117 | 208.6984 | 2.142487 | 20329.2  | 0.022247 |
| DAP3 8121 ES       | -2.28581 | 4.69E-11 | 6.52E-20 | 0.033696 | 0.022266 |
| CCDC148 55662 AT   | -2.2858  | 0.03103  | 0.00158  | 0.609548 | 0.022266 |
| COPRS 40163 AP     | -2.28566 | 3.60E-09 | 2.07E-16 | 0.062638 | 0.022274 |
| MATN2 84632 AP     | -2.28558 | 0.031552 | 0.001629 | 0.611174 | 0.022279 |
| LCN6 88203 AP      | 2.284911 | 6.896291 | 1.316022 | 36.13832 | 0.022318 |
| INSIG1 82433 ES    | 2.284623 | 210.4732 | 2.138653 | 20713.5  | 0.022335 |
| GGNBP2 40493 AT    | -2.28321 | 3.37E-13 | 6.61E-24 | 0.017145 | 0.022418 |
| RANGAP1 62414 AP   | 2.28258  | 2691588  | 8.106001 | 8.94E+11 | 0.022455 |
| PPP4R1 44608 ES    | 2.282447 | 185.6472 | 2.09189  | 16475.48 | 0.022463 |

|                   |          |          |          |          |          |
|-------------------|----------|----------|----------|----------|----------|
| CTNS 38480 AD     | -2.28233 | 0.003173 | 2.27E-05 | 0.443705 | 0.02247  |
| IQCK 93918 ES     | -2.28049 | 0.03207  | 0.001668 | 0.616636 | 0.022578 |
| TSPAN4 13789 AP   | -2.27923 | 0.001075 | 3.01E-06 | 0.383875 | 0.022654 |
| PHF20L1 85194 ES  | 2.279025 | 600.2849 | 2.448875 | 147145.9 | 0.022666 |
| G3BP1 74194 AA    | 2.278438 | 12144.19 | 3.723072 | 39612785 | 0.022701 |
| ZNF226 50296 ES   | 2.278297 | 2575.251 | 2.996223 | 2213427  | 0.022709 |
| MKS1 42651 AA     | 2.27824  | 171.1236 | 2.05116  | 14276.45 | 0.022712 |
| RUVBL2 50869 ES   | -2.27823 | 0.187737 | 0.044523 | 0.791617 | 0.022713 |
| CACTIN 46712 RI   | 2.276449 | 9.92E+09 | 24.53519 | 4.01E+18 | 0.022819 |
| TMEM126A 18125 AD | -2.27528 | 1.57E-08 | 2.99E-15 | 0.082924 | 0.022889 |
| SEC31A 69732 ES   | -2.27428 | 0.054128 | 0.004384 | 0.668274 | 0.022949 |
| SUSD4 9910 AT     | -2.27395 | 0.002883 | 1.86E-05 | 0.445924 | 0.022969 |
| CXorf23 88652 AD  | 2.273824 | 41.60354 | 1.672984 | 1034.591 | 0.022977 |
| GPR61 4039 AT     | -2.27238 | 0.001259 | 3.97E-06 | 0.399315 | 0.023064 |
| NEK8 39970 ES     | -2.27189 | 9.16E-12 | 2.75E-21 | 0.030514 | 0.023093 |
| PPP3CB 12152 AP   | -2.27064 | 0.002106 | 1.03E-05 | 0.430313 | 0.023169 |
| DLG4 38844 AP     | 2.26974  | 316.6564 | 2.194231 | 45697.68 | 0.023223 |
| YIPF2 47605 AD    | -2.26859 | 3.26E-05 | 4.32E-09 | 0.245202 | 0.023293 |
| TBC1D5 63665 ME   | 2.267519 | 3836.807 | 3.062753 | 4806489  | 0.023359 |
| GIT2 24378 ES     | -2.26721 | 1.13E-05 | 5.99E-10 | 0.213645 | 0.023378 |
| MRPL48 17725 ES   | 2.266782 | 4004.358 | 3.073389 | 5217328  | 0.023404 |
| BDH1 68299 ES     | -2.26649 | 0.001954 | 8.88E-06 | 0.430157 | 0.023422 |
| MYO1C 38306 AP    | -2.26646 | 0.014504 | 0.000373 | 0.564126 | 0.023423 |
| NCBP2 68271 AD    | 2.266305 | 224020.2 | 5.286993 | 9.49E+09 | 0.023433 |
| NOL3 36955 ES     | 2.266143 | 806.942  | 2.470269 | 263596.9 | 0.023443 |
| CLINT1 74394 AA   | -2.26608 | 0.000394 | 4.48E-07 | 0.346825 | 0.023447 |
| GSTT1 61365 ES    | -2.26603 | 0.009354 | 0.000164 | 0.532044 | 0.02345  |
| CENPV 39431 AA    | -2.2651  | 0.012352 | 0.000276 | 0.553274 | 0.023507 |
| SCML4 77137 AT    | -2.26507 | 0.033083 | 0.001732 | 0.631814 | 0.023508 |
| DLG4 38845 AP     | -2.26407 | 0.003185 | 2.20E-05 | 0.461989 | 0.02357  |
| ZKSCAN3 75740 ES  | -2.26334 | 0.007197 | 0.0001   | 0.516149 | 0.023615 |
| ARFGAP2 15645 ES  | -2.26249 | 8.07E-07 | 4.25E-12 | 0.153203 | 0.023667 |
| NSMF 88309 AT     | -2.26164 | 0.001942 | 8.67E-06 | 0.434798 | 0.02372  |
| MYO5B 45495 AP    | 2.261606 | 8.036504 | 1.320424 | 48.91261 | 0.023722 |
| NFYC 2017 AA      | 2.260243 | 42583315 | 10.31723 | 1.76E+14 | 0.023806 |
| METTL23 43631 AD  | 2.259765 | 54.53689 | 1.699828 | 1749.749 | 0.023836 |
| DNPEP 57689 AD    | 2.258052 | 174.4561 | 1.97664  | 15397.31 | 0.023942 |
| MTMR1 90351 RI    | -2.25738 | 2.73E-12 | 2.49E-22 | 0.029956 | 0.023984 |
| DDX31 87987 AA    | -2.25731 | 2.77E-05 | 3.06E-09 | 0.251031 | 0.023989 |
| PRKAG1 21509 ES   | -2.257   | 9.59E-12 | 2.59E-21 | 0.035477 | 0.024008 |
| TCEANC2 3123 AP   | -2.2561  | 1.07E-09 | 1.71E-17 | 0.066416 | 0.024064 |
| SH3KBP1 88642 AP  | -2.256   | 0.009297 | 0.00016  | 0.541259 | 0.024071 |
| FHL2 54831 AD     | -2.25595 | 0.026012 | 0.001092 | 0.619534 | 0.024073 |
| PFDN5 93147 ES    | 2.255749 | 248.0436 | 2.060547 | 29858.87 | 0.024086 |
| TAF1C 37838 ES    | -2.25545 | 2.57E-08 | 6.54E-15 | 0.101331 | 0.024105 |
| C14orf80 29660 AP | 2.255147 | 32.55552 | 1.577583 | 671.8262 | 0.024124 |
| ARL6IP4 25030 ES  | -2.25467 | 0.001849 | 7.79E-06 | 0.439318 | 0.024154 |
| MYO5B 45493 AP    | -2.25279 | 0.12503  | 0.020483 | 0.763176 | 0.024272 |
| DIP2A 60938 AT    | -2.25216 | 1.57E-05 | 1.03E-09 | 0.23804  | 0.024312 |
| RHOG 14028 AP     | -2.25188 | 1.97E-05 | 1.58E-09 | 0.245463 | 0.02433  |
| ZNF222 50267 ES   | -2.25153 | 0.001362 | 4.36E-06 | 0.42547  | 0.024352 |
| DCAKD 41931 AT    | -2.24904 | 2.15E-16 | 4.79E-30 | 0.009689 | 0.02451  |
| ARL6IP4 25032 AD  | -2.24879 | 1.62E-05 | 1.08E-09 | 0.242498 | 0.024526 |
| CSAD 21968 ES     | -2.24713 | 0.000284 | 2.29E-07 | 0.352164 | 0.024632 |
| SORT1 4008 AP     | -2.24683 | 0.00139  | 4.47E-06 | 0.431752 | 0.024651 |
| FAM195B 44165 AP  | -2.2463  | 1.13E-08 | 1.33E-15 | 0.097104 | 0.024685 |
| MRPL21 17344 AD   | 2.245025 | 11617.34 | 3.282206 | 41119445 | 0.024766 |
| NDUFS8 17276 AP   | -2.24295 | 4.47E-14 | 9.67E-26 | 0.02069  | 0.0249   |

|                    |          |          |          |          |          |
|--------------------|----------|----------|----------|----------|----------|
| TMEM127 54517 AP   | -2.24281 | 3.68E-07 | 8.76E-13 | 0.154356 | 0.024909 |
| GLS2 22441 AA      | 2.242721 | 23.00449 | 1.48489  | 356.3945 | 0.024915 |
| HKR1 49500 ES      | -2.24272 | 0.001422 | 4.62E-06 | 0.437585 | 0.024915 |
| SNCG 12440 AA      | 2.242104 | 433495.9 | 5.120861 | 3.67E+10 | 0.024955 |
| SEMA4B 32469 AP    | -2.24167 | 0.015805 | 0.000421 | 0.593811 | 0.024983 |
| GHRL 63319 ES      | -2.24136 | 0.029756 | 0.001376 | 0.643226 | 0.025003 |
| CCDC25 83176 ES    | -2.23972 | 7.93E-11 | 1.15E-19 | 0.054746 | 0.025109 |
| COPS5 84054 AP     | -2.23936 | 1.46E-14 | 1.14E-26 | 0.018791 | 0.025133 |
| MFSD9 54806 AA     | 2.23927  | 664.5421 | 2.249341 | 196331.4 | 0.025138 |
| ANP32E 7431 AA     | -2.23853 | 5.91E-08 | 2.77E-14 | 0.126043 | 0.025187 |
| RRP8 14161 ES      | -2.23755 | 1.23E-06 | 8.19E-12 | 0.184848 | 0.02525  |
| MYCL 1975 AT       | -2.23734 | 2.11E-05 | 1.69E-09 | 0.263201 | 0.025264 |
| MYCL 1976 AT       | 2.237275 | 47412.72 | 3.798213 | 5.92E+08 | 0.025268 |
| NARG2 30959 AT     | -2.23536 | 6.27E-07 | 2.29E-12 | 0.172133 | 0.025394 |
| NARG2 30962 AT     | 2.235346 | 1593716  | 5.809024 | 4.37E+11 | 0.025395 |
| NBPF10 4441 AP     | 2.235196 | 32870.77 | 3.598975 | 3E+08    | 0.025405 |
| NBPF10 4439 AP     | -2.23518 | 3.04E-05 | 3.33E-09 | 0.277877 | 0.025405 |
| RFXANK 48609 AA    | 2.234312 | 105313.2 | 4.137176 | 2.68E+09 | 0.025463 |
| RRNAD1 8313 RI     | 2.23284  | 533.3462 | 2.154114 | 132053.4 | 0.025559 |
| SFI1 61871 ES      | -2.23263 | 9.36E-18 | 1.05E-32 | 0.008324 | 0.025574 |
| MROH7 3155 AP      | -2.23157 | 0.014296 | 0.000343 | 0.596304 | 0.025643 |
| MRPL47 67700 ES    | -2.23141 | 3.87E-11 | 2.77E-20 | 0.054126 | 0.025654 |
| C5orf45 74948 RI   | 2.230977 | 134.036  | 1.813049 | 9909.077 | 0.025683 |
| SNCA 69932 AD      | 2.230534 | 42.92767 | 1.577812 | 1167.937 | 0.025712 |
| SLC25A10 44158 AP  | 2.230145 | 4944.719 | 2.802488 | 8724476  | 0.025738 |
| SLC25A10 44160 AP  | -2.23014 | 0.000202 | 1.15E-07 | 0.356829 | 0.025738 |
| TENC1 21923 AP     | -2.22903 | 0.030131 | 0.001386 | 0.655246 | 0.025812 |
| C14orf93 26685 RI  | -2.22853 | 1.08E-05 | 4.66E-10 | 0.252141 | 0.025845 |
| RAD1 71743 ES      | -2.22828 | 0.000105 | 3.35E-08 | 0.331991 | 0.025862 |
| CPNE1 59198 ES     | 2.227309 | 47.11581 | 1.587929 | 1397.984 | 0.025927 |
| EFCAB11 28799 AT   | 2.227298 | 538366.8 | 4.873925 | 5.95E+10 | 0.025927 |
| ASCC3 77091 AT     | 2.225866 | 44605374 | 8.19966  | 2.43E+14 | 0.026023 |
| DMKN 49133 AP      | 2.224612 | 12.98435 | 1.356615 | 124.2751 | 0.026107 |
| PPP6R3 92707 AA    | 2.224564 | 51.97847 | 1.599882 | 1688.726 | 0.026111 |
| KCNH6 42933 AT     | -2.22449 | 0.009711 | 0.000164 | 0.576308 | 0.026116 |
| SPATA13 25473 AP   | -2.22419 | 0.000652 | 1.02E-06 | 0.418339 | 0.026136 |
| USB1 36625 AT      | -2.22196 | 2.99E-11 | 1.56E-20 | 0.057427 | 0.026286 |
| METTL3 26599 AA    | -2.22026 | 3.36E-07 | 6.50E-13 | 0.174226 | 0.026401 |
| ANKRD44 56672 AT   | 2.219138 | 411.2087 | 2.019747 | 83719.69 | 0.026477 |
| LILRB1 51921 ES    | -2.21868 | 1.37E-06 | 9.00E-12 | 0.207074 | 0.026508 |
| IL32 33432 ES      | -2.21849 | 1.42E-10 | 2.83E-19 | 0.071191 | 0.026522 |
| MIF4GD 43426 ES    | 2.218476 | 32123.22 | 3.35093  | 3.08E+08 | 0.026522 |
| DFFA 616 AT        | -2.21778 | 4.60E-05 | 6.76E-09 | 0.313201 | 0.02657  |
| DFFA 617 AT        | 2.217781 | 21724.55 | 3.192788 | 1.48E+08 | 0.02657  |
| C11orf48 16385 AP  | 2.217566 | 7860705  | 6.324229 | 9.77E+12 | 0.026584 |
| C11orf48 16384 AP  | -2.21756 | 1.27E-07 | 1.02E-13 | 0.158125 | 0.026585 |
| MTX2 56124 ES      | 2.217108 | 62.97127 | 1.616843 | 2452.545 | 0.026616 |
| KLF3 69021 AT      | -2.21636 | 0.000436 | 4.65E-07 | 0.408508 | 0.026667 |
| ZNF701 51473 ES    | 2.215971 | 11.84713 | 1.330554 | 105.4859 | 0.026694 |
| EFCAB11 28797 AT   | -2.21546 | 1.74E-06 | 1.40E-11 | 0.216656 | 0.026729 |
| POLR2H 67948 ES    | -2.21497 | 3.82E-15 | 6.68E-28 | 0.021886 | 0.026762 |
| C5orf45 74949 ES   | -2.21492 | 6.77E-17 | 3.33E-31 | 0.013764 | 0.026766 |
| AMACR 71701 RI     | -2.2146  | 3.10E-16 | 5.83E-30 | 0.016475 | 0.026788 |
| F11R 8516 AP       | -2.21441 | 0.002377 | 1.13E-05 | 0.499435 | 0.0268   |
| C20orf196 58657 AT | -2.21433 | 0.007172 | 9.07E-05 | 0.567119 | 0.026806 |
| C20orf196 58656 AT | 2.214326 | 139.4282 | 1.76329  | 11024.97 | 0.026806 |
| F11R 8517 AP       | 2.214096 | 420.4808 | 2.00056  | 88377.3  | 0.026822 |
| ATRIPI 64659 ES    | -2.21395 | 2.12E-05 | 1.54E-09 | 0.290887 | 0.026832 |

|                   |          |          |          |          |          |
|-------------------|----------|----------|----------|----------|----------|
| RNH1 13664 AP     | -2.21386 | 0.003959 | 2.96E-05 | 0.530248 | 0.026838 |
| RMND5B 74842 ES   | 2.213844 | 285631.4 | 4.223397 | 1.93E+10 | 0.02684  |
| SNX1 31090 AT     | -2.21308 | 2.06E-14 | 1.56E-26 | 0.027209 | 0.026892 |
| LYSMD4 32723 ES   | 2.212302 | 29.42022 | 1.470672 | 588.54   | 0.026946 |
| R3HDM1 55444 ES   | -2.21176 | 0.016988 | 0.000459 | 0.6288   | 0.026983 |
| GYG1 67206 ES     | 2.211296 | 2.72E+27 | 1312.762 | 5.64E+51 | 0.027015 |
| TMEM184C 70795 AT | -2.21071 | 5.53E-13 | 7.50E-24 | 0.040708 | 0.027056 |
| CEP78 86656 AT    | -2.21064 | 0.008621 | 0.000127 | 0.583315 | 0.027061 |
| CEP78 86655 AT    | 2.210625 | 115.9973 | 1.714296 | 7848.924 | 0.027062 |
| PLXNB1 64637 AP   | 2.209548 | 167.4317 | 1.783192 | 15720.89 | 0.027137 |
| CHTF18 33021 AA   | -2.209   | 5.06E-08 | 1.70E-14 | 0.150465 | 0.027174 |
| EXOC3 71443 ES    | -2.20862 | 1.77E-09 | 3.02E-17 | 0.103415 | 0.027201 |
| STAT3 41041 AA    | 2.208484 | 58.96193 | 1.582129 | 2197.362 | 0.027211 |
| RSPH1 60716 ES    | 2.208207 | 50758.6  | 3.380542 | 7.62E+08 | 0.02723  |
| C19orf60 48491 ES | -2.20817 | 0.006294 | 7.00E-05 | 0.56571  | 0.027233 |
| ZNF720 36291 ES   | 2.208116 | 213.8003 | 1.827472 | 25013    | 0.027236 |
| BOP1 85552 AT     | -2.20617 | 9.65E-07 | 4.37E-12 | 0.213141 | 0.027372 |
| TACC2 13341 ES    | 2.206047 | 24.97182 | 1.431808 | 435.5277 | 0.027381 |
| SF3A1 61730 ES    | 2.206037 | 162.1871 | 1.764073 | 14911.32 | 0.027381 |
| GEMIN6 53288 AD   | -2.20522 | 4.43E-07 | 9.97E-13 | 0.196487 | 0.027439 |
| PHKG2 36179 AA    | 2.204935 | 3333566  | 5.305231 | 2.09E+12 | 0.027459 |
| C1orf50 2112 AA   | -2.20476 | 1.74E-06 | 1.32E-11 | 0.229393 | 0.027471 |
| ZSCAN18 52399 AP  | 2.204552 | 1167107  | 4.711136 | 2.89E+11 | 0.027486 |
| ZSCAN18 52400 AP  | -2.20454 | 8.57E-07 | 3.46E-12 | 0.212278 | 0.027486 |
| RPL28 52096 AT    | 2.203652 | 10838.49 | 2.793846 | 42047026 | 0.027549 |
| SEPT7 79241 AD    | -2.20327 | 0.00459  | 3.82E-05 | 0.551821 | 0.027576 |
| PFDN5 22011 ES    | -2.20229 | 0.000346 | 2.87E-07 | 0.416034 | 0.027645 |
| ZBTB7B 7877 AP    | 2.202211 | 31.36118 | 1.46085  | 673.2545 | 0.02765  |
| CDK7 72327 ES     | -2.20201 | 0.000302 | 2.23E-07 | 0.410339 | 0.027665 |
| RBM4 17097 AD     | 2.201889 | 4.32E+09 | 11.44687 | 1.63E+18 | 0.027673 |
| RASGEF1B 69694 AT | -2.20094 | 9.69E-08 | 5.51E-14 | 0.170646 | 0.02774  |
| RASGEF1B 69695 AT | 2.200907 | 10316292 | 5.858706 | 1.82E+13 | 0.027743 |
| NUP50 62643 ES    | 2.199231 | 104.7924 | 1.658836 | 6619.968 | 0.027861 |
| PLA2G6 62211 AD   | 2.198587 | 102.7086 | 1.653214 | 6380.935 | 0.027907 |
| TCIRG1 17286 AD   | -2.19844 | 4.76E-10 | 2.33E-18 | 0.097452 | 0.027918 |
| ACOT8 59634 ES    | -2.19836 | 3.23E-07 | 5.28E-13 | 0.197752 | 0.027923 |
| PBLD 11926 AT     | -2.19835 | 1.99E-06 | 1.64E-11 | 0.24082  | 0.027924 |
| LARP7 70390 AD    | -2.19834 | 1.91E-06 | 1.52E-11 | 0.2398   | 0.027925 |
| MPPE1 44652 ES    | -2.19816 | 0.000141 | 5.20E-08 | 0.382592 | 0.027938 |
| RFC5 24685 ES     | 2.197169 | 24.8017  | 1.414319 | 434.9263 | 0.028008 |
| CAPN3 30147 AP    | -2.19705 | 0.00997  | 0.000163 | 0.608187 | 0.028017 |
| MRPL2 76236 AT    | 2.196666 | 24899.02 | 2.976542 | 2.08E+08 | 0.028044 |
| MRPL2 76235 AT    | -2.19666 | 4.02E-05 | 4.80E-09 | 0.335976 | 0.028045 |
| ZNHIT3 40469 AT   | -2.19652 | 1.76E-08 | 2.13E-15 | 0.146216 | 0.028055 |
| USP28 18808 ES    | 2.196475 | 54360.85 | 3.235074 | 9.13E+08 | 0.028058 |
| ZNHIT3 40468 AT   | 2.196448 | 56665350 | 6.835537 | 4.7E+14  | 0.02806  |
| CCDC36 64847 AT   | -2.1958  | 0.008356 | 0.000117 | 0.598154 | 0.028106 |
| CCDC36 64848 AT   | 2.195591 | 119.6355 | 1.671059 | 8565.01  | 0.028121 |
| GUCD1 61412 ES    | -2.19442 | 0.028491 | 0.001187 | 0.683754 | 0.028205 |
| SLC39A13 15739 RI | 2.193342 | 25284.54 | 2.940872 | 2.17E+08 | 0.028283 |
| FAM184A 77361 AT  | 2.192612 | 67240.19 | 3.252656 | 1.39E+09 | 0.028335 |
| SEMA4A 8191 ES    | -2.1925  | 1.20E-10 | 1.63E-19 | 0.088685 | 0.028343 |
| TMEM80 13726 AD   | -2.19237 | 1.86E-08 | 2.28E-15 | 0.15151  | 0.028353 |
| NPEPL1 59991 AP   | -2.19234 | 0.000219 | 1.18E-07 | 0.409442 | 0.028355 |
| CFLAR 56790 AT    | 2.192234 | 513433.9 | 4.02747  | 6.55E+10 | 0.028363 |
| SCAMP5 31817 AP   | 2.191525 | 46.98747 | 1.501983 | 1469.939 | 0.028414 |
| FHL1 90188 AP     | -2.18968 | 0.00016  | 6.37E-08 | 0.39964  | 0.028548 |
| DTD2 27119 RI     | 2.189133 | 557.4399 | 1.938589 | 160291.5 | 0.028587 |

|                   |          |          |          |          |          |
|-------------------|----------|----------|----------|----------|----------|
| TADA2A 40518 AT   | -2.18874 | 0.000112 | 3.26E-08 | 0.386477 | 0.028616 |
| NECAB3 59001 RI   | 2.188718 | 312.4854 | 1.822835 | 53568.85 | 0.028617 |
| TADA2A 40520 AT   | 2.188254 | 8900.567 | 2.582403 | 30676888 | 0.028651 |
| SERF1A 72416 AT   | 2.188037 | 6305.817 | 2.489265 | 15973924 | 0.028667 |
| IRX2 71501 RI     | 2.187592 | 21.73268 | 1.377628 | 342.8425 | 0.028699 |
| C14orf79 29592 ES | -2.18736 | 3.61E-06 | 4.81E-11 | 0.271808 | 0.028716 |
| GORASP1 64152 ES  | -2.1869  | 2.81E-12 | 1.24E-22 | 0.063281 | 0.02875  |
| RFFL 40240 ES     | 2.186869 | 54.38905 | 1.513817 | 1954.113 | 0.028752 |
| C2orf81 54050 AP  | 2.186794 | 51.1699  | 1.504082 | 1740.835 | 0.028758 |
| C2orf81 54051 AP  | -2.18679 | 0.019543 | 0.000574 | 0.664867 | 0.028758 |
| LCN6 88202 AP     | -2.18557 | 0.152296 | 0.028167 | 0.823445 | 0.028847 |
| UBE2Q2 31898 ES   | -2.18526 | 0.001048 | 2.23E-06 | 0.492953 | 0.02887  |
| UAP1 8751 ES      | -2.18503 | 0.0462   | 0.00293  | 0.728538 | 0.028887 |
| SHF 30416 ES      | -2.18481 | 0.003337 | 2.00E-05 | 0.556044 | 0.028902 |
| PPIG 55876 AD     | 2.184136 | 5.430599 | 1.189658 | 24.78981 | 0.028952 |
| SLC9B2 70167 AP   | -2.18402 | 0.021274 | 0.000672 | 0.673687 | 0.028961 |
| VPS28 85598 AP    | -2.18318 | 9.40E-10 | 7.40E-18 | 0.119412 | 0.029022 |
| VPS28 85599 AP    | 2.183069 | 1.06E+09 | 8.365867 | 1.35E+17 | 0.029031 |
| SUPT4H1 42666 AD  | 2.183002 | 33670575 | 5.875734 | 1.93E+14 | 0.029036 |
| MBD4 66720 AD     | -2.18265 | 4.95E-05 | 6.74E-09 | 0.363712 | 0.029062 |
| OVOL1 16917 AP    | -2.18209 | 0.008427 | 0.000115 | 0.614955 | 0.029103 |
| HAUS3 68549 ES    | -2.18144 | 0.001248 | 3.07E-06 | 0.507223 | 0.029151 |
| TMEM194B 56574 ES | -2.1811  | 8.23E-05 | 1.76E-08 | 0.385362 | 0.029176 |
| FAM184A 77360 AT  | -2.18087 | 1.54E-05 | 7.26E-10 | 0.325423 | 0.029193 |
| CAD 52954 ES      | -2.18058 | 0.000366 | 2.99E-07 | 0.449097 | 0.029215 |
| CASC1 20784 AA    | 2.17997  | 704100.6 | 3.891812 | 1.27E+11 | 0.02926  |
| RAMP2 41123 ES    | -2.17689 | 1.11E-11 | 1.52E-21 | 0.08096  | 0.029489 |
| FLNB 65419 ES     | -2.1757  | 0.010327 | 0.000168 | 0.635436 | 0.029578 |
| C17orf75 40200 AA | -2.17532 | 8.42E-05 | 1.79E-08 | 0.394987 | 0.029606 |
| PTPN6 20029 AA    | -2.17479 | 0.010357 | 0.000168 | 0.636713 | 0.029646 |
| FAM65B 75540 AT   | 2.174311 | 2347.112 | 2.149181 | 2563272  | 0.029682 |
| EIF6 59071 AP     | -2.1741  | 1.21E-05 | 4.48E-10 | 0.327895 | 0.029697 |
| EIF6 59072 AP     | 2.174099 | 82534.51 | 3.049698 | 2.23E+09 | 0.029698 |
| PTRH2 42790 AP    | -2.17397 | 0.000483 | 4.94E-07 | 0.471555 | 0.029708 |
| PTRH2 42789 AP    | 2.173954 | 2072.205 | 2.120551 | 2024961  | 0.029709 |
| FGF12 68129 AP    | -2.1734  | 0.106014 | 0.01401  | 0.802206 | 0.02975  |
| TECPR2 29416 AT   | 2.173282 | 77130.48 | 3.017897 | 1.97E+09 | 0.029759 |
| PPP4R1 44609 ES   | -2.17313 | 0.032884 | 0.001512 | 0.715362 | 0.02977  |
| UBOX5 58571 ES    | -2.17287 | 0.001647 | 5.08E-06 | 0.533683 | 0.02979  |
| DCAF10 86447 ES   | -2.1727  | 0.000542 | 6.14E-07 | 0.478881 | 0.029803 |
| TECPR2 29415 AT   | -2.1727  | 1.30E-05 | 5.08E-10 | 0.332341 | 0.029803 |
| ANAPC13 66872 AD  | 2.172309 | 16029.35 | 2.57652  | 99723724 | 0.029832 |
| FN1 57398 ES      | -2.17223 | 0.018383 | 0.000499 | 0.676706 | 0.029838 |
| YBEY 60921 AD     | 2.171604 | 1395.741 | 2.025285 | 961885.3 | 0.029886 |
| POLR2H 67947 ES   | -2.17141 | 0.03396  | 0.001603 | 0.719362 | 0.0299   |
| LGMN 29005 ES     | 2.17139  | 21.13809 | 1.345924 | 331.9795 | 0.029902 |
| SETD3 29218 ES    | -2.17065 | 4.31E-08 | 9.64E-15 | 0.192804 | 0.029958 |
| TM2D3 32771 ES    | -2.16942 | 0.00089  | 1.56E-06 | 0.507557 | 0.030051 |
| RPL39L 68070 AP   | 2.169133 | 24.8337  | 1.363087 | 452.438  | 0.030073 |
| RPL39L 68071 AP   | -2.16911 | 0.040271 | 0.002211 | 0.733661 | 0.030075 |
| KIAA1407 66238 AD | 2.168922 | 80.79957 | 1.526733 | 4276.17  | 0.030089 |
| SUSD4 9911 AT     | 2.168311 | 205.9889 | 1.66852  | 25430.59 | 0.030135 |
| DMKN 49132 AP     | -2.16822 | 0.079734 | 0.008106 | 0.784337 | 0.030142 |
| TMEM9B 14289 ES   | -2.1682  | 7.73E-14 | 1.08E-25 | 0.055043 | 0.030143 |
| ARL13B 65699 ES   | -2.16762 | 0.083402 | 0.008825 | 0.788227 | 0.030188 |
| ANKS1B 23885 AT   | 2.167318 | 795.8764 | 1.894666 | 334317.1 | 0.030211 |
| ANKS1B 23886 AT   | -2.16732 | 0.001256 | 2.99E-06 | 0.5278   | 0.030211 |
| FAM71D 28039 AT   | -2.16627 | 0.094108 | 0.011092 | 0.798458 | 0.03029  |

|                   |          |          |          |          |          |
|-------------------|----------|----------|----------|----------|----------|
| DYNLT1 78273 AP   | 2.165558 | 78263.3  | 2.914647 | 2.1E+09  | 0.030345 |
| DYNLT1 78274 AP   | -2.16556 | 1.28E-05 | 4.76E-10 | 0.343095 | 0.030345 |
| MYEF2 30479 AT    | 2.165346 | 13973.3  | 2.472746 | 78962122 | 0.030361 |
| ZNF235 50306 AT   | 2.164731 | 63859.24 | 2.847984 | 1.43E+09 | 0.030408 |
| SLC43A3 15833 AP  | 2.164337 | 125.8811 | 1.578681 | 10037.52 | 0.030438 |
| LMBR1L 21521 AD   | 2.163073 | 2.95E+08 | 6.241953 | 1.4E+16  | 0.030536 |
| MTRFR1L 1212 AA   | -2.16259 | 1.71E-07 | 1.26E-13 | 0.232263 | 0.030573 |
| TM7SF2 16763 ES   | -2.16244 | 1.04E-15 | 2.76E-29 | 0.039559 | 0.030584 |
| RNF213 44046 AT   | -2.16218 | 4.05E-05 | 4.22E-09 | 0.388304 | 0.030605 |
| ANKRD26 11053 AP  | -2.16207 | 0.017336 | 0.000439 | 0.684516 | 0.030613 |
| AUH 86823 AT      | -2.16138 | 7.09E-06 | 1.52E-10 | 0.331235 | 0.030666 |
| AUH 86822 AT      | 2.161321 | 140933.6 | 3.017879 | 6.58E+09 | 0.030671 |
| TMC6 43765 ES     | -2.16011 | 1.67E-06 | 9.59E-12 | 0.291574 | 0.030764 |
| GPR107 87896 ES   | -2.15886 | 0.001056 | 2.10E-06 | 0.531867 | 0.030861 |
| TMEM44 68161 ES   | 2.158633 | 106.0336 | 1.536071 | 7319.409 | 0.030879 |
| PARP3 65117 AA    | -2.15858 | 0.023431 | 0.000775 | 0.707949 | 0.030883 |
| ZNF784 52117 AD   | 2.15844  | 713.5991 | 1.829721 | 278306.7 | 0.030894 |
| RTEL1 60145 AT    | 2.158433 | 135.8107 | 1.570811 | 11742.05 | 0.030894 |
| RTEL1 60144 AT    | -2.15843 | 0.007363 | 8.52E-05 | 0.636616 | 0.030894 |
| TMEM260 27646 ES  | -2.15762 | 0.004651 | 3.54E-05 | 0.611402 | 0.030957 |
| PACRGL 68883 ES   | -2.15732 | 0.009156 | 0.000129 | 0.65093  | 0.030981 |
| MLK4 10329 AT     | -2.15708 | 1.04E-08 | 5.77E-16 | 0.186381 | 0.030999 |
| ASCC3 77092 AT    | -2.15664 | 2.88E-08 | 4.04E-15 | 0.205271 | 0.031033 |
| BZW2 78864 ES     | -2.15664 | 2.18E-11 | 4.47E-21 | 0.106609 | 0.031034 |
| SLC25A35 39149 AT | -2.15663 | 0.000744 | 1.07E-06 | 0.518436 | 0.031035 |
| SLC25A35 39151 AT | 2.156627 | 1344.866 | 1.928879 | 937677.1 | 0.031035 |
| UBE2D4 79369 AT   | -2.15647 | 1.31E-07 | 7.32E-14 | 0.236023 | 0.031047 |
| UBE2D4 79371 AT   | 2.156428 | 7605208  | 4.235572 | 1.37E+13 | 0.03105  |
| KAT8 36242 RI     | 2.155384 | 2287377  | 3.772041 | 1.39E+12 | 0.031132 |
| CCDC84 19052 AD   | 2.155276 | 127.6528 | 1.55185  | 10500.52 | 0.03114  |
| CDC42 1006 ES     | 2.154319 | 11729.89 | 2.328717 | 59084189 | 0.031215 |
| BTN3A1 75662 AA   | 2.152952 | 50337.88 | 2.6392   | 9.6E+08  | 0.031322 |
| ZC3H11A 9454 AP   | 2.152618 | 25.59946 | 1.336698 | 490.2624 | 0.031349 |
| SESN1 77155 AP    | 2.152081 | 85.20934 | 1.487084 | 4882.464 | 0.031391 |
| PHC3 67605 AA     | -2.15169 | 0.00091  | 1.55E-06 | 0.535851 | 0.031422 |
| EPN1 52138 AA     | 2.151387 | 47197864 | 4.817258 | 4.62E+14 | 0.031446 |
| STK11 IP 57739 AD | 2.151285 | 71.70535 | 1.462245 | 3516.275 | 0.031454 |
| EEF1E1 75282 AT   | -2.15108 | 3.59E-07 | 4.82E-13 | 0.267546 | 0.03147  |
| STARD10 17647 AD  | 2.150003 | 116.5838 | 1.522895 | 8924.967 | 0.031555 |
| MED11 38579 AA    | 2.149943 | 865.5456 | 1.817828 | 412123.2 | 0.03156  |
| STAU2 84155 AT    | 2.148718 | 224.802  | 1.609139 | 31405.57 | 0.031657 |
| GCNT2 75296 AP    | -2.14859 | 0.03868  | 0.001991 | 0.751611 | 0.031667 |
| LETMD1 21754 ES   | -2.14848 | 0.0105   | 0.000164 | 0.670462 | 0.031676 |
| SLC25A17 62379 ES | -2.14797 | 1.31E-09 | 1.03E-17 | 0.166974 | 0.031716 |
| GLI4 85408 AA     | -2.14772 | 0.000925 | 1.57E-06 | 0.542953 | 0.031736 |
| MVP 35966 AA      | 2.147397 | 2550.161 | 1.983074 | 3279414  | 0.031762 |
| TTLL3 63216 AA    | 2.147272 | 15.01168 | 1.266545 | 177.9255 | 0.031772 |
| TAB1 62302 AT     | -2.14726 | 2.12E-10 | 3.13E-19 | 0.143263 | 0.031773 |
| LYRM1 34404 AP    | -2.14697 | 0.003136 | 1.62E-05 | 0.605238 | 0.031796 |
| TMEM136 19161 AA  | 2.145904 | 22.67593 | 1.310563 | 392.3488 | 0.031881 |
| PDE4D 72140 AP    | -2.14543 | 0.060535 | 0.00467  | 0.784705 | 0.031918 |
| PPP1R1A 22195 AT  | -2.14465 | 0.039636 | 0.002074 | 0.757312 | 0.031981 |
| PRICKLE3 89098 AT | 2.144584 | 9637.46  | 2.202753 | 42165704 | 0.031986 |
| PRICKLE3 89099 AT | -2.14446 | 0.000104 | 2.38E-08 | 0.454251 | 0.031996 |
| CDPF1 62699 AD    | -2.14387 | 0.000632 | 7.52E-07 | 0.531598 | 0.032043 |
| PPP1R1A 22194 AT  | 2.143678 | 25.20989 | 1.318607 | 481.9774 | 0.032059 |
| USP2 19141 ES     | -2.14288 | 0.012229 | 0.000218 | 0.686653 | 0.032123 |
| EXOC6B 53943 AT   | -2.14287 | 1.47E-14 | 3.28E-27 | 0.065969 | 0.032123 |

|                    |          |          |          |          |          |
|--------------------|----------|----------|----------|----------|----------|
| APTX 86073 AP      | 2.142648 | 575.3341 | 1.719149 | 192542.5 | 0.032141 |
| GAB1 70700 ES      | -2.14212 | 0.017425 | 0.000428 | 0.708653 | 0.032183 |
| GNRH1 83105 RI     | -2.14198 | 0.000601 | 6.79E-07 | 0.532483 | 0.032195 |
| HOMER3 48536 AP    | 2.14187  | 6383.389 | 2.10454  | 19361781 | 0.032204 |
| ANKMY1 58265 AD    | -2.14186 | 0.053072 | 0.003614 | 0.779305 | 0.032204 |
| ZNF611 51548 ES    | -2.14139 | 0.002515 | 1.05E-05 | 0.602247 | 0.032243 |
| FAH 32179 RI       | 2.140256 | 24.44824 | 1.309013 | 456.6161 | 0.032334 |
| ZDHHC15 89528 ES   | -2.1402  | 0.006641 | 6.73E-05 | 0.655545 | 0.032339 |
| SYT9 14193 AT      | 2.139516 | 31.15346 | 1.334558 | 727.2355 | 0.032394 |
| RNF7 67078 ES      | 2.138825 | 190.5123 | 1.551175 | 23398.35 | 0.03245  |
| IL17RC 63262 ES    | 2.138777 | 11829.05 | 2.190387 | 63882036 | 0.032454 |
| APCDD1 44629 ES    | -2.13873 | 3.76E-05 | 3.30E-09 | 0.426683 | 0.032458 |
| COL1A1 402674 ES   | 2.138614 | 621.3594 | 1.711367 | 225601.8 | 0.032467 |
| MYEF2 30481 AT     | -2.13838 | 0.000572 | 6.09E-07 | 0.536317 | 0.032486 |
| MAT2B 74448 AP     | 2.138155 | 15892.26 | 2.239342 | 1.13E+08 | 0.032504 |
| MAT2B 74449 AP     | -2.13815 | 6.29E-05 | 8.87E-09 | 0.446574 | 0.032505 |
| THOC5 61617 ES     | 2.137864 | 53.05756 | 1.391626 | 2022.888 | 0.032528 |
| ZNF415 51678 ES    | 2.137862 | 35.90685 | 1.347135 | 957.0692 | 0.032528 |
| ACADM 3492 ES      | -2.13778 | 5.07E-05 | 5.86E-09 | 0.43932  | 0.032535 |
| ASCC1 12079 ES     | 2.137501 | 94.40358 | 1.458946 | 6108.545 | 0.032557 |
| LRRFIP2 63981 AD   | -2.13733 | 0.000114 | 2.76E-08 | 0.470743 | 0.032572 |
| ZNF726 48832 AT    | 2.136786 | 786.9287 | 1.736373 | 356638.1 | 0.032615 |
| DAPK2 31076 ES     | 2.136667 | 757.434  | 1.730307 | 331563.3 | 0.032625 |
| NPRL2 65036 AA     | -2.13644 | 0.000103 | 2.24E-08 | 0.468243 | 0.032643 |
| TCTN1 24462 AA     | -2.13628 | 1.52E-10 | 1.49E-19 | 0.154754 | 0.032656 |
| NQO1 37304 ES      | 2.136229 | 3.38E+12 | 10.80808 | 1.05E+24 | 0.032661 |
| PET100 47118 AT    | -2.13607 | 4.67E-12 | 1.87E-22 | 0.116374 | 0.032674 |
| SLAMF7 8485 ES     | -2.13603 | 0.000235 | 1.10E-07 | 0.502247 | 0.032677 |
| LAMA4 77295 AT     | -2.1349  | 1.76E-10 | 1.95E-19 | 0.158747 | 0.032769 |
| DMKN 49200 ES      | -2.13464 | 0.006184 | 5.80E-05 | 0.65957  | 0.03279  |
| MAEA 68467 AP      | -2.13398 | 1.12E-14 | 1.72E-27 | 0.07284  | 0.032844 |
| DCTD 96837 ES      | 2.133212 | 5763.937 | 2.020343 | 16444227 | 0.032907 |
| ZCCHC11 3009 AA    | 2.133137 | 104.5927 | 1.458639 | 7499.891 | 0.032913 |
| ACP5 47750 ES      | -2.13312 | 0.018021 | 0.00045  | 0.721794 | 0.032915 |
| NVL 9942 ME        | 2.132942 | 16.15359 | 1.253108 | 208.2331 | 0.032929 |
| NMRAL1 33740 AD    | 2.132768 | 36.86892 | 1.339481 | 1014.81  | 0.032944 |
| PDCD11 13007 ES    | 2.132447 | 12.76821 | 1.228767 | 132.6755 | 0.03297  |
| SH3KBP1 88643 AP   | 2.132367 | 18.28066 | 1.264831 | 264.2111 | 0.032977 |
| EIF4E3 65610 AP    | -2.13191 | 0.002986 | 1.43E-05 | 0.625699 | 0.033015 |
| MXI1 13082 ES      | 2.131806 | 3.84E+11 | 8.586619 | 1.72E+22 | 0.033023 |
| LCK 1583 ES        | -2.13173 | 0.000921 | 1.49E-06 | 0.56936  | 0.033029 |
| ANGPTL1 9095 ES    | -2.12963 | 0.012636 | 0.000226 | 0.705916 | 0.033202 |
| KIAA0226L 25827 AP | -2.12956 | 0.077488 | 0.007361 | 0.815722 | 0.033208 |
| NT5DC2 65224 AP    | 2.12954  | 238.0957 | 1.546185 | 36664.14 | 0.03321  |
| NT5DC2 65225 AP    | -2.12954 | 0.0042   | 2.73E-05 | 0.646753 | 0.03321  |
| ZNF574 50117 AP    | -2.1292  | 0.006073 | 5.53E-05 | 0.666527 | 0.033238 |
| ZSCAN31 75730 AP   | -2.12881 | 0.157126 | 0.028592 | 0.86348  | 0.03327  |
| RILP 38360 ES      | 2.127505 | 9.36E+09 | 6.098566 | 1.44E+19 | 0.033378 |
| TSR1 38389 ES      | -2.12744 | 0.000203 | 8.07E-08 | 0.512107 | 0.033384 |
| EPOR 47694 ES      | -2.12661 | 0.002005 | 6.54E-06 | 0.614605 | 0.033453 |
| PHYHD1 87799 ES    | -2.12619 | 7.94E-05 | 1.32E-08 | 0.478041 | 0.033488 |
| IL15RA 10678 AA    | 2.125546 | 586.8661 | 1.643129 | 209607.3 | 0.033541 |
| APOC1 50357 AP     | -2.12413 | 0.014352 | 0.000286 | 0.720365 | 0.033659 |
| ACADM 3510 ES      | -2.12252 | 0.001788 | 5.19E-06 | 0.615986 | 0.033794 |
| ERN1 43052 AT      | 2.122168 | 161.5572 | 1.474991 | 17695.52 | 0.033824 |
| ERN1 43053 AT      | -2.12217 | 0.00619  | 5.65E-05 | 0.677972 | 0.033824 |
| IER2 47930 AP      | 2.121888 | 133.0811 | 1.452425 | 12193.8  | 0.033847 |
| IER2 47929 AP      | -2.12189 | 0.007514 | 8.20E-05 | 0.688504 | 0.033847 |

|                     |          |          |          |          |          |
|---------------------|----------|----------|----------|----------|----------|
| CNDP2 45811 AP      | -2.12107 | 0.00068  | 8.04E-07 | 0.574642 | 0.033916 |
| RAG1 15433 AT       | 2.120729 | 9.898287 | 1.189789 | 82.34748 | 0.033945 |
| DYRK1B 49843 AT     | -2.12038 | 2.28E-19 | 1.34E-36 | 0.038876 | 0.033974 |
| COPS4 69764 ES      | 2.120268 | 5.29E+13 | 10.90395 | 2.57E+26 | 0.033983 |
| CLSPN 1730 AT       | -2.11986 | 0.021187 | 0.0006   | 0.747715 | 0.034017 |
| CLSPN 1731 AT       | 2.119849 | 47.19597 | 1.337367 | 1665.555 | 0.034019 |
| MCFD2 53472 AP      | 2.119621 | 3619.34  | 1.853739 | 7066595  | 0.034038 |
| HS1BP3 52778 AT     | -2.11836 | 6.09E-05 | 7.68E-09 | 0.483975 | 0.034144 |
| RAG1 15432 AT       | -2.11783 | 0.101218 | 0.012153 | 0.843045 | 0.03419  |
| WDR27 78474 ES      | 2.117667 | 13.13743 | 1.211422 | 142.4707 | 0.034203 |
| ANKRD10 26274 ES    | -2.11742 | 0.024359 | 0.000782 | 0.758625 | 0.034224 |
| FAM21A 11563 ES     | -2.11729 | 0.017781 | 0.000427 | 0.741248 | 0.034235 |
| MFF 57798 ES        | -2.117   | 0.003497 | 1.86E-05 | 0.657338 | 0.03426  |
| METTL23 43632 ES    | -2.11698 | 0.09395  | 0.010519 | 0.839116 | 0.034262 |
| SCAP 64519 ES       | 2.116411 | 1.36E+18 | 21.90216 | 8.47E+34 | 0.03431  |
| GSTT1 61384 ES      | -2.11553 | 2.58E-06 | 1.71E-11 | 0.388191 | 0.034384 |
| STAU2 84157 AT      | -2.1153  | 0.005558 | 4.52E-05 | 0.68297  | 0.034404 |
| FUZ 51084 AD        | -2.11484 | 6.08E-06 | 8.90E-11 | 0.414935 | 0.034443 |
| CCDC41 23730 ES     | 2.113966 | 2254.658 | 1.754978 | 2896608  | 0.034518 |
| UBXN4 55450 ES      | -2.1138  | 0.0304   | 0.001192 | 0.775511 | 0.034532 |
| IFI27 29088 AA      | 2.113617 | 28160.69 | 2.106078 | 3.77E+08 | 0.034548 |
| CCT7 53961 ES       | -2.11352 | 0.076407 | 0.007037 | 0.829578 | 0.034557 |
| PIGQ 32903 ES       | -2.11299 | 0.052767 | 0.003445 | 0.808107 | 0.034601 |
| IMMP1L 14819 ES     | -2.11283 | 0.00288  | 1.27E-05 | 0.654918 | 0.034616 |
| SERF1B 72405 AT     | 2.111578 | 11406.68 | 1.955733 | 66528736 | 0.034723 |
| STX16 59984 ES      | -2.11114 | 0.010507 | 0.000153 | 0.721638 | 0.03476  |
| ATG4B 58404 ES      | 2.109741 | 12539.8  | 1.954115 | 80469484 | 0.034881 |
| CHMP7 83076 AD      | -2.10956 | 0.000374 | 2.45E-07 | 0.571448 | 0.034896 |
| TET2 70187 AT       | -2.10949 | 0.006099 | 5.34E-05 | 0.69665  | 0.034902 |
| TET2 70188 AT       | 2.109489 | 163.9505 | 1.435435 | 18725.88 | 0.034902 |
| CSTF3 14887 ME      | -2.10948 | 0.00272  | 1.12E-05 | 0.65791  | 0.034903 |
| RHEB 82378 AP       | 2.108106 | 4385.84  | 1.802752 | 10670130 | 0.035022 |
| GOLGA7 83513 AA     | 2.107703 | 30160.39 | 2.060558 | 4.41E+08 | 0.035057 |
| RASSF3 22860 ES     | -2.10763 | 7.42E-06 | 1.26E-10 | 0.437141 | 0.035063 |
| HLTF 67209 AA       | -2.10715 | 0.011719 | 0.000187 | 0.733015 | 0.035105 |
| TLE1 86673 AT       | 2.10655  | 2327.467 | 1.715091 | 3158492  | 0.035157 |
| UBB 39435 AD        | 2.10649  | 13.05785 | 1.195692 | 142.6015 | 0.035162 |
| CD44 15056 ES       | -2.10646 | 0.040925 | 0.002092 | 0.800699 | 0.035164 |
| TENC1 21925 AP      | 2.106292 | 32.27729 | 1.272993 | 818.4053 | 0.035179 |
| FPGT-TNNI3K 3457 AT | 2.106035 | 9.113527 | 1.165634 | 71.25424 | 0.035201 |
| FAM204A 13246 ES    | -2.10544 | 9.56E-12 | 5.27E-22 | 0.17321  | 0.035253 |
| C11orf54 18326 ES   | 2.105391 | 29.82271 | 1.264306 | 703.4638 | 0.035257 |
| BCL2L1 58902 AA     | -2.1053  | 0.000377 | 2.45E-07 | 0.580308 | 0.035265 |
| NAT9 43294 ES       | -2.10517 | 0.040881 | 0.002084 | 0.802104 | 0.035277 |
| ZNF587B 52344 AP    | 2.105076 | 47.79737 | 1.305476 | 1750.005 | 0.035285 |
| NDUFB10 33166 RI    | 2.10499  | 1808.993 | 1.676584 | 1951860  | 0.035292 |
| BRMS1L 27244 AT     | 2.104484 | 1.13E+47 | 1703.185 | 7.50E+90 | 0.035336 |
| GEMIN7 50398 ES     | 2.104059 | 42.32568 | 1.2924   | 1386.152 | 0.035373 |
| JUP 40932 RI        | 2.103523 | 5411.634 | 1.797993 | 16288038 | 0.03542  |
| ZC3H11A 9455 AP     | -2.10349 | 0.040404 | 0.002032 | 0.803369 | 0.035423 |
| DNAJB12 12088 AP    | -2.10344 | 2.17E-10 | 2.15E-19 | 0.219196 | 0.035427 |
| CHTOP 7751 AA       | -2.10341 | 2.56E-05 | 1.34E-09 | 0.486207 | 0.03543  |
| ZNF397 45149 AD     | 2.103055 | 9.536109 | 1.165832 | 78.00211 | 0.035461 |
| YIPF1 3074 ES       | 2.102989 | 4635.187 | 1.775543 | 12100502 | 0.035467 |
| NSRP1 40075 AT      | -2.10295 | 5.06E-11 | 1.28E-20 | 0.199498 | 0.03547  |
| OXSR1 64042 ES      | 2.101733 | 4468.224 | 1.762843 | 11325468 | 0.035577 |
| SAC3D1 16732 RI     | 2.101725 | 25.19983 | 1.243151 | 510.824  | 0.035577 |
| FEZ2 53197 ES       | 2.10108  | 4.01E+08 | 3.783039 | 4.26E+16 | 0.035634 |



|                   |          |          |          |          |          |
|-------------------|----------|----------|----------|----------|----------|
| ZNF268 25351 ES   | -2.10084 | 0.003128 | 1.44E-05 | 0.679264 | 0.035655 |
| EPS15L1 48161 ES  | 2.100025 | 113.6537 | 1.371187 | 9420.431 | 0.035727 |
| ZNF177 47313 ES   | -2.09981 | 0.021821 | 0.000614 | 0.775119 | 0.035745 |
| SCIN 78817 ES     | -2.09965 | 0.000112 | 2.32E-08 | 0.546113 | 0.03576  |
| EIF4G1 67892 ES   | -2.09918 | 0.064065 | 0.004925 | 0.833406 | 0.035801 |
| NACA 22488 AD     | 2.099168 | 57.3886  | 1.308081 | 2517.773 | 0.035802 |
| CES4A 36915 ES    | -2.09913 | 2.17E-06 | 1.12E-11 | 0.421188 | 0.035805 |
| ALS2CL 64466 RI   | 2.098106 | 199.6737 | 1.417283 | 28131.01 | 0.035896 |
| ZNF675 48822 AT   | 2.097895 | 311761.2 | 2.297227 | 4.23E+10 | 0.035914 |
| DMKN 49142 AD     | 2.097749 | 2050.572 | 1.65018  | 2548112  | 0.035927 |
| DNAJC17 30040 AA  | 2.097052 | 5.11E+08 | 3.709055 | 7.03E+16 | 0.035989 |
| ADAM15 7897 ES    | -2.09704 | 0.01933  | 0.000484 | 0.772643 | 0.03599  |
| LRRC23 20001 ES   | 2.096878 | 4566.826 | 1.733609 | 12030335 | 0.036004 |
| RAB28 265743 ME   | 2.096127 | 1896.563 | 1.632809 | 2202922  | 0.036071 |
| PRR14 36165 AP    | 2.095659 | 1762.586 | 1.622518 | 1914746  | 0.036112 |
| PRR14 36164 AP    | -2.09565 | 0.000567 | 5.22E-07 | 0.616343 | 0.036113 |
| DHRS4 26788 ES    | 2.095549 | 17.13972 | 1.201827 | 244.4363 | 0.036122 |
| CEACAM1 50164 ME  | -2.09553 | 0.005434 | 4.14E-05 | 0.713649 | 0.036124 |
| MMAB 24331 ES     | 2.095261 | 1.78E+14 | 8.320968 | 3.80E+27 | 0.036148 |
| DDO 77229 ES      | 2.095217 | 72.04911 | 1.318002 | 3938.593 | 0.036152 |
| HAX1 7823 ES      | -2.09483 | 0.002359 | 8.22E-06 | 0.677414 | 0.036186 |
| RUVBL2 50864 AD   | 2.094475 | 44.64542 | 1.276298 | 1561.715 | 0.036218 |
| TSTD1 8526 ES     | -2.0941  | 0.009731 | 0.000127 | 0.743242 | 0.036251 |
| TFDP2 67090 AA    | 2.094091 | 199.5153 | 1.403827 | 28355.59 | 0.036252 |
| SEPT2 58377 ES    | -2.09354 | 4.89E-07 | 6.04E-13 | 0.395682 | 0.036301 |
| C18orf32 45473 AP | -2.09354 | 1.28E-13 | 1.10E-25 | 0.150482 | 0.036301 |
| ZMYND8 59711 AP   | 2.092933 | 112.9493 | 1.350283 | 9448.047 | 0.036355 |
| GCNT1 86638 ES    | -2.0928  | 0.008707 | 0.000102 | 0.740006 | 0.036367 |
| GRK6 74764 AT     | -2.09246 | 2.37E-10 | 2.28E-19 | 0.245746 | 0.036398 |
| NFE2L1 42157 AP   | -2.09235 | 0.009339 | 0.000117 | 0.744005 | 0.036407 |
| CSF2RA 88365 ES   | -2.09147 | 0.000285 | 1.35E-07 | 0.598472 | 0.036486 |
| SNX5 58748 RI     | 2.09075  | 41.61888 | 1.262683 | 1371.787 | 0.03655  |
| NUDT18 82937 RI   | 2.090638 | 106.7192 | 1.338981 | 8505.709 | 0.03656  |
| ACP6 7383 AT      | -2.08846 | 0.026835 | 0.0009   | 0.800432 | 0.036757 |
| ACP6 7384 AT      | 2.088436 | 37.26402 | 1.249279 | 1111.527 | 0.036759 |
| DDX17 62239 AD    | -2.08791 | 0.00014  | 3.38E-08 | 0.58055  | 0.036806 |
| CREM 11244 AD     | -2.08755 | 0.024165 | 0.000733 | 0.796499 | 0.036839 |
| LTBP4 49936 ES    | 2.086965 | 1046.439 | 1.526734 | 717239.9 | 0.036891 |
| TRIM14 87027 AP   | -2.08681 | 3.38E-07 | 2.82E-13 | 0.404211 | 0.036905 |
| PTBP1 46317 ES    | -2.08658 | 5.06E-06 | 5.38E-11 | 0.477162 | 0.036926 |
| FAM110A 58466 AP  | -2.08651 | 0.004727 | 3.09E-05 | 0.72271  | 0.036932 |
| ZNF302 48983 AA   | 2.086256 | 49.66968 | 1.266698 | 1947.645 | 0.036955 |
| MATN2 84633 AP    | 2.085962 | 17.25736 | 1.187727 | 250.7449 | 0.036982 |
| LUC7L 32842 RI    | 2.085806 | 4845607  | 2.531297 | 9.28E+12 | 0.036996 |
| PQLC1 46259 ES    | -2.08535 | 0.00091  | 1.26E-06 | 0.656391 | 0.037037 |
| TARDBP 634 ES     | -2.08509 | 6.01E-09 | 1.13E-16 | 0.321104 | 0.037061 |
| RHEB 82377 AP     | -2.08448 | 0.000238 | 9.29E-08 | 0.607456 | 0.037117 |
| MFSD10 68614 RI   | 2.084317 | 6270.457 | 1.684814 | 23337070 | 0.037131 |
| VKORC1 36233 ES   | 2.084291 | 1.01E+17 | 10.33409 | 9.85E+32 | 0.037134 |
| TLE1 86675 AT     | -2.08419 | 0.000478 | 3.61E-07 | 0.634021 | 0.037143 |
| ABCD4 28386 ES    | -2.08415 | 0.002118 | 6.47E-06 | 0.692877 | 0.037146 |
| BECN1 41142 AD    | -2.0841  | 0.000829 | 1.05E-06 | 0.655331 | 0.037151 |
| RABL3 66379 ES    | -2.08351 | 9.59E-09 | 2.75E-16 | 0.334597 | 0.037204 |
| EVI5L 47191 ES    | 2.082833 | 385.6406 | 1.420895 | 104665.5 | 0.037266 |
| RIBC1 89219 AT    | 2.082828 | 161.6803 | 1.349852 | 19365.48 | 0.037267 |
| P4HA2 73262 ES    | -2.08114 | 0.008703 | 9.98E-05 | 0.758643 | 0.037421 |
| PTBP1 46318 ES    | -2.08102 | 1.61E-05 | 4.90E-10 | 0.52613  | 0.037432 |
| FAM173B 71547 ES  | -2.08076 | 0.004287 | 2.52E-05 | 0.728678 | 0.037456 |

|                       |          |          |          |          |          |
|-----------------------|----------|----------|----------|----------|----------|
| BCAT2 50816 ES        | 2.079857 | 52.62314 | 1.256657 | 2203.621 | 0.037539 |
| HNRNPH3 11928 AD      | -2.07984 | 6.34E-06 | 8.00E-11 | 0.501642 | 0.03754  |
| LSR 49088 ES          | -2.07914 | 0.000242 | 9.44E-08 | 0.620476 | 0.037605 |
| GNB2L1 127737 ES      | 2.079059 | 22.61207 | 1.195586 | 427.6611 | 0.037612 |
| SULT1A2 35758 AA      | 2.079053 | 810.4693 | 1.46762  | 447568.6 | 0.037612 |
| CACTIN 46714 ES       | -2.07894 | 0.015222 | 0.000294 | 0.787016 | 0.037623 |
| SMAGP 21829 AP        | -2.07889 | 0.002772 | 1.08E-05 | 0.714021 | 0.037627 |
| TAF6 80899 AD         | 2.077961 | 5427.791 | 1.629559 | 18079073 | 0.037713 |
| ZNF419 52268 AT       | 2.077858 | 791694.3 | 2.161089 | 2.9E+11  | 0.037722 |
| ZNF419 52269 AT       | -2.07785 | 1.26E-06 | 3.45E-12 | 0.462741 | 0.037723 |
| WDR91 81880 AP        | -2.0776  | 9.33E-05 | 1.47E-08 | 0.591297 | 0.037746 |
| RBMS2 22465 ME        | 2.077502 | 6047.128 | 1.636619 | 22343472 | 0.037755 |
| CYP51A1 80417 AP      | -2.0771  | 0.017218 | 0.000373 | 0.795277 | 0.037792 |
| TRIM9 27505 AT        | 2.076525 | 28.4398  | 1.206738 | 670.2554 | 0.037845 |
| HCFC1R1 33354 ES      | -2.07604 | 8.89E-06 | 1.51E-10 | 0.521889 | 0.03789  |
| CRYGN 152609 AD       | 2.076014 | 184.0394 | 1.338474 | 25305.32 | 0.037893 |
| ISLR 31676 AP         | 2.075973 | 22.75936 | 1.190805 | 434.9904 | 0.037896 |
| ETV4 41711 AP         | 2.075532 | 239.0056 | 1.356538 | 42109.89 | 0.037937 |
| ELOF1 47744 ES        | 2.074869 | 1.38E+12 | 4.702836 | 4.07E+23 | 0.037999 |
| AKAP8L 48085 ES       | -2.0748  | 0.001102 | 1.77E-06 | 0.685949 | 0.038005 |
| CACNB1 40629 ES       | -2.07459 | 0.003628 | 1.80E-05 | 0.733113 | 0.038025 |
| DNAH9 39292 AT        | -2.07437 | 0.018643 | 0.000433 | 0.802814 | 0.038045 |
| ANKDD1A 31138 AT      | -2.07415 | 0.000135 | 2.97E-08 | 0.612288 | 0.038065 |
| ANKDD1A 31137 AT      | 2.074142 | 7411.177 | 1.633169 | 33631277 | 0.038066 |
| VSTM4 11499 AT        | 2.073591 | 1651.773 | 1.500843 | 1817883  | 0.038117 |
| VSTM4 11498 AT        | -2.07357 | 0.000605 | 5.50E-07 | 0.666341 | 0.038119 |
| TMEM14B 75312 AT      | -2.07326 | 6.88E-06 | 9.05E-11 | 0.522259 | 0.038148 |
| RPS15 46490 RI        | 2.072975 | 31.64856 | 1.207241 | 829.6861 | 0.038175 |
| ARAP3 73825 ES        | -2.07218 | 0.002244 | 7.00E-06 | 0.718703 | 0.038249 |
| LSM14A 48951 ES       | 2.072032 | 8613.166 | 1.632442 | 45445188 | 0.038262 |
| ISLR 31677 AP         | -2.07164 | 0.044079 | 0.002299 | 0.845114 | 0.038299 |
| C18orf8 44832 ES      | -2.07109 | 4.41E-13 | 8.95E-25 | 0.217293 | 0.03835  |
| CREBRF 74575 AT       | -2.07061 | 5.89E-13 | 1.56E-24 | 0.22206  | 0.038395 |
| EPOR 47693 ES         | -2.06924 | 0.129402 | 0.018654 | 0.897637 | 0.038523 |
| AP1G1 37491 ES        | -2.06892 | 4.32E-05 | 3.17E-09 | 0.589065 | 0.038553 |
| TGFBR3 3742 AP        | -2.06883 | 0.000309 | 1.46E-07 | 0.653586 | 0.038562 |
| ZNF415 51679 ES       | 2.068313 | 15.22895 | 1.153333 | 201.0875 | 0.038611 |
| NDEL1 39184 AP        | -2.06826 | 1.28E-09 | 4.80E-18 | 0.342285 | 0.038615 |
| NCBP2 68263 AP        | -2.06808 | 9.45E-10 | 2.64E-18 | 0.337459 | 0.038633 |
| ZNF585B 101324 ME     | 2.067359 | 15064.27 | 1.648301 | 1.38E+08 | 0.0387   |
| MVK 24347 ES          | -2.06713 | 0.002958 | 1.18E-05 | 0.739401 | 0.038721 |
| CHI3L2 4146 AP        | 2.067005 | 8.675672 | 1.118383 | 67.30008 | 0.038734 |
| METTL23 43633 ES      | -2.06694 | 6.45E-05 | 6.86E-09 | 0.606912 | 0.038739 |
| MRPL55 10069 ES       | -2.06681 | 6.94E-05 | 7.91E-09 | 0.60958  | 0.038752 |
| FN1 57392 AA          | -2.06662 | 4.56E-06 | 3.92E-11 | 0.530094 | 0.03877  |
| CABIN1 61390 AD       | -2.06652 | 0.000591 | 5.13E-07 | 0.681618 | 0.038779 |
| FCF1 28425 AD         | -2.06644 | 0.00012  | 2.28E-08 | 0.627945 | 0.038787 |
| ALG10 21066 AD        | -2.06625 | 0.004634 | 2.83E-05 | 0.758472 | 0.038805 |
| NPAS3 27142 AT        | -2.06555 | 0.00029  | 1.27E-07 | 0.659384 | 0.038871 |
| SETMAR 62996 AA       | 2.065316 | 121.9181 | 1.277645 | 11633.92 | 0.038893 |
| DKFZP761J1410 47687 A | 2.064966 | 295.5048 | 1.335445 | 65388.75 | 0.038926 |
| ACTN1 28118 ES        | -2.0649  | 1.38E-05 | 3.37E-10 | 0.566304 | 0.038932 |
| KIAA1598 13243 ES     | -2.06481 | 0.000468 | 3.23E-07 | 0.677521 | 0.038941 |
| ANKS3 33838 ES        | 2.06473  | 18.81045 | 1.16055  | 304.884  | 0.038949 |
| IL1RAP 68106 AT       | 2.063687 | 547.9616 | 1.372941 | 218699.8 | 0.039047 |
| HNRNPU1 50034 AA      | -2.06334 | 0.000524 | 4.01E-07 | 0.684941 | 0.03908  |
| GRAMD1A 49013 ES      | -2.06324 | 4.45E-15 | 1.04E-28 | 0.191265 | 0.03909  |
| ZSCAN32 33556 ES      | -2.06288 | 0.050905 | 0.003006 | 0.86195  | 0.039124 |

|                    |          |          |          |          |          |
|--------------------|----------|----------|----------|----------|----------|
| SLC39A9 28148 ES   | -2.06257 | 8.44E-06 | 1.27E-10 | 0.559245 | 0.039154 |
| MRPL35 54418 RI    | 2.062232 | 1.28E+11 | 3.554719 | 4.60E+21 | 0.039186 |
| LINS 32734 AT      | -2.06207 | 0.002422 | 7.90E-06 | 0.742112 | 0.039201 |
| LINS 32733 AT      | 2.062072 | 412.9245 | 1.347505 | 126535   | 0.039201 |
| VWA9 31210 ES      | 2.061761 | 44.27168 | 1.205801 | 1625.461 | 0.03923  |
| C7orf31 79030 AD   | 2.060856 | 1199.648 | 1.414946 | 1017109  | 0.039317 |
| BCL2L13 60990 ES   | -2.06002 | 4.34E-08 | 4.30E-15 | 0.438931 | 0.039396 |
| NKIRAS1 63722 AA   | 2.059977 | 2175385  | 2.030916 | 2.33E+12 | 0.039401 |
| GTF2H3 25106 ES    | -2.0599  | 1.85E-10 | 1.01E-19 | 0.337131 | 0.039408 |
| ZNF101 48677 RI    | 2.05942  | 589.6592 | 1.360822 | 255505.9 | 0.039454 |
| EFCAB11 28801 AA   | -2.05917 | 1.23E-07 | 3.25E-14 | 0.464583 | 0.039478 |
| C11orf54 18325 AA  | -2.05875 | 0.003212 | 1.36E-05 | 0.759217 | 0.039518 |
| CREM 11231 AP      | -2.05818 | 0.004478 | 2.60E-05 | 0.772514 | 0.039573 |
| ZNF587B 52345 AP   | -2.05769 | 0.023276 | 0.000648 | 0.836446 | 0.03962  |
| ZNF200 33465 AD    | 2.057491 | 197838.8 | 1.78259  | 2.2E+10  | 0.039639 |
| SMARCD1 21641 AP   | -2.05733 | 3.30E-05 | 1.78E-09 | 0.613674 | 0.039655 |
| MRPS17 79761 AP    | -2.05729 | 3.58E-05 | 2.08E-09 | 0.616073 | 0.039658 |
| BLOC1S1 22229 AP   | 2.057082 | 7.21E+22 | 11.99933 | 4.33E+44 | 0.039678 |
| GSTM2 4061 AT      | -2.05661 | 5.19E-09 | 6.60E-17 | 0.408021 | 0.039724 |
| TAZ 90586 ES       | -2.05656 | 0.000664 | 6.21E-07 | 0.709127 | 0.039728 |
| CIZ1 87714 RI      | -2.05625 | 4.40E-10 | 5.31E-19 | 0.364654 | 0.039759 |
| ZNF302 48994 AD    | 2.05612  | 13.83731 | 1.130738 | 169.3328 | 0.039771 |
| PARP10 85520 AD    | -2.05595 | 6.26E-10 | 1.05E-18 | 0.371786 | 0.039787 |
| DISP1 9903 AT      | -2.05544 | 4.73E-12 | 7.52E-23 | 0.297803 | 0.039836 |
| CNTROB 39079 AA    | 2.053711 | 308.8483 | 1.299124 | 73424.29 | 0.040004 |
| CENPN 37745 ES     | -2.05353 | 0.000172 | 4.41E-08 | 0.673783 | 0.040022 |
| WDR11 13290 ES     | 2.053191 | 6.39E+22 | 10.85168 | 3.76E+44 | 0.040054 |
| C2orf74 53688 AP   | -2.05254 | 2.35E-06 | 9.93E-12 | 0.557366 | 0.040117 |
| LETMD1 21761 ES    | 2.052536 | 2143.54  | 1.413313 | 3251060  | 0.040118 |
| SMIM7 48189 AD     | 2.052189 | 573.7503 | 1.330383 | 247439.5 | 0.040151 |
| KLHL21 478 AP      | -2.05142 | 1.65E-08 | 6.03E-16 | 0.449776 | 0.040226 |
| ICOSLG 60809 RI    | -2.05116 | 2.71E-05 | 1.17E-09 | 0.626557 | 0.040251 |
| CEP70 66998 AT     | 2.051061 | 2741.898 | 1.421348 | 5289349  | 0.040261 |
| C14orf159 28860 ES | 2.050664 | 205.8824 | 1.265698 | 33489.49 | 0.0403   |
| ZNF385A 22176 AP   | -2.05025 | 0.00732  | 6.65E-05 | 0.805314 | 0.040341 |
| TPM1 30987 AD      | -2.05013 | 0.060398 | 0.004127 | 0.883872 | 0.040352 |
| PLA2G6 62210 ES    | -2.04804 | 5.03E-06 | 4.28E-11 | 0.591764 | 0.040556 |
| GJA9 1857 AT       | 2.047531 | 224.999  | 1.260654 | 40157.35 | 0.040606 |
| ZNF280B 61274 RI   | -2.04744 | 0.005559 | 3.86E-05 | 0.801049 | 0.040615 |
| DNAJC28 60425 AD   | 2.047319 | 9.241979 | 1.09953  | 77.68245 | 0.040627 |
| KIAA0226L 25828 AP | 2.046809 | 16.63168 | 1.126688 | 245.5097 | 0.040677 |
| GIPC1 47980 ES     | 2.046538 | 126856.9 | 1.643935 | 9.79E+09 | 0.040703 |
| TFPT 51789 AA      | -2.04558 | 2.20E-14 | 1.80E-27 | 0.268124 | 0.040797 |
| SYT9 14192 AT      | -2.04555 | 0.03568  | 0.001464 | 0.869823 | 0.0408   |
| IYD 78144 ES       | 2.044718 | 47857.28 | 1.563091 | 1.47E+09 | 0.040883 |
| ZNF235 50305 AT    | 2.044615 | 2728.758 | 1.387575 | 5366286  | 0.040893 |
| GIT2 24381 ES      | -2.04458 | 0.015705 | 0.000293 | 0.84206  | 0.040896 |
| SIDT2 18892 ES     | 2.044046 | 11215.86 | 1.467544 | 85718350 | 0.040949 |
| CDC42SE1 7556 ES   | -2.04403 | 0.000714 | 6.86E-07 | 0.742323 | 0.040951 |
| BBS9 79220 ES      | -2.04381 | 2.69E-11 | 1.96E-21 | 0.368424 | 0.040972 |
| WDR52 66200 AT     | -2.04303 | 0.007163 | 6.27E-05 | 0.818072 | 0.04105  |
| WDR52 66199 AT     | 2.043025 | 139.6185 | 1.222375 | 15947.09 | 0.04105  |
| ANKRD17 69480 AP   | 2.042672 | 41.9466  | 1.16333  | 1512.483 | 0.041085 |
| ZBTB44 19492 RI    | 2.04258  | 217781.5 | 1.644014 | 2.88E+10 | 0.041094 |
| MIB2 192 ES        | -2.04246 | 1.08E-18 | 6.24E-36 | 0.188082 | 0.041106 |
| LRRC2 64455 AP     | -2.04215 | 0.049194 | 0.002732 | 0.885839 | 0.041136 |
| TCEA1 83859 ES     | -2.04215 | 1.49E-10 | 5.50E-20 | 0.402243 | 0.041137 |
| HPS1 12762 ES      | 2.041885 | 562579.7 | 1.700975 | 1.86E+11 | 0.041163 |

|                   |          |          |          |          |          |
|-------------------|----------|----------|----------|----------|----------|
| C11orf48 16388 RI | -2.04166 | 0.005459 | 3.67E-05 | 0.811803 | 0.041185 |
| PLEC 85512 AP     | -2.04114 | 0.00016  | 3.64E-08 | 0.706435 | 0.041236 |
| ALKBH6 49326 RI   | 2.040446 | 21.3427  | 1.128315 | 403.7091 | 0.041306 |
| FOXRED1 19378 ES  | 2.040237 | 18336082 | 1.930965 | 1.74E+14 | 0.041327 |
| PARL 67810 AD     | -2.04003 | 2.15E-05 | 7.02E-10 | 0.655803 | 0.041347 |
| IDH1 57208 AP     | 2.039463 | 1161607  | 1.723533 | 7.83E+11 | 0.041404 |
| IL4R 35690 ES     | -2.03933 | 0.00096  | 1.21E-06 | 0.763059 | 0.041418 |
| ACAD8 19559 ES    | 2.038852 | 2994.379 | 1.363033 | 6578205  | 0.041465 |
| PNPLA6 47109 AP   | 2.038755 | 2377.854 | 1.350451 | 4186893  | 0.041474 |
| IRF3 51011 ES     | -2.03864 | 0.021088 | 0.000516 | 0.861627 | 0.041486 |
| ARHGEF1 50100 ES  | -2.03805 | 0.000185 | 4.77E-08 | 0.719461 | 0.041545 |
| EPN2 39700 ES     | 2.037712 | 61475.14 | 1.52304  | 2.48E+09 | 0.041579 |
| TRMT61B 53080 ES  | -2.0376  | 7.29E-07 | 9.11E-13 | 0.583688 | 0.04159  |
| PRMT1 51044 ES    | 2.037514 | 13527.97 | 1.436278 | 1.27E+08 | 0.041599 |
| MLLT4 78458 AA    | 2.037228 | 139.3908 | 1.205932 | 16111.86 | 0.041627 |
| FICD 24213 AA     | 2.03681  | 509.7199 | 1.265157 | 205361.3 | 0.041669 |
| LRRC2 64456 AP    | 2.036231 | 20.33671 | 1.119441 | 369.4538 | 0.041727 |
| ERCC1 50447 AD    | -2.03622 | 0.003874 | 1.85E-05 | 0.812225 | 0.041728 |
| DNAH9 39293 AT    | 2.035803 | 50.53443 | 1.157345 | 2206.54  | 0.04177  |
| ARL16 44152 AD    | -2.03564 | 2.73E-06 | 1.20E-11 | 0.621084 | 0.041786 |
| DUSP15 58908 AT   | -2.03464 | 2.43E-06 | 9.49E-12 | 0.622196 | 0.041887 |
| UCKL1 60177 AP    | -2.03441 | 2.03E-06 | 6.66E-12 | 0.619003 | 0.04191  |
| CHD7 83952 ES     | -2.03414 | 7.04E-05 | 7.03E-09 | 0.705656 | 0.041938 |
| MLLT4 78446 AT    | -2.03386 | 8.95E-11 | 1.86E-20 | 0.431443 | 0.041966 |
| SUPT20H 25661 ES  | 2.033682 | 330.3412 | 1.23398  | 88433.59 | 0.041984 |
| RPLP0 24736 AD    | -2.03356 | 0.010656 | 0.000134 | 0.848438 | 0.041996 |
| PTK2B 83150 AP    | -2.03341 | 0.06864  | 0.00519  | 0.907769 | 0.042011 |
| TYMP 96247 ES     | -2.03322 | 0.003517 | 1.52E-05 | 0.815804 | 0.04203  |
| AKAP8L 48081 RI   | 2.033004 | 1980555  | 1.68355  | 2.33E+12 | 0.042052 |
| RTN4 53592 ES     | 2.032273 | 7.559136 | 1.074623 | 53.17262 | 0.042126 |
| CIC 50146 AA      | 2.032179 | 75540.57 | 1.490565 | 3.83E+09 | 0.042135 |
| STRADA 42976 ES   | -2.03138 | 0.032296 | 0.001177 | 0.886317 | 0.042217 |
| RREB1 75249 AP    | 2.03038  | 7.34E+08 | 2.029862 | 2.65E+17 | 0.042318 |
| C3orf18 65065 AD  | 2.030217 | 1.24E+09 | 2.063685 | 7.43E+17 | 0.042334 |
| GEMIN7 50399 AD   | 2.029857 | 22.0775  | 1.112438 | 438.1514 | 0.042371 |
| ELMO2 59684 ES    | -2.02898 | 0.010376 | 0.000126 | 0.856085 | 0.04246  |
| MBD1 45507 AA     | -2.02869 | 0.00243  | 7.24E-06 | 0.815512 | 0.04249  |
| DHPS 47837 AD     | -2.02805 | 2.69E-14 | 2.07E-27 | 0.350309 | 0.042556 |
| CD2BP2 36096 AP   | -2.02685 | 5.79E-07 | 5.38E-13 | 0.622547 | 0.042678 |
| ACACB 24283 ES    | 2.026444 | 86.01344 | 1.157353 | 6392.444 | 0.042719 |
| MEN1 16706 AD     | -2.02603 | 0.040886 | 0.001855 | 0.900996 | 0.042761 |
| OAZ3 7653 AP      | -2.0253  | 2.45E-06 | 9.08E-12 | 0.659148 | 0.042837 |
| PHF11 25893 ES    | 2.024909 | 93664055 | 1.80166  | 4.87E+15 | 0.042877 |
| NEK1 71147 ES     | 2.024735 | 24.15555 | 1.107242 | 526.9765 | 0.042895 |
| GGCT 79138 ES     | -2.02462 | 6.64E-05 | 5.99E-09 | 0.735489 | 0.042906 |
| RANBP3 46996 ES   | 2.02401  | 17.26751 | 1.094333 | 272.4645 | 0.042969 |
| TULP3 19733 RI    | -2.02395 | 1.57E-10 | 5.02E-20 | 0.489806 | 0.042975 |
| C8orf31 85393 ES  | -2.02367 | 0.000471 | 2.83E-07 | 0.785745 | 0.043004 |
| LAT2 80064 AT     | -2.02354 | 0.004438 | 2.34E-05 | 0.843486 | 0.043017 |
| LAT2 80065 AT     | 2.023542 | 225.3026 | 1.185556 | 42816.43 | 0.043017 |
| SHC4 30508 AP     | -2.02334 | 0.027544 | 0.000849 | 0.893594 | 0.043038 |
| GPR137 16617 AP   | 2.023202 | 1858.939 | 1.265277 | 2731145  | 0.043052 |
| MPV17 52966 AT    | -2.02317 | 4.76E-16 | 6.81E-31 | 0.332133 | 0.043056 |
| MUS81 16927 AP    | -2.02259 | 2.01E-05 | 5.63E-10 | 0.715398 | 0.043116 |
| SH2B1 35878 AD    | -2.02258 | 1.18E-06 | 2.13E-12 | 0.655399 | 0.043117 |
| MUS81 16926 AP    | 2.022468 | 49820.53 | 1.396926 | 1.78E+09 | 0.043128 |
| RAB40C 32913 ES   | 2.022008 | 32.14427 | 1.112357 | 928.8867 | 0.043176 |
| FAM179B 27390 ES  | -2.02172 | 6.53E-08 | 7.07E-15 | 0.603264 | 0.043205 |

|                    |          |          |          |          |          |
|--------------------|----------|----------|----------|----------|----------|
| ARL6IP4 25029 AD   | -2.02147 | 0.00025  | 8.07E-08 | 0.776999 | 0.043231 |
| APOL3 61991 RI     | 2.020829 | 33.49155 | 1.11155  | 1009.117 | 0.043298 |
| MRPL35 54419 RI    | 2.020427 | 17506.58 | 1.339619 | 2.29E+08 | 0.043339 |
| ARHGEF10 82561 AA  | -2.01997 | 0.001177 | 1.69E-06 | 0.81845  | 0.043387 |
| LFNG 78616 AP      | -2.01983 | 0.000374 | 1.77E-07 | 0.791461 | 0.043401 |
| MOV10 4226 AA      | 2.019795 | 29.7566  | 1.105736 | 800.7839 | 0.043405 |
| SETMAR 63000 ES    | -2.01942 | 0.048416 | 0.002563 | 0.914703 | 0.043443 |
| SUOX 22342 ES      | 2.01914  | 16.95544 | 1.086496 | 264.6002 | 0.043473 |
| APTX 86070 AP      | 2.019027 | 2285.028 | 1.253887 | 4164131  | 0.043484 |
| COX20 10474 ES     | 2.01884  | 3215.929 | 1.265567 | 8171994  | 0.043504 |
| MANBAL 59344 ES    | -2.01868 | 0.000276 | 9.70E-08 | 0.787945 | 0.04352  |
| SULF2 59728 ES     | 2.018646 | 209.8256 | 1.168145 | 37689.49 | 0.043524 |
| FKTN 87133 RI      | -2.01811 | 2.42E-14 | 1.44E-27 | 0.405187 | 0.043579 |
| ZSWIM7 39398 ES    | 2.017842 | 3412.025 | 1.262812 | 9219041  | 0.043608 |
| MAP2K3 39818 ES    | -2.01747 | 7.26E-07 | 7.89E-13 | 0.668358 | 0.043646 |
| RAD51D 40267 ES    | -2.01743 | 0.040097 | 0.001762 | 0.912448 | 0.04365  |
| RNH1 13662 AP      | 2.01648  | 186.9815 | 1.157901 | 30194.34 | 0.04375  |
| ETV7 75974 ES      | -2.01625 | 0.007617 | 6.65E-05 | 0.872703 | 0.043774 |
| ENOSF1 44476 AD    | 2.016094 | 27.94699 | 1.097154 | 711.8733 | 0.04379  |
| MFF 57809 ES       | -2.016   | 3.11E-07 | 1.47E-13 | 0.659396 | 0.0438   |
| PLEKHA5 20644 AP   | -2.01568 | 0.000207 | 5.42E-08 | 0.790979 | 0.043833 |
| IFFO1 19883 ES     | -2.0152  | 0.003854 | 1.73E-05 | 0.858679 | 0.043884 |
| TGFBR1 87053 ES    | -2.0148  | 0.001667 | 3.31E-06 | 0.840201 | 0.043925 |
| VAMP7 90683 ES     | -2.01472 | 2.48E-06 | 8.72E-12 | 0.704105 | 0.043934 |
| RUVBL2 50865 ES    | -2.01448 | 0.012633 | 0.00018  | 0.888432 | 0.043959 |
| FAM3A 90630 AA     | -2.01429 | 1.07E-07 | 1.78E-14 | 0.648683 | 0.043979 |
| ZNF180 50335 ES    | -2.01393 | 0.036282 | 0.001439 | 0.914971 | 0.044017 |
| PDHA1 88629 AP     | -2.01345 | 1.53E-05 | 3.16E-10 | 0.744934 | 0.044067 |
| ITSN1 60468 AT     | -2.01335 | 9.86E-08 | 1.49E-14 | 0.651961 | 0.044078 |
| NBPF10 4448 ES     | -2.01313 | 0.063704 | 0.004364 | 0.929868 | 0.044101 |
| SLC47A1 39745 ES   | -2.01301 | 1.51E-05 | 3.06E-10 | 0.746394 | 0.044113 |
| PIK3R1 72291 AP    | -2.01235 | 0.105071 | 0.011707 | 0.943035 | 0.044183 |
| SEC22A 66465 AA    | -2.01231 | 3.86E-16 | 3.74E-31 | 0.397215 | 0.044187 |
| PTK2B 83149 AP     | 2.012065 | 12.61966 | 1.067852 | 149.1367 | 0.044213 |
| JMJD7 30119 AA     | 2.011975 | 39.44707 | 1.09966  | 1415.048 | 0.044223 |
| SEC24C 12178 ES    | -2.01162 | 3.11E-06 | 1.34E-11 | 0.722067 | 0.04426  |
| COL8A1 65802 ES    | 2.011107 | 80.96232 | 1.118221 | 5861.896 | 0.044314 |
| GEMIN2 27354 ES    | -2.01063 | 6.13E-05 | 4.79E-09 | 0.783148 | 0.044365 |
| PCDHA2 73769 AT    | 2.010319 | 16.45305 | 1.072666 | 252.3643 | 0.044397 |
| SF3A1 61729 ES     | 2.009824 | 1.01E+19 | 2.961528 | 3.48E+37 | 0.04445  |
| RWDD3 3828 ES      | -2.00948 | 0.010783 | 0.00013  | 0.894389 | 0.044486 |
| TMEM234 1575 ES    | 2.009124 | 831.1905 | 1.178802 | 586084.3 | 0.044524 |
| FOXP1 65601 AT     | -2.00906 | 2.05E-12 | 8.09E-24 | 0.518058 | 0.044531 |
| SNRNP200 54521 ES  | 2.006531 | 14430.06 | 1.248897 | 1.67E+08 | 0.0448   |
| TNFRSF10C 83064 AT | -2.00639 | 0.000723 | 6.17E-07 | 0.84589  | 0.044814 |
| SLC34A2 68967 AP   | -2.0051  | 0.002682 | 8.22E-06 | 0.875214 | 0.044953 |
| ANKRD10 26270 AT   | -2.00506 | 0.00069  | 5.61E-07 | 0.848989 | 0.044957 |
| ANKRD10 26271 AT   | 2.005046 | 1449.484 | 1.177817 | 1783811  | 0.044958 |
| ATPIF1 1381 RI     | 2.004721 | 1116.065 | 1.169611 | 1064969  | 0.044993 |
| MINA 65746 AD      | 2.004534 | 198.3109 | 1.124813 | 34963.34 | 0.045013 |
| TTLL4 57561 AA     | -2.00329 | 6.14E-06 | 4.89E-11 | 0.771404 | 0.045146 |
| NECAB3 59008 AA    | -2.00319 | 7.87E-06 | 7.98E-11 | 0.776    | 0.045157 |
| HNRNPK 86708 AP    | -2.00308 | 2.59E-05 | 8.39E-10 | 0.796632 | 0.045169 |
| HNRNPK 86709 AP    | 2.003077 | 38682.37 | 1.255278 | 1.19E+09 | 0.045169 |
| GSDMD 85422 AP     | 2.002482 | 35008.65 | 1.248776 | 9.81E+08 | 0.045233 |
| MRPL51 19868 AP    | 2.00232  | 1.76E+11 | 1.729234 | 1.78E+22 | 0.04525  |
| MRPL51 19869 AP    | -2.00228 | 5.70E-12 | 5.62E-23 | 0.57858  | 0.045255 |
| TBC1D3 40560 AP    | 2.001664 | 46017.19 | 1.250666 | 1.69E+09 | 0.045321 |

|                   |          |          |          |          |          |
|-------------------|----------|----------|----------|----------|----------|
| FARP1 26163 AP    | 2.001508 | 124.6613 | 1.10535  | 14059.29 | 0.045338 |
| POLM 79464 AD     | -2.00099 | 0.008808 | 8.55E-05 | 0.907526 | 0.045393 |
| CBWD2 55055 ES    | 2.000755 | 657.2802 | 1.141427 | 378488.9 | 0.045419 |
| ZNF208 48802 ES   | 2.000681 | 28.75031 | 1.070743 | 771.9689 | 0.045427 |
| LEKR1 67370 AT    | 1.999864 | 32.73474 | 1.072079 | 999.5191 | 0.045515 |
| FHL2 54823 AT     | -1.99985 | 9.34E-07 | 1.15E-12 | 0.758117 | 0.045516 |
| TPGS2 45266 AT    | 1.999716 | 2.45E+08 | 1.468167 | 4.1E+16  | 0.045531 |
| AGO3 1740 AT      | 1.998483 | 545.243  | 1.129134 | 263290.1 | 0.045664 |
| FBXO10 86409 AT   | -1.99848 | 3.52E-07 | 1.65E-13 | 0.750969 | 0.045665 |
| FBXO10 86408 AT   | 1.998444 | 2843021  | 1.331271 | 6.07E+12 | 0.045669 |
| ZNF177 47304 AA   | -1.99797 | 0.016695 | 0.000301 | 0.925102 | 0.04572  |
| SNAPC3 85915 RI   | -1.99756 | 7.94E-09 | 8.96E-17 | 0.703985 | 0.045765 |
| PDCD5 48877 AP    | -1.99739 | 2.02E-05 | 4.99E-10 | 0.816632 | 0.045783 |
| PDCD5 48878 AP    | 1.997382 | 49557.14 | 1.224493 | 2.01E+09 | 0.045784 |
| DNAJC14 22262 AP  | -1.99711 | 0.009278 | 9.39E-05 | 0.916639 | 0.045814 |
| DNAJC14 22260 AP  | 1.996853 | 107.7252 | 1.090294 | 10643.65 | 0.045841 |
| CNOT2 23366 AT    | 1.996102 | 8765.748 | 1.178641 | 65192347 | 0.045923 |
| CITED1 89454 ES   | -1.99592 | 0.010253 | 0.000114 | 0.920801 | 0.045943 |
| EFCAB13 99855 ES  | 1.995781 | 30.00085 | 1.062941 | 846.7551 | 0.045958 |
| PSPH 79781 AA     | 1.995435 | 541.2363 | 1.118379 | 261929.7 | 0.045995 |
| MED14 98321 ES    | 1.995406 | 7.43E+11 | 1.624995 | 3.40E+23 | 0.045999 |
| GBA 8041 AP       | 1.99501  | 109.0622 | 1.085915 | 10953.49 | 0.046042 |
| GBA 8040 AP       | -1.995   | 0.009169 | 9.13E-05 | 0.920913 | 0.046043 |
| BACH1 60323 AP    | -1.99479 | 0.036008 | 0.001374 | 0.943625 | 0.046066 |
| MAGOHB 20472 ES   | 1.994785 | 762.5374 | 1.122826 | 517857.2 | 0.046066 |
| SGSM2 38394 ES    | 1.994148 | 188.0364 | 1.093919 | 32322.05 | 0.046136 |
| SFMBT2 10709 AT   | 1.994125 | 4957531  | 1.302255 | 1.89E+13 | 0.046138 |
| VWA9 31215 ES     | 1.993745 | 69.6     | 1.074533 | 4508.152 | 0.04618  |
| SARDH 88080 AT    | 1.99364  | 38.38156 | 1.063551 | 1385.119 | 0.046191 |
| HNRNPF 11322 AP   | 1.993563 | 39945.92 | 1.195506 | 1.33E+09 | 0.0462   |
| TMEM8B 86319 AP   | 1.99347  | 1703.46  | 1.133214 | 2560660  | 0.04621  |
| RANGRF 39168 RI   | 1.992749 | 13261.48 | 1.169031 | 1.5E+08  | 0.046289 |
| UBAP1 86154 ES    | -1.99271 | 0.122416 | 0.015512 | 0.966071 | 0.046293 |
| POC1A 65180 ES    | -1.9927  | 0.007546 | 6.17E-05 | 0.922854 | 0.046294 |
| DNAH7 56630 AT    | 1.992581 | 238.2615 | 1.093732 | 51903.55 | 0.046307 |
| ELOVL5 76490 AP   | -1.99252 | 1.62E-05 | 3.16E-10 | 0.835111 | 0.046314 |
| NCOR1 39419 AD    | -1.99215 | 7.34E-08 | 7.03E-15 | 0.766902 | 0.046355 |
| PTPN18 55344 ES   | 1.992017 | 102.0338 | 1.077264 | 9664.212 | 0.046369 |
| MACF1 1881 ES     | -1.99086 | 0.003128 | 1.07E-05 | 0.914373 | 0.046496 |
| FAM213B 293 AA    | 1.990601 | 7258.637 | 1.146625 | 45950333 | 0.046525 |
| NDUFB8 12824 AT   | -1.99009 | 1.89E-15 | 5.97E-30 | 0.598618 | 0.046582 |
| IDUA 68443 ES     | -1.99008 | 3.44E-09 | 1.59E-17 | 0.744602 | 0.046582 |
| NDUFA7 47216 AT   | 1.989993 | 158.442  | 1.079434 | 23256.5  | 0.046592 |
| USP19 64839 AD    | -1.98998 | 1.18E-06 | 1.71E-12 | 0.813933 | 0.046593 |
| BCAT2 50811 AP    | 1.989797 | 5605.922 | 1.138159 | 27611581 | 0.046613 |
| HKR1 49495 ES     | -1.98976 | 0.063313 | 0.004178 | 0.959519 | 0.046618 |
| BCAT2 50810 AP    | -1.98962 | 0.000178 | 3.62E-08 | 0.87929  | 0.046633 |
| RBBP4 1626 ES     | -1.98953 | 0.198207 | 0.040243 | 0.976232 | 0.046642 |
| PRICKLE4 76141 AA | -1.98904 | 0.076138 | 0.006019 | 0.963054 | 0.046697 |
| PDHB 65453 AD     | 1.988848 | 5712.499 | 1.133863 | 28780053 | 0.046718 |
| NFE2L1 42158 AP   | 1.987923 | 84.6869  | 1.064422 | 6737.808 | 0.04682  |
| USMG5 13004 ES    | 1.987806 | 2.13E+12 | 1.488281 | 3.05E+24 | 0.046833 |
| ATXN3 28978 ES    | -1.98778 | 1.03E-05 | 1.26E-10 | 0.851605 | 0.046836 |
| THTPA 26760 RI    | 1.987719 | 1757.421 | 1.109963 | 2782552  | 0.046843 |
| PGS1 43878 ES     | -1.98764 | 1.03E-10 | 1.45E-20 | 0.725954 | 0.046851 |
| SRP54 27180 ES    | 1.987236 | 8.89E+20 | 1.938652 | 4.08E+41 | 0.046896 |
| SFTA3 27254 ES    | 1.987234 | 47.32087 | 1.054352 | 2123.829 | 0.046897 |
| KMT2C 82413 AP    | -1.98696 | 0.022537 | 0.000535 | 0.949786 | 0.046927 |

|                    |          |          |          |          |          |
|--------------------|----------|----------|----------|----------|----------|
| BCCIP 13433 AT     | -1.98686 | 0.000683 | 5.15E-07 | 0.906044 | 0.046938 |
| KMT2C 82412 AP     | 1.986853 | 44.35784 | 1.052662 | 1869.183 | 0.046939 |
| TMEM108 66830 AA   | 1.986168 | 70.42158 | 1.057736 | 4688.502 | 0.047015 |
| PCDH11X 89581 AT   | -1.98591 | 0.014596 | 0.000225 | 0.946272 | 0.047043 |
| ZNF227 50299 AA    | -1.9855  | 0.001195 | 1.56E-06 | 0.917098 | 0.047089 |
| RIC8A 13587 AA     | 1.984911 | 4.58E+10 | 1.361411 | 1.54E+21 | 0.047154 |
| EYA3 1370 ES       | -1.98442 | 0.000872 | 8.28E-07 | 0.91684  | 0.047209 |
| STEAP4 80362 AT    | 1.98379  | 85.1564  | 1.054829 | 6874.68  | 0.047279 |
| STEAP4 80361 AT    | -1.98379 | 0.011743 | 0.000145 | 0.948028 | 0.04728  |
| STK33 14240 AP     | -1.98362 | 3.69E-05 | 1.54E-09 | 0.885363 | 0.047298 |
| DNAJA4 32073 AT    | -1.98349 | 1.08E-10 | 1.54E-20 | 0.761766 | 0.047313 |
| GGA1 62120 AP      | 1.983054 | 1055.952 | 1.08444  | 1028212  | 0.047361 |
| CYP51A1 80416 AP   | 1.983049 | 50.56249 | 1.046729 | 2442.434 | 0.047362 |
| SYS1 59527 AT      | -1.98298 | 1.37E-18 | 3.04E-36 | 0.620359 | 0.047369 |
| GGA1 62121 AP      | -1.98266 | 0.000948 | 9.73E-07 | 0.923411 | 0.047406 |
| NAP1L1 23493 ES    | -1.9826  | 0.067536 | 0.004704 | 0.969695 | 0.047412 |
| PACRGL 68908 ES    | 1.982339 | 52955.33 | 1.130627 | 2.48E+09 | 0.047441 |
| SNAP23 30166 AP    | -1.9823  | 4.75E-11 | 2.95E-21 | 0.765029 | 0.047446 |
| HYI 2182 AT        | -1.98224 | 1.33E-05 | 2.01E-10 | 0.881458 | 0.047452 |
| ZNF567 49414 AP    | 1.981451 | 6.729762 | 1.02089  | 44.36295 | 0.047541 |
| FARP1 26162 AP     | -1.98122 | 0.008273 | 7.21E-05 | 0.949856 | 0.047566 |
| TRIM9 27503 AT     | -1.98116 | 0.038762 | 0.001556 | 0.965827 | 0.047574 |
| TSGA10 54665 AA    | -1.98091 | 0.035436 | 0.001301 | 0.9653   | 0.047601 |
| ZNF175 51359 AT    | -1.9804  | 0.002066 | 4.55E-06 | 0.938202 | 0.047659 |
| REPIN1 82247 ES    | 1.979669 | 17.15127 | 1.028693 | 285.9609 | 0.047741 |
| TBC1D9B 74991 ES   | 1.979348 | 1.41E+08 | 1.201766 | 1.66E+16 | 0.047777 |
| MLH1 63953 AD      | 1.978797 | 170.3865 | 1.050117 | 27646.01 | 0.047839 |
| STRA13 44263 AD    | 1.978661 | 3.74E+08 | 1.205057 | 1.16E+17 | 0.047854 |
| C14orf159 28870 ES | -1.97865 | 0.002751 | 8.00E-06 | 0.945839 | 0.047855 |
| MAPK10 69824 AA    | 1.977747 | 120.2226 | 1.044005 | 13844.25 | 0.047957 |
| DNAH7 56629 AT     | -1.97739 | 0.004297 | 1.94E-05 | 0.953117 | 0.047998 |
| CKLF 36731 ES      | -1.9771  | 8.37E-09 | 8.23E-17 | 0.8511   | 0.04803  |
| METTL23 43648 AD   | 1.975998 | 12.87082 | 1.020948 | 162.259  | 0.048155 |
| TGFBR3 3739 AP     | 1.975463 | 16.64992 | 1.022311 | 271.1697 | 0.048216 |
| OS9 22697 AA       | 1.974942 | 276820.4 | 1.099696 | 6.97E+10 | 0.048275 |
| ZNF669 10513 AD    | 1.974803 | 56.88817 | 1.030831 | 3139.472 | 0.048291 |
| EIF3M 14855 ES     | -1.97434 | 0.00223  | 5.20E-06 | 0.956528 | 0.048344 |
| STXBP6 27043 AD    | 1.972921 | 559.0642 | 1.042421 | 299833.4 | 0.048505 |
| SZT2 2175 AT       | 1.972176 | 1.7E+08  | 1.124526 | 2.58E+16 | 0.04859  |
| CNTN6 62939 AT     | -1.97157 | 2.41E-05 | 6.16E-10 | 0.939297 | 0.048658 |
| RFC4 68062 ES      | -1.97089 | 2.59E-11 | 7.70E-22 | 0.873649 | 0.048737 |
| CADM1 18849 ES     | -1.97053 | 0.001042 | 1.13E-06 | 0.963861 | 0.048778 |
| NAT16 81045 AT     | 1.970348 | 47.13835 | 1.020515 | 2177.357 | 0.048798 |
| EXOSC10 645 RI     | 1.970177 | 90.80118 | 1.023647 | 8054.392 | 0.048818 |
| EGLN3 27148 AT     | 1.969972 | 3982.975 | 1.043014 | 15209848 | 0.048842 |
| CNTRL 87411 AT     | -1.96972 | 2.40E-08 | 6.26E-16 | 0.916731 | 0.04887  |
| EGLN3 27149 AT     | -1.96963 | 0.000251 | 6.58E-08 | 0.960156 | 0.048881 |
| GFM2 72503 ES      | -1.96952 | 5.16E-05 | 2.79E-09 | 0.953221 | 0.048893 |
| MTFR1L 1197 AP     | 1.969514 | 166326.5 | 1.060022 | 2.61E+10 | 0.048894 |
| PPFIA3 50895 RI    | -1.96914 | 0.006323 | 4.09E-05 | 0.976678 | 0.048937 |
| GMEB2 60137 AP     | -1.96908 | 0.059049 | 0.003533 | 0.986993 | 0.048944 |
| ZNF789 80652 ES    | 1.968763 | 37.15284 | 1.016288 | 1358.211 | 0.04898  |
| SYVN1 16795 AA     | 1.968346 | 675.2789 | 1.028133 | 443523.9 | 0.049028 |
| SUV420H1 17300 ES  | -1.96808 | 7.10E-07 | 5.34E-13 | 0.943316 | 0.049059 |
| ZDHHC4 78749 ES    | 1.967413 | 10.14268 | 1.008811 | 101.9754 | 0.049136 |
| ERBB2IP 72267 ES   | -1.96669 | 0.017844 | 0.000323 | 0.98591  | 0.049195 |
| LARGE 61939 AP     | -1.96685 | 0.127566 | 0.016391 | 0.992813 | 0.0492   |
| PHLN1 21222 ES     | -1.96682 | 0.036522 | 0.001349 | 0.988535 | 0.049204 |

|                   |          |          |          |          |          |
|-------------------|----------|----------|----------|----------|----------|
| U2AF1 60778 ES    | 1.966403 | 1079.03  | 1.023131 | 1137983  | 0.049252 |
| AKAP6 27135 AT    | 1.966381 | 4185.793 | 1.027588 | 17050479 | 0.049255 |
| AKAP6 27136 AT    | -1.96636 | 0.000239 | 5.86E-08 | 0.973244 | 0.049257 |
| CAPN10 58269 AT   | -1.96663 | 2.53E-08 | 6.77E-16 | 0.945191 | 0.049264 |
| C1D 53822 ES      | 1.96551  | 557.398  | 1.018001 | 305198.7 | 0.049355 |
| LIPA 12487 AD     | 1.965277 | 2747.952 | 1.021636 | 7391320  | 0.049382 |
| COPZ1 22171 ES    | -1.96523 | 0.016792 | 0.000285 | 0.989118 | 0.049388 |
| FAM213A 12362 AP  | -1.96457 | 0.010911 | 0.00012  | 0.989471 | 0.049464 |
| EPN1 52137 AP     | 1.963492 | 962.5072 | 1.012419 | 915055.9 | 0.049589 |
| EPN1 52136 AP     | -1.96349 | 0.001039 | 1.09E-06 | 0.987748 | 0.04959  |
| SHC4 30507 AP     | 1.963052 | 33.0346  | 1.005518 | 1085.296 | 0.04964  |
| ZNF446 52471 AD   | 1.962603 | 230.7578 | 1.007343 | 52861    | 0.049692 |
| ZMAT5 61664 ES    | -1.96255 | 0.000629 | 4.00E-07 | 0.990325 | 0.049698 |
| ENOSF1 44465 ES   | -1.9613  | 8.97E-07 | 8.12E-13 | 0.990572 | 0.049844 |
| OPTN 215727 ES    | 1.961281 | 9.85E+17 | 1.028222 | 9.44E+35 | 0.049846 |
| EFCAB13 42070 AT  | 1.961184 | 79.36628 | 1.002724 | 6281.893 | 0.049858 |
| C11orf74 15440 ES | 1.960911 | 50452.02 | 1.005241 | 2.53E+09 | 0.049889 |
| MRPL36 71494 AD   | 1.960909 | 3405.555 | 1.003926 | 11552455 | 0.04989  |
| UBXN11 101231 ES  | 1.96081  | 188.4736 | 1.002262 | 35442.12 | 0.049901 |
| SERPINB6 75146 AP | -1.96062 | 0.000171 | 2.93E-08 | 0.997081 | 0.049923 |
| COL14A1 85018 AT  | -1.96034 | 0.001153 | 1.33E-06 | 0.998713 | 0.049956 |
| UBXN11 1254 ES    | 1.960061 | 136.3873 | 1.000243 | 18596.96 | 0.049989 |
