# Supplementary material for: Alternative splicing events implicated in carcinogenesis and prognosis of thyroid gland cancer
Source: PubMed Central journal article supplement (PMC7921437; doi:10.1038/s41598-021-84403-6), 2021-03-01
Supplement: 41598_2021_84403_MOESM3_ESM.pdf [file 41598_2021_84403_MOESM3_ESM.pdf]

| SF      | AS                | cor          | pvalue   | Regulation |
|---------|-------------------|--------------|----------|------------|
| HSPB1   | CABIN1-61386-AP   | 0.603480679  | 4.88E-50 | positive   |
| HSPB1   | RARA-40856-AP     | 0.672332229  | 7.15E-66 | positive   |
| ZC3H11A | KIAA2013-694-AT   | -0.6003872   | 2.05E-49 | negative   |
| NOSIP   | CABIN1-61386-AP   | 0.650386806  | 2.24E-60 | positive   |
| NOSIP   | CREBZF-18139-RI   | -0.612260621 | 7.67E-52 | negative   |
| NOSIP   | HAS3-37253-AT     | -0.602187974 | 8.90E-50 | negative   |
| NOSIP   | HAS3-37254-AT     | 0.602190695  | 8.89E-50 | positive   |
| NOSIP   | RARA-40856-AP     | 0.697930364  | 6.51E-73 | positive   |
| SNRPB   | CABIN1-61386-AP   | 0.636095182  | 4.90E-57 | positive   |
| SNRPF   | RARA-40856-AP     | 0.639168339  | 9.70E-58 | positive   |
| SNRPF   | EMP1-20539-ES     | -0.691481848 | 4.54E-71 | negative   |
| WDR83   | RARA-40856-AP     | 0.638101289  | 1.71E-57 | positive   |
| ZNF346  | PCNA-58649-AP     | -0.620666092 | 1.27E-53 | negative   |
| ZNF346  | PCNA-58648-AP     | 0.620662181  | 1.27E-53 | positive   |
| ZNF346  | LGALS3-27617-AT   | -0.610771929 | 1.56E-51 | negative   |
| ZNF346  | IL1RAP-68106-AT   | 0.703842116  | 1.20E-74 | positive   |
| THOC6   | CABIN1-61386-AP   | 0.611130818  | 1.32E-51 | positive   |
| THOC6   | RARA-40856-AP     | 0.612396257  | 7.18E-52 | positive   |
| FAM50A  | NUPL2-78961-AT    | 0.615747358  | 1.42E-52 | positive   |
| FAM50A  | NUPL2-78960-AT    | -0.615750583 | 1.42E-52 | negative   |
| FAM50A  | RARA-40856-AP     | 0.648784182  | 5.41E-60 | positive   |
| CLK1    | DYNLT1-78273-AP   | 0.637690348  | 2.12E-57 | positive   |
| CLK1    | DYNLT1-78274-AP   | -0.637690348 | 2.12E-57 | negative   |
| CLK1    | BCAT2-50816-ES    | 0.664077378  | 9.47E-64 | positive   |
| CLK1    | EPOR-47693-ES     | 0.612906576  | 5.62E-52 | positive   |
| CLK1    | EXOSC10-645-RI    | 0.706558302  | 1.86E-75 | positive   |
| ACIN1   | DAPK2-31076-ES    | 0.610592631  | 1.70E-51 | positive   |
| ACIN1   | NDUFB8-12824-AT   | -0.664939932 | 5.72E-64 | negative   |
| ACIN1   | EXOSC10-645-RI    | 0.603441555  | 4.97E-50 | positive   |
| TIA1    | DYNLT1-78273-AP   | 0.699178655  | 2.83E-73 | positive   |
| TIA1    | DYNLT1-78274-AP   | -0.699178655 | 2.83E-73 | negative   |
| TIA1    | DAPK2-31076-ES    | 0.66816928   | 8.57E-65 | positive   |
| TIA1    | BCAT2-50816-ES    | 0.657850288  | 3.41E-62 | positive   |
| TIA1    | EPOR-47693-ES     | 0.620028489  | 1.74E-53 | positive   |
| TIA1    | NDUFB8-12824-AT   | -0.615923506 | 1.30E-52 | negative   |
| TIA1    | EXOSC10-645-RI    | 0.736492672  | 4.71E-85 | positive   |
| FUBP1   | C2orf68-54308-AT  | -0.644429961 | 5.80E-59 | negative   |
| FUBP1   | C2orf68-54309-AT  | 0.644426377  | 5.81E-59 | positive   |
| FUBP1   | MPV17-52966-AT    | -0.626462224 | 6.98E-55 | negative   |
| MAGOH   | RARA-40856-AP     | 0.633222617  | 2.19E-56 | positive   |
| DDX3X   | HAS3-37253-AT     | 0.620920564  | 1.12E-53 | positive   |
| DDX3X   | HAS3-37254-AT     | -0.620919556 | 1.12E-53 | negative   |
| DDX3X   | WDR20-29338-AT    | 0.624093098  | 2.30E-54 | positive   |
| SRSF11  | BOP1-85554-RI     | 0.604476086  | 3.07E-50 | positive   |
| SRSF11  | TPM1-30985-AT     | -0.601904245 | 1.02E-49 | negative   |
| SRSF11  | C5orf45-74948-RI  | 0.612018109  | 8.61E-52 | positive   |
| SRSF11  | DYNLT1-78273-AP   | 0.641393422  | 2.97E-58 | positive   |
| SRSF11  | DYNLT1-78274-AP   | -0.641393422 | 2.97E-58 | negative   |
| SRSF11  | PRICKLE3-89098-AT | 0.60160938   | 1.16E-49 | positive   |
| SRSF11  | PRICKLE3-89099-AT | -0.601628574 | 1.15E-49 | negative   |
| SRSF11  | DAPK2-31076-ES    | 0.670411815  | 2.26E-65 | positive   |
| SRSF11  | BCAT2-50816-ES    | 0.622157457  | 6.05E-54 | positive   |
| SRSF11  | NDUFB8-12824-AT   | -0.656993743 | 5.54E-62 | negative   |
| SRSF11  | EXOSC10-645-RI    | 0.721430403  | 4.56E-80 | positive   |
| DDX17   | MPV17-52966-AT    | -0.603782511 | 4.24E-50 | negative   |
| PPWD1   | NDUFB8-12824-AT   | -0.631192154 | 6.25E-56 | negative   |
| LUC7L   | STXBP2-47123-AP   | 0.640142083  | 5.78E-58 | positive   |

|        |                   |              |           |          |
|--------|-------------------|--------------|-----------|----------|
| LUC7L  | STXBP2-47122-AP   | -0.64014397  | 5.78E-58  | negative |
| LUC7L  | ZNF331-51722-AP   | 0.692274656  | 2.71E-71  | postive  |
| LUC7L  | VCL-12254-ES      | 0.609443393  | 2.95E-51  | postive  |
| LUC7L  | DYNLT1-78273-AP   | 0.694687079  | 5.58E-72  | postive  |
| LUC7L  | DYNLT1-78274-AP   | -0.694687079 | 5.58E-72  | negative |
| LUC7L  | DAPK2-31076-ES    | 0.613837018  | 3.59E-52  | postive  |
| LUC7L  | ANKRD10-26274-ES  | 0.612669798  | 6.30E-52  | postive  |
| LUC7L  | BCAT2-50816-ES    | 0.702585125  | 2.84E-74  | postive  |
| LUC7L  | EPOR-47693-ES     | 0.662583461  | 2.25E-63  | postive  |
| LUC7L  | PDHA1-88629-AP    | -0.639728771 | 7.20E-58  | negative |
| LUC7L  | EXOSC10-645-RI    | 0.739425341  | 4.59E-86  | postive  |
| LUC7L  | FAM213A-12362-AP  | -0.6658798   | 3.30E-64  | negative |
| SRRM2  | USP4-64850-AT     | -0.636716699 | 3.53E-57  | negative |
| SRRM2  | INO80C-45173-AT   | -0.68314116  | 9.33E-69  | negative |
| SRRM2  | INO80C-45172-AT   | 0.68314853   | 9.28E-69  | postive  |
| SRRM2  | TTLL5-28518-AT    | -0.675064281 | 1.37E-66  | negative |
| SRRM2  | USP4-64851-AT     | 0.735535962  | 1.00E-84  | postive  |
| SRRM2  | TRIM11-10208-AT   | -0.602551814 | 7.52E-50  | negative |
| SRRM2  | PTK2B-83155-AT    | -0.650775651 | 1.80E-60  | negative |
| SRRM2  | RHBDF1-32789-AT   | -0.602058565 | 9.45E-50  | negative |
| SRRM2  | C2orf68-54308-AT  | -0.744165867 | 9.97E-88  | negative |
| SRRM2  | C2orf68-54309-AT  | 0.744162893  | 1.00E-87  | postive  |
| SRRM2  | CCDC124-48386-AP  | 0.605553072  | 1.85E-50  | postive  |
| SRRM2  | CCDC124-48385-AP  | -0.605551738 | 1.85E-50  | negative |
| SRRM2  | HSP90AA1-29333-AT | -0.659973672 | 1.01E-62  | negative |
| SRRM2  | KCNC3-51173-AT    | -0.620366626 | 1.47E-53  | negative |
| SRRM2  | KCNC3-51172-AT    | 0.620364079  | 1.47E-53  | postive  |
| SRRM2  | PET100-47118-AT   | -0.627335207 | 4.48E-55  | negative |
| SRRM2  | NACA-22488-AD     | 0.6438389    | 7.98E-59  | postive  |
| SRRM2  | MPV17-52966-AT    | -0.817118519 | 4.61E-119 | negative |
| SRRM2  | SNRNP200-54521-ES | 0.630831028  | 7.52E-56  | postive  |
| SRRM2  | CNOT2-23366-AT    | 0.678609384  | 1.56E-67  | postive  |
| SRRM2  | NDUFB8-12824-AT   | -0.690263896 | 9.99E-71  | negative |
| LENG1  | CREBZF-18139-RI   | -0.62658748  | 6.55E-55  | negative |
| LENG1  | RARA-40856-AP     | 0.677223741  | 3.67E-67  | postive  |
| ZFR    | NUPL2-78961-AT    | -0.605802949 | 1.65E-50  | negative |
| ZFR    | NUPL2-78960-AT    | 0.605799014  | 1.65E-50  | postive  |
| ZFR    | KIAA2013-694-AT   | -0.605331726 | 2.06E-50  | negative |
| PRPF4B | PTCD2-72456-AT    | -0.640392988 | 5.06E-58  | negative |
| PRPF4B | PTCD2-72458-AT    | 0.640387326  | 5.07E-58  | postive  |
| PRPF4B | C2orf68-54308-AT  | -0.655378115 | 1.38E-61  | negative |
| PRPF4B | C2orf68-54309-AT  | 0.655378999  | 1.38E-61  | postive  |
| PRPF4B | KIAA2013-694-AT   | -0.675546491 | 1.02E-66  | negative |
| PRPF4B | MPV17-52966-AT    | -0.640643678 | 4.43E-58  | negative |
| PRPF4B | CNOT2-23366-AT    | 0.62149272   | 8.43E-54  | postive  |
| SF3B1  | C2orf68-54308-AT  | -0.652305353 | 7.72E-61  | negative |
| SF3B1  | C2orf68-54309-AT  | 0.652301455  | 7.73E-61  | postive  |
| RNF40  | CABIN1-61386-AP   | -0.610839053 | 1.52E-51  | negative |
| RNF40  | RARA-40856-AP     | -0.608697774 | 4.20E-51  | negative |
| RNF40  | KCNC3-51173-AT    | -0.620858343 | 1.15E-53  | negative |
| RNF40  | KCNC3-51172-AT    | 0.620863467  | 1.15E-53  | postive  |
| LUC7L3 | CCDC53-24023-ES   | 0.606679699  | 1.09E-50  | postive  |
| LUC7L3 | DYNLT1-78273-AP   | 0.648938589  | 4.97E-60  | postive  |
| LUC7L3 | DYNLT1-78274-AP   | -0.648938589 | 4.97E-60  | negative |
| LUC7L3 | DAPK2-31076-ES    | 0.621517939  | 8.32E-54  | postive  |
| LUC7L3 | BCAT2-50816-ES    | 0.61205      | 8.48E-52  | postive  |
| LUC7L3 | NDUFB8-12824-AT   | -0.610457077 | 1.82E-51  | negative |
| LUC7L3 | EXOSC10-645-RI    | 0.725284853  | 2.60E-81  | postive  |

|         |                   |              |          |          |
|---------|-------------------|--------------|----------|----------|
| PRPF31  | RARA-40856-AP     | 0.610027752  | 2.23E-51 | positive |
| PNN     | USP4-64851-AT     | 0.633332155  | 2.07E-56 | positive |
| PNN     | PTK2B-83155-AT    | -0.601492947 | 1.23E-49 | negative |
| PNN     | HSP90AA1-29333-AT | -0.611202282 | 1.27E-51 | negative |
| PNN     | MPV17-52966-AT    | -0.635729329 | 5.93E-57 | negative |
| PNN     | NDUFB8-12824-AT   | -0.667612264 | 1.19E-64 | negative |
| CWC15   | ZNF517-85650-AT   | -0.605434521 | 1.96E-50 | negative |
| CWC15   | RARA-40856-AP     | 0.692644246  | 2.13E-71 | positive |
| CDK10   | ZNF331-51722-AP   | 0.626109742  | 8.34E-55 | positive |
| SREK1   | USP4-64850-AT     | -0.66266774  | 2.15E-63 | negative |
| SREK1   | INO80C-45173-AT   | -0.629530763 | 1.47E-55 | negative |
| SREK1   | INO80C-45172-AT   | 0.629537891  | 1.46E-55 | positive |
| SREK1   | TTLL5-28518-AT    | -0.62364474  | 2.88E-54 | negative |
| SREK1   | USP4-64851-AT     | 0.735269019  | 1.23E-84 | positive |
| SREK1   | PTK2B-83155-AT    | -0.650971688 | 1.62E-60 | negative |
| SREK1   | CCDC124-48386-AP  | 0.628944629  | 1.98E-55 | positive |
| SREK1   | CCDC124-48385-AP  | -0.62895169  | 1.97E-55 | negative |
| SREK1   | HSP90AA1-29333-AT | -0.60536175  | 2.03E-50 | negative |
| SREK1   | MPV17-52966-AT    | -0.646700368 | 1.69E-59 | negative |
| SREK1   | SNRNP200-54521-ES | 0.604698055  | 2.77E-50 | positive |
| SREK1   | CNOT2-23366-AT    | 0.606212594  | 1.36E-50 | positive |
| SNRNP70 | BOP1-85554-RI     | 0.627088856  | 5.08E-55 | positive |
| SNRNP70 | CCDC53-24023-ES   | 0.616901888  | 8.09E-53 | positive |
| SNRNP70 | ZNF331-51722-AP   | 0.646653811  | 1.74E-59 | positive |
| SNRNP70 | DYNLT1-78273-AP   | 0.646958864  | 1.47E-59 | positive |
| SNRNP70 | DYNLT1-78274-AP   | -0.646958864 | 1.47E-59 | negative |
| SNRNP70 | EXOSC10-645-RI    | 0.640489276  | 4.81E-58 | positive |
| DDX46   | CABIN1-61386-AP   | -0.606117064 | 1.42E-50 | negative |
| DDX46   | IFIH1-55768-AT    | -0.60545203  | 1.94E-50 | negative |
| DDX46   | IFIH1-55767-AT    | 0.605434907  | 1.96E-50 | positive |
| DDX46   | PTCD2-72456-AT    | -0.704552043 | 7.41E-75 | negative |
| DDX46   | PTCD2-72458-AT    | 0.704546917  | 7.43E-75 | positive |
| DDX46   | NUPL2-78961-AT    | -0.637754205 | 2.05E-57 | negative |
| DDX46   | NUPL2-78960-AT    | 0.637752342  | 2.05E-57 | positive |
| DDX46   | HAS3-37253-AT     | 0.638887303  | 1.13E-57 | positive |
| DDX46   | HAS3-37254-AT     | -0.638888549 | 1.12E-57 | negative |
| DDX46   | KIAA2013-694-AT   | -0.723657787 | 8.77E-81 | negative |
| DDX46   | KCNC3-51173-AT    | -0.617137802 | 7.21E-53 | negative |
| DDX46   | KCNC3-51172-AT    | 0.617145117  | 7.18E-53 | positive |
| DDX46   | F11R-8516-AP      | -0.604613918 | 2.88E-50 | negative |
| DDX46   | F11R-8517-AP      | 0.60461248   | 2.88E-50 | positive |
| DDX46   | ANKS1B-23885-AT   | 0.604720613  | 2.74E-50 | positive |
| DDX46   | ANKS1B-23886-AT   | -0.604716371 | 2.74E-50 | negative |
| DDX46   | SZT2-2175-AT      | 0.603606368  | 4.60E-50 | positive |
| RAVER1  | TM9SF1-26891-AP   | -0.632642278 | 2.96E-56 | negative |
| RAVER1  | TM9SF1-26892-AP   | 0.63264155   | 2.96E-56 | positive |
| PAXBP1  | TPM1-30985-AT     | -0.60333141  | 5.23E-50 | negative |
| PAXBP1  | DYNLT1-78273-AP   | 0.672239393  | 7.56E-66 | positive |
| PAXBP1  | DYNLT1-78274-AP   | -0.672239393 | 7.56E-66 | negative |
| PAXBP1  | DAPK2-31076-ES    | 0.632949835  | 2.52E-56 | positive |
| PAXBP1  | BCAT2-50816-ES    | 0.649659751  | 3.34E-60 | positive |
| PAXBP1  | EXOSC10-645-RI    | 0.724433869  | 4.92E-81 | positive |
| CCDC12  | CABIN1-61386-AP   | 0.646408112  | 1.98E-59 | positive |
| CCDC12  | PTCD2-72456-AT    | 0.601141853  | 1.44E-49 | positive |
| CCDC12  | PTCD2-72458-AT    | -0.60114582  | 1.44E-49 | negative |
| CCDC12  | CREBZF-18139-RI   | -0.631199306 | 6.22E-56 | negative |
| CCDC12  | NUPL2-78961-AT    | 0.611689803  | 1.01E-51 | positive |
| CCDC12  | NUPL2-78960-AT    | -0.611698706 | 1.00E-51 | negative |

|         |                   |              |          |          |
|---------|-------------------|--------------|----------|----------|
| CCDC12  | HAS3-37253-AT     | -0.672052201 | 8.46E-66 | negative |
| CCDC12  | HAS3-37254-AT     | 0.672051068  | 8.47E-66 | postive  |
| CCDC12  | DENND1B-9304-AT   | 0.622841947  | 4.30E-54 | postive  |
| CCDC12  | DENND1B-9305-AT   | -0.622840332 | 4.31E-54 | negative |
| CCDC12  | RARA-40856-AP     | 0.766296014  | 5.22E-96 | postive  |
| CCDC12  | TGFBR3-3739-AP    | -0.603027238 | 6.03E-50 | negative |
| RBM25   | USP4-64850-AT     | -0.636142377 | 4.78E-57 | negative |
| RBM25   | INO80C-45173-AT   | -0.615848001 | 1.35E-52 | negative |
| RBM25   | INO80C-45172-AT   | 0.615846042  | 1.35E-52 | postive  |
| RBM25   | TTLL5-28518-AT    | -0.633175136 | 2.24E-56 | negative |
| RBM25   | USP4-64851-AT     | 0.683749785  | 6.36E-69 | postive  |
| RBM25   | PTK2B-83155-AT    | -0.619276242 | 2.52E-53 | negative |
| RBM25   | TPM1-30985-AT     | -0.607827884 | 6.34E-51 | negative |
| RBM25   | CCDC124-48386-AP  | 0.608977065  | 3.68E-51 | postive  |
| RBM25   | CCDC124-48385-AP  | -0.608983678 | 3.67E-51 | negative |
| RBM25   | HSP90AA1-29333-AT | -0.634126765 | 1.37E-56 | negative |
| RBM25   | C5orf45-74948-RI  | 0.691431638  | 4.69E-71 | postive  |
| RBM25   | PTRH2-42790-AP    | -0.617105209 | 7.32E-53 | negative |
| RBM25   | PTRH2-42789-AP    | 0.617103059  | 7.33E-53 | postive  |
| RBM25   | PRICKLE3-89098-AT | 0.638955137  | 1.09E-57 | postive  |
| RBM25   | PRICKLE3-89099-AT | -0.638966528 | 1.08E-57 | negative |
| RBM25   | DAPK2-31076-ES    | 0.693473332  | 1.24E-71 | postive  |
| RBM25   | NACA-22488-AD     | 0.625816586  | 9.67E-55 | postive  |
| RBM25   | MPV17-52966-AT    | -0.686321134 | 1.25E-69 | negative |
| RBM25   | SNRNP200-54521-ES | 0.610620759  | 1.68E-51 | postive  |
| RBM25   | NDUFB8-12824-AT   | -0.705345464 | 4.29E-75 | negative |
| RBM25   | EXOSC10-645-RI    | 0.648457602  | 6.47E-60 | postive  |
| CLK4    | DYNLT1-78273-AP   | 0.654724443  | 1.99E-61 | postive  |
| CLK4    | DYNLT1-78274-AP   | -0.654724443 | 1.99E-61 | negative |
| CLK4    | BCAT2-50816-ES    | 0.617771176  | 5.29E-53 | postive  |
| CLK4    | EXOSC10-645-RI    | 0.711499114  | 5.90E-77 | postive  |
| SNRNP25 | IL1RAP-68106-AT   | 0.626129355  | 8.26E-55 | postive  |
| EIF3A   | CABIN1-61386-AP   | -0.622887986 | 4.21E-54 | negative |
| EIF3A   | PTCD2-72456-AT    | -0.676531152 | 5.60E-67 | negative |
| EIF3A   | PTCD2-72458-AT    | 0.676531631  | 5.60E-67 | postive  |
| EIF3A   | ARHGEF26-67329-AP | -0.635740439 | 5.90E-57 | negative |
| EIF3A   | FADS1-16298-AP    | -0.614497788 | 2.61E-52 | negative |
| EIF3A   | NUPL2-78961-AT    | -0.637598745 | 2.22E-57 | negative |
| EIF3A   | NUPL2-78960-AT    | 0.637595676  | 2.23E-57 | postive  |
| EIF3A   | HAS3-37253-AT     | 0.609002919  | 3.64E-51 | postive  |
| EIF3A   | HAS3-37254-AT     | -0.609005052 | 3.63E-51 | negative |
| EIF3A   | ARHGEF26-67328-AP | 0.631748177  | 4.69E-56 | postive  |
| EIF3A   | DENND1B-9304-AT   | -0.633227261 | 2.18E-56 | negative |
| EIF3A   | DENND1B-9305-AT   | 0.633224828  | 2.19E-56 | postive  |
| EIF3A   | RARA-40856-AP     | -0.695526377 | 3.21E-72 | negative |
| EIF3A   | TGFBR3-3739-AP    | 0.632351117  | 3.44E-56 | postive  |
| EIF3A   | SZT2-2175-AT      | 0.610235897  | 2.02E-51 | postive  |
| SNRPD2  | CABIN1-61386-AP   | 0.605318499  | 2.07E-50 | postive  |
| SNRPD2  | HAS3-37253-AT     | -0.642574314 | 1.58E-58 | negative |
| SNRPD2  | HAS3-37254-AT     | 0.642573499  | 1.58E-58 | postive  |
| SNRPD2  | RARA-40856-AP     | 0.709628499  | 2.20E-76 | postive  |
| SNRPD2  | TENC1-21923-AP    | 0.6016974    | 1.12E-49 | postive  |
| PRPF39  | BOP1-85554-RI     | 0.639618128  | 7.64E-58 | postive  |
| PRPF39  | DYNLT1-78273-AP   | 0.629826028  | 1.26E-55 | postive  |
| PRPF39  | DYNLT1-78274-AP   | -0.629826028 | 1.26E-55 | negative |
| PRPF39  | DAPK2-31076-ES    | 0.670698045  | 1.90E-65 | postive  |
| PRPF39  | EXOSC10-645-RI    | 0.717611835  | 7.44E-79 | postive  |
| NELFE   | RARA-40856-AP     | 0.612813295  | 5.88E-52 | postive  |

|         |                   |              |           |          |
|---------|-------------------|--------------|-----------|----------|
| DDX39B  | USP4-64850-AT     | -0.619604386 | 2.15E-53  | negative |
| DDX39B  | BOP1-85554-RI     | 0.62351354   | 3.08E-54  | postive  |
| DDX39B  | IDH3G-90494-RI    | 0.627419757  | 4.30E-55  | postive  |
| DDX39B  | RHBDF1-32789-AT   | -0.667265237 | 1.46E-64  | negative |
| DDX39B  | CLDND1-65747-AP   | 0.618405792  | 3.87E-53  | postive  |
| DDX39B  | CCDC53-24023-ES   | 0.623879739  | 2.56E-54  | postive  |
| DDX39B  | HSP90AA1-29333-AT | -0.628029094 | 3.15E-55  | negative |
| DDX39B  | VCL-12254-ES      | 0.612858416  | 5.75E-52  | postive  |
| DDX39B  | C5orf45-74948-RI  | 0.775198858  | 1.33E-99  | postive  |
| DDX39B  | PTRH2-42790-AP    | -0.635882193 | 5.48E-57  | negative |
| DDX39B  | PTRH2-42789-AP    | 0.635872898  | 5.50E-57  | postive  |
| DDX39B  | DYNLT1-78273-AP   | 0.70079866   | 9.51E-74  | postive  |
| DDX39B  | DYNLT1-78274-AP   | -0.70079866  | 9.51E-74  | negative |
| DDX39B  | PRICKLE3-89098-AT | 0.664652971  | 6.77E-64  | postive  |
| DDX39B  | PRICKLE3-89099-AT | -0.664658988 | 6.74E-64  | negative |
| DDX39B  | DAPK2-31076-ES    | 0.765753475  | 8.55E-96  | postive  |
| DDX39B  | PET100-47118-AT   | -0.642284486 | 1.84E-58  | negative |
| DDX39B  | NACA-22488-AD     | 0.605124759  | 2.26E-50  | postive  |
| DDX39B  | BCAT2-50816-ES    | 0.605393365  | 2.00E-50  | postive  |
| DDX39B  | MPV17-52966-AT    | -0.681545709 | 2.53E-68  | negative |
| DDX39B  | NDUFB8-12824-AT   | -0.803398842 | 3.53E-112 | negative |
| DDX39B  | EXOSC10-645-RI    | 0.757772442  | 1.03E-92  | postive  |
| UBL5    | CABIN1-61386-AP   | 0.605178853  | 2.21E-50  | postive  |
| UBL5    | PTCD2-72456-AT    | 0.664610169  | 6.94E-64  | postive  |
| UBL5    | PTCD2-72458-AT    | -0.664611983 | 6.93E-64  | negative |
| UBL5    | ARHGEF26-67329-AP | 0.637988927  | 1.81E-57  | postive  |
| UBL5    | NUPL2-78961-AT    | 0.64401474   | 7.26E-59  | postive  |
| UBL5    | NUPL2-78960-AT    | -0.644015383 | 7.26E-59  | negative |
| UBL5    | ARHGEF26-67328-AP | -0.635657992 | 6.16E-57  | negative |
| UBL5    | DENND1B-9304-AT   | 0.66262838   | 2.20E-63  | postive  |
| UBL5    | DENND1B-9305-AT   | -0.662625108 | 2.20E-63  | negative |
| UBL5    | ZNF517-85650-AT   | -0.607638507 | 6.94E-51  | negative |
| UBL5    | RARA-40856-AP     | 0.787972151  | 4.63E-105 | postive  |
| RBM39   | DYNLT1-78273-AP   | 0.607714151  | 6.70E-51  | postive  |
| RBM39   | DYNLT1-78274-AP   | -0.607714151 | 6.70E-51  | negative |
| RBM39   | NDUFB8-12824-AT   | -0.624469854 | 1.90E-54  | negative |
| RBM39   | EXOSC10-645-RI    | 0.684393244  | 4.24E-69  | postive  |
| CCDC130 | ZNF331-51722-AP   | 0.664014483  | 9.82E-64  | postive  |
| CCDC130 | DYNLT1-78273-AP   | 0.619430335  | 2.34E-53  | postive  |
| CCDC130 | DYNLT1-78274-AP   | -0.619430335 | 2.34E-53  | negative |
| CCDC130 | EXOSC10-645-RI    | 0.603951623  | 3.92E-50  | postive  |
| LSM4    | PTCD2-72456-AT    | 0.629175326  | 1.76E-55  | postive  |
| LSM4    | PTCD2-72458-AT    | -0.629174209 | 1.76E-55  | negative |
| LSM4    | DENND1B-9304-AT   | 0.647217889  | 1.28E-59  | postive  |
| LSM4    | DENND1B-9305-AT   | -0.647217541 | 1.28E-59  | negative |
| LSM4    | RARA-40856-AP     | 0.651170277  | 1.45E-60  | postive  |
| SDE2    | PTCD2-72456-AT    | -0.608898687 | 3.82E-51  | negative |
| SDE2    | PTCD2-72458-AT    | 0.60889427   | 3.83E-51  | postive  |
| SDE2    | NUPL2-78961-AT    | -0.619556076 | 2.20E-53  | negative |
| SDE2    | NUPL2-78960-AT    | 0.619563836  | 2.19E-53  | postive  |
| SDE2    | HAS3-37253-AT     | 0.642483931  | 1.65E-58  | postive  |
| SDE2    | HAS3-37254-AT     | -0.642485107 | 1.65E-58  | negative |
| DDX21   | PTCD2-72456-AT    | -0.619313009 | 2.48E-53  | negative |
| DDX21   | PTCD2-72458-AT    | 0.619311608  | 2.48E-53  | postive  |
| PQBP1   | CABIN1-61386-AP   | 0.627986919  | 3.22E-55  | postive  |
| PQBP1   | HAS3-37253-AT     | -0.604573644 | 2.93E-50  | negative |
| PQBP1   | HAS3-37254-AT     | 0.604577051  | 2.93E-50  | postive  |
| PQBP1   | RARA-40856-AP     | 0.7195159    | 1.86E-79  | postive  |

|         |                  |              |          |          |
|---------|------------------|--------------|----------|----------|
| PQBP1   | EMP1-20539-ES    | -0.637116313 | 2.87E-57 | negative |
| CLK2    | DYNLT1-78273-AP  | 0.643161503  | 1.15E-58 | postive  |
| CLK2    | DYNLT1-78274-AP  | -0.643161503 | 1.15E-58 | negative |
| CLK2    | NDUFB8-12824-AT  | -0.618757555 | 3.26E-53 | negative |
| CLK2    | EXOSC10-645-RI   | 0.676160654  | 7.03E-67 | postive  |
| DHX34   | DYNLT1-78273-AP  | 0.602437272  | 7.93E-50 | postive  |
| DHX34   | DYNLT1-78274-AP  | -0.602437272 | 7.93E-50 | negative |
| RBBP6   | USP4-64851-AT    | 0.638513318  | 1.37E-57 | postive  |
| RBBP6   | MPV17-52966-AT   | -0.641238498 | 3.22E-58 | negative |
| DHX36   | PTCD2-72456-AT   | -0.626161445 | 8.12E-55 | negative |
| DHX36   | PTCD2-72458-AT   | 0.626157325  | 8.14E-55 | postive  |
| DHX36   | NUPL2-78961-AT   | -0.639220212 | 9.43E-58 | negative |
| DHX36   | NUPL2-78960-AT   | 0.639219873  | 9.44E-58 | postive  |
| DHX36   | HAS3-37253-AT    | 0.614034202  | 3.26E-52 | postive  |
| DHX36   | HAS3-37254-AT    | -0.614036279 | 3.26E-52 | negative |
| SNRPG   | RARA-40856-AP    | 0.658965362  | 1.81E-62 | postive  |
| ISY1    | CABIN1-61386-AP  | 0.63808323   | 1.72E-57 | postive  |
| ISY1    | RARA-40857-AP    | -0.646055606 | 2.40E-59 | negative |
| ISY1    | CREBZF-18139-RI  | -0.608747952 | 4.10E-51 | negative |
| ISY1    | HAS3-37253-AT    | -0.614606421 | 2.47E-52 | negative |
| ISY1    | HAS3-37254-AT    | 0.614607794  | 2.47E-52 | postive  |
| ISY1    | RARA-40856-AP    | 0.725754208  | 1.83E-81 | postive  |
| ISY1    | TGFBR3-3739-AP   | -0.616553304 | 9.59E-53 | negative |
| CPSF6   | MPV17-52966-AT   | -0.624413154 | 1.96E-54 | negative |
| PRPF38B | NDUFB8-12824-AT  | -0.610482668 | 1.80E-51 | negative |
| DHX9    | KIAA2013-694-AT  | -0.611794229 | 9.59E-52 | negative |
| SRRM1   | USP4-64851-AT    | 0.605511269  | 1.89E-50 | postive  |
| SRRM1   | C2orf68-54308-AT | -0.656374047 | 7.87E-62 | negative |
| SRRM1   | C2orf68-54309-AT | 0.656366651  | 7.90E-62 | postive  |
| SRRM1   | MPV17-52966-AT   | -0.6995745   | 2.17E-73 | negative |
| SRRM1   | NDUFB8-12824-AT  | -0.633725695 | 1.69E-56 | negative |
| RBM42   | RARA-40856-AP    | 0.612788001  | 5.95E-52 | postive  |
| LSM7    | CABIN1-61386-AP  | 0.670246149  | 2.49E-65 | postive  |
| LSM7    | CREBZF-18139-RI  | -0.601378154 | 1.30E-49 | negative |
| LSM7    | HAS3-37253-AT    | -0.635805642 | 5.70E-57 | negative |
| LSM7    | HAS3-37254-AT    | 0.635806707  | 5.70E-57 | postive  |
| LSM7    | RARA-40856-AP    | 0.742258632  | 4.70E-87 | postive  |
| TCERG1  | C5orf45-74948-RI | 0.691107643  | 5.78E-71 | postive  |
| TCERG1  | PTRH2-42790-AP   | -0.622613053 | 4.82E-54 | negative |
| TCERG1  | PTRH2-42789-AP   | 0.622614786  | 4.82E-54 | postive  |
| TCERG1  | DYNLT1-78273-AP  | 0.638547918  | 1.35E-57 | postive  |
| TCERG1  | DYNLT1-78274-AP  | -0.638547918 | 1.35E-57 | negative |
| TCERG1  | DAPK2-31076-ES   | 0.703954219  | 1.12E-74 | postive  |
| TCERG1  | BCAT2-50816-ES   | 0.621283188  | 9.35E-54 | postive  |
| TCERG1  | NDUFB8-12824-AT  | -0.675219189 | 1.25E-66 | negative |
| TCERG1  | EXOSC10-645-RI   | 0.713831021  | 1.13E-77 | postive  |
| HNRNPH1 | USP4-64850-AT    | -0.62515865  | 1.35E-54 | negative |
| HNRNPH1 | IDH3G-90494-RI   | 0.609454156  | 2.93E-51 | postive  |
| HNRNPH1 | TTLL5-28518-AT   | -0.644115495 | 6.88E-59 | negative |
| HNRNPH1 | USP4-64851-AT    | 0.664587387  | 7.03E-64 | postive  |
| HNRNPH1 | C5orf45-74948-RI | 0.665417428  | 4.33E-64 | postive  |
| HNRNPH1 | DYNLT1-78273-AP  | 0.617077939  | 7.42E-53 | postive  |
| HNRNPH1 | DYNLT1-78274-AP  | -0.617077939 | 7.42E-53 | negative |
| HNRNPH1 | PET100-47118-AT  | -0.621800142 | 7.23E-54 | negative |
| HNRNPH1 | MPV17-52966-AT   | -0.727600458 | 4.54E-82 | negative |
| HNRNPH1 | NDUFB8-12824-AT  | -0.733151346 | 6.43E-84 | negative |
| SNRPA   | HAS3-37253-AT    | -0.619304006 | 2.49E-53 | negative |
| SNRPA   | HAS3-37254-AT    | 0.619308051  | 2.48E-53 | postive  |

|          |                   |              |          |          |
|----------|-------------------|--------------|----------|----------|
| SNRPA    | RARA-40856-AP     | 0.638524346  | 1.36E-57 | postive  |
| SNRPA    | ANKRD10-26274-ES  | 0.604366353  | 3.23E-50 | postive  |
| ARGLU1   | BOP1-85554-RI     | 0.609904007  | 2.37E-51 | postive  |
| ARGLU1   | ZNF331-51722-AP   | 0.609821408  | 2.46E-51 | postive  |
| ARGLU1   | DYNLT1-78273-AP   | 0.638681857  | 1.25E-57 | postive  |
| ARGLU1   | DYNLT1-78274-AP   | -0.638681857 | 1.25E-57 | negative |
| ARGLU1   | DAPK2-31076-ES    | 0.626031849  | 8.67E-55 | postive  |
| ARGLU1   | BCAT2-50816-ES    | 0.601769577  | 1.08E-49 | postive  |
| ARGLU1   | EPOR-47693-ES     | 0.604319368  | 3.30E-50 | postive  |
| ARGLU1   | NDUFB8-12824-AT   | -0.614628078 | 2.45E-52 | negative |
| ARGLU1   | EXOSC10-645-RI    | 0.707245239  | 1.16E-75 | postive  |
| SART1    | CABIN1-61386-AP   | 0.613436674  | 4.35E-52 | postive  |
| SART1    | HAS3-37253-AT     | -0.601433653 | 1.26E-49 | negative |
| SART1    | HAS3-37254-AT     | 0.601437262  | 1.26E-49 | postive  |
| TRA2A    | EXOSC10-645-RI    | 0.625639503  | 1.06E-54 | postive  |
| YBX3     | SHROOM4-89139-AP  | -0.651228068 | 1.40E-60 | negative |
| YBX3     | SHROOM4-89138-AP  | 0.662359362  | 2.57E-63 | postive  |
| YBX3     | CACNB3-21469-AP   | -0.629110277 | 1.82E-55 | negative |
| YBX3     | TMEM79-8218-AP    | -0.602238489 | 8.70E-50 | negative |
| YBX3     | TMEM79-8217-AP    | 0.608857544  | 3.90E-51 | postive  |
| SNRNP200 | PTCD2-72456-AT    | -0.625927478 | 9.14E-55 | negative |
| SNRNP200 | PTCD2-72458-AT    | 0.625923815  | 9.16E-55 | postive  |
| SNRNP200 | WDR20-29338-AT    | 0.602616     | 7.30E-50 | postive  |
| SNRNP200 | KIAA2013-694-AT   | -0.608313799 | 5.04E-51 | negative |
| THOC1    | ZNF331-51722-AP   | 0.643164068  | 1.15E-58 | postive  |
| THOC1    | DYNLT1-78273-AP   | 0.640582845  | 4.57E-58 | postive  |
| THOC1    | DYNLT1-78274-AP   | -0.640582845 | 4.57E-58 | negative |
| THOC1    | DAPK2-31076-ES    | 0.637066095  | 2.94E-57 | postive  |
| THOC1    | BCAT2-50816-ES    | 0.638054565  | 1.75E-57 | postive  |
| THOC1    | EXOSC10-645-RI    | 0.733197781  | 6.21E-84 | postive  |
| RBM5     | BOP1-85554-RI     | 0.604615308  | 2.87E-50 | postive  |
| RBM5     | CCDC53-24023-ES   | 0.660686787  | 6.73E-63 | postive  |
| RBM5     | C5orf45-74948-RI  | 0.603578915  | 4.66E-50 | postive  |
| RBM5     | DYNLT1-78273-AP   | 0.724304889  | 5.41E-81 | postive  |
| RBM5     | DYNLT1-78274-AP   | -0.724304889 | 5.41E-81 | negative |
| RBM5     | DAPK2-31076-ES    | 0.64640614   | 1.99E-59 | postive  |
| RBM5     | BCAT2-50816-ES    | 0.651220627  | 1.41E-60 | postive  |
| RBM5     | NDUFB8-12824-AT   | -0.688920129 | 2.37E-70 | negative |
| RBM5     | EXOSC10-645-RI    | 0.737819106  | 1.65E-85 | postive  |
| PRPF3    | DYNLT1-78273-AP   | 0.631023838  | 6.81E-56 | postive  |
| PRPF3    | DYNLT1-78274-AP   | -0.631023838 | 6.81E-56 | negative |
| PRPF3    | NDUFB8-12824-AT   | -0.634619723 | 1.06E-56 | negative |
| PRPF3    | EXOSC10-645-RI    | 0.636130908  | 4.81E-57 | postive  |
| SAP30BP  | RARA-40856-AP     | 0.605252127  | 2.13E-50 | postive  |
| SPEN     | PTCD2-72456-AT    | -0.638006784 | 1.79E-57 | negative |
| SPEN     | PTCD2-72458-AT    | 0.638004095  | 1.79E-57 | postive  |
| SPEN     | NUPL2-78961-AT    | -0.607215097 | 8.48E-51 | negative |
| SPEN     | NUPL2-78960-AT    | 0.607213295  | 8.48E-51 | postive  |
| CELF2    | PTS-18764-ES      | -0.610401381 | 1.87E-51 | negative |
| SRSF6    | EXOSC10-645-RI    | 0.601370931  | 1.30E-49 | postive  |
| DHX15    | PTCD2-72456-AT    | -0.646299007 | 2.11E-59 | negative |
| DHX15    | PTCD2-72458-AT    | 0.646294993  | 2.11E-59 | postive  |
| DHX15    | KIAA2013-694-AT   | -0.629464931 | 1.52E-55 | negative |
| TTC14    | BOP1-85554-RI     | 0.626906584  | 5.57E-55 | postive  |
| TTC14    | TPM1-30985-AT     | -0.64425037  | 6.39E-59 | negative |
| TTC14    | CCDC53-24023-ES   | 0.60452701   | 3.00E-50 | postive  |
| TTC14    | HSP90AA1-29333-AT | -0.628405169 | 2.60E-55 | negative |
| TTC14    | DYNLT1-78273-AP   | 0.670310753  | 2.40E-65 | postive  |

|         |                   |              |          |          |
|---------|-------------------|--------------|----------|----------|
| TTC14   | DYNLT1-78274-AP   | -0.670310753 | 2.40E-65 | negative |
| TTC14   | DAPK2-31076-ES    | 0.64631633   | 2.09E-59 | postive  |
| TTC14   | NDUFB8-12824-AT   | -0.651768959 | 1.04E-60 | negative |
| TTC14   | EXOSC10-645-RI    | 0.713098339  | 1.90E-77 | postive  |
| CDC40   | CABIN1-61386-AP   | -0.609224938 | 3.27E-51 | negative |
| CDC40   | PTCD2-72456-AT    | -0.627381577 | 4.38E-55 | negative |
| CDC40   | PTCD2-72458-AT    | 0.627379024  | 4.39E-55 | postive  |
| CDC40   | NUPL2-78961-AT    | -0.633170988 | 2.25E-56 | negative |
| CDC40   | NUPL2-78960-AT    | 0.633171393  | 2.25E-56 | postive  |
| CDC40   | KIAA2013-694-AT   | -0.630293267 | 9.91E-56 | negative |
| CDC40   | RARA-40856-AP     | -0.600866903 | 1.64E-49 | negative |
| CDC40   | ANKS1B-23885-AT   | 0.634595765  | 1.07E-56 | postive  |
| CDC40   | ANKS1B-23886-AT   | -0.634591    | 1.07E-56 | negative |
| CLASRP  | ZNF331-51722-AP   | 0.652300039  | 7.74E-61 | postive  |
| CLASRP  | DYNLT1-78273-AP   | 0.657422688  | 4.34E-62 | postive  |
| CLASRP  | DYNLT1-78274-AP   | -0.657422688 | 4.34E-62 | negative |
| CLASRP  | BCAT2-50816-ES    | 0.627191767  | 4.82E-55 | postive  |
| CLASRP  | EPOR-47693-ES     | 0.606738912  | 1.06E-50 | postive  |
| CLASRP  | EXOSC10-645-RI    | 0.658999877  | 1.77E-62 | postive  |
| RALY    | CABIN1-61386-AP   | 0.6074004    | 7.77E-51 | postive  |
| RALY    | RARA-40856-AP     | 0.62747801   | 4.17E-55 | postive  |
| RNPC3   | BOP1-85554-RI     | 0.618284115  | 4.11E-53 | postive  |
| RNPC3   | PTK2B-83155-AT    | -0.60832364  | 5.02E-51 | negative |
| RNPC3   | HSP90AA1-29333-AT | -0.621846576 | 7.07E-54 | negative |
| RNPC3   | DAPK2-31076-ES    | 0.619032303  | 2.84E-53 | postive  |
| RNPC3   | MPV17-52966-AT    | -0.639685227 | 7.37E-58 | negative |
| RNPC3   | NDUFB8-12824-AT   | -0.660125856 | 9.29E-63 | negative |
| RNPC3   | EXOSC10-645-RI    | 0.643861025  | 7.89E-59 | postive  |
| INTS3   | FNTA-83754-AD     | 0.603183221  | 5.61E-50 | postive  |
| INTS3   | USP4-64850-AT     | -0.698577458 | 4.23E-73 | negative |
| INTS3   | INO80C-45173-AT   | -0.636052259 | 5.01E-57 | negative |
| INTS3   | INO80C-45172-AT   | 0.636055186  | 5.00E-57 | postive  |
| INTS3   | TTLL5-28518-AT    | -0.667857167 | 1.03E-64 | negative |
| INTS3   | USP4-64851-AT     | 0.719125572  | 2.47E-79 | postive  |
| INTS3   | PTK2B-83155-AT    | -0.671889019 | 9.33E-66 | negative |
| INTS3   | ITFG2-19715-AT    | -0.623858199 | 2.59E-54 | negative |
| INTS3   | C5orf45-74948-RI  | 0.62890859   | 2.01E-55 | postive  |
| INTS3   | DAPK2-31076-ES    | 0.625394566  | 1.20E-54 | postive  |
| INTS3   | MPV17-52966-AT    | -0.672652081 | 5.90E-66 | negative |
| INTS3   | NDUFB8-12824-AT   | -0.643182094 | 1.14E-58 | negative |
| SRSF5   | DYNLT1-78273-AP   | 0.615645912  | 1.49E-52 | postive  |
| SRSF5   | DYNLT1-78274-AP   | -0.615645912 | 1.49E-52 | negative |
| SRSF5   | EPOR-47693-ES     | 0.629381692  | 1.58E-55 | postive  |
| SRSF5   | NDUFB8-12824-AT   | -0.622117692 | 6.17E-54 | negative |
| SRSF5   | EXOSC10-645-RI    | 0.645443983  | 3.35E-59 | postive  |
| SNRNP35 | RARA-40856-AP     | 0.713845557  | 1.12E-77 | postive  |
| SNRNP35 | EMP1-20539-ES     | -0.614154116 | 3.08E-52 | negative |
| GPATCH8 | PTCD2-72456-AT    | -0.665896793 | 3.27E-64 | negative |
| GPATCH8 | PTCD2-72458-AT    | 0.6658927    | 3.28E-64 | postive  |
| GPATCH8 | NUPL2-78961-AT    | -0.63760763  | 2.21E-57 | negative |
| GPATCH8 | NUPL2-78960-AT    | 0.637605496  | 2.21E-57 | postive  |
| GPATCH8 | C2orf68-54308-AT  | -0.694888584 | 4.89E-72 | negative |
| GPATCH8 | C2orf68-54309-AT  | 0.694894841  | 4.87E-72 | postive  |
| GPATCH8 | KIAA2013-694-AT   | -0.682632473 | 1.28E-68 | negative |
| GPATCH8 | KCNC3-51173-AT    | -0.64382351  | 8.05E-59 | negative |
| GPATCH8 | KCNC3-51172-AT    | 0.643829991  | 8.02E-59 | postive  |
| GPATCH8 | MYEF2-30481-AT    | -0.615074061 | 1.97E-52 | negative |
| GPATCH8 | MPV17-52966-AT    | -0.664536001 | 7.25E-64 | negative |



|         |                 |              |          |          |
|---------|-----------------|--------------|----------|----------|
| GPATCH8 | CNOT2-23366-AT  | 0.639270832  | 9.18E-58 | postive  |
| ZC3H13  | PTCD2-72456-AT  | -0.645434962 | 3.37E-59 | negative |
| ZC3H13  | PTCD2-72458-AT  | 0.645430292  | 3.38E-59 | postive  |
| ZC3H13  | NUPL2-78961-AT  | -0.606471436 | 1.20E-50 | negative |
| ZC3H13  | NUPL2-78960-AT  | 0.606469367  | 1.20E-50 | postive  |
| ZC3H13  | KIAA2013-694-AT | -0.614513813 | 2.58E-52 | negative |
